# Supplementary material for: Determinants of nucleosome positioning and their influence on plant gene expression
Source: PubMed Central journal article supplement — Genome Res. 2015 Aug;25(8):1182–95. doi: 10.1101/gr.188680.114 (PMC4510002; doi:10.1101/gr.188680.114), 2015-08
Supplement: supp_gr.188680.114_Supplemental_Material.pdf [file supp_gr.188680.114_Supplemental_Material.pdf]

## SUPPLEMENTAL MATERIAL

### *Supplemental Figure S1. Nucleosome profiling in *A. thaliana**

(A) Electrophoresis on 2% agarose of the MNase-digested nucleosome genomic DNA (gDNA) sample. Mono- and di-nucleosomes are marked by \* (~150 nt) and \*\* (~330 nt), respectively. Rep: biological replicate. COR+: 5  $\mu$  M coronatine treatment for 1 hr. COR-: water treatment for 1 hr. (B) Electrophoresis of MNase-digested naked gDNA sample for 1.75 min (middle lane) and 3 min (right lane). The gel image is chopped since there are samples between ladder and naked gDNA. (C) Nucleosome occupancy around the transcription start site (TSS) and transcription termination site (TTS) for nucleosome gDNA (black line) and naked gDNA (gray line), respectively. The x-axis indicates the position relative to TSS or TTS. The y-axis shows the median nucleosome occupancy score (NOC) of all protein coding genes per base (see **Methods**). NDR: nucleosome-depleted region. +1: the first major nucleosome position after TSS. (D) Same as (C) except that NOCs were calculated by considering only the midpoints of regions covered by paired-end reads (see **Methods**).

### *Supplemental Figure S2. Nucleosome occupancy of example motif sites and background*

(A) Nucleosome occupancy profiles around motif sites and background locations. Upper panel: the NOC (per base) profiles on G-box (CACGTG) and the shuffled motif (CTGCAG, with the same G/C content). Lower panel: the background NOC profiles of sites at the same positions relative to TSS as the G-box and the shuffled motifs but from randomly chosen genes (see **Methods**). Proximal: 500 bp upstream to TSS. Distal: 1.0 kb to 500 bp upstream of TSS. Blue lines indicate the median and gray areas indicate the 25<sup>th</sup> and 75<sup>th</sup> percentile NOC scores. (B) An illustration of how the normalized NOC scores on 6-mer motifs is determined.

### *Supplemental Figure S3. The anti-correlation between normalized NOC and DHSs for 6-mer motifs.*

(A) The normalized NOC and DHS profiles for GGGCCG and TCTATA motifs. The x-axis represents the distance to motif sites located in proximal (proximal, 500 bp upstream to TSS) or distal promoters (1.0 kb to 500 bp upstream of TSS). NOC: nucleosome occupancy score. DHS: DNase I hypersensitivity score. (B) The relationship between median normalized NOC scores of all sites (y-axes) and NOC scores of sites passing different DHS thresholds (0.03, 0.02, and, 0.01, respectively, from left to right, x-axes) (n=4,096).

***Supplemental Figure S4. Nucleosome occupancy profiles of 6-mer sites located in 5'UTR***

The *A. thaliana* nucleosome occupancy around 6-mer motif sites located within 5' untranslated region (5'UTR) as described in **Fig. 4A** except 1 kb region centered on motif sites are shown here. The nucleosome depletion occurs immediately upstream of the motif sites, likely due to NFR, but not within the motif sites. Arrowhead: 6-mer motif position.

***Supplemental Figure S5. Relationships between transcript abundance, nucleosome occupancy and DHS on two Type I motifs.***

***Supplemental Figure S6. PCC distances between motifs in the Type I, II, III sets.***

PCC distances are used to generate dendrograms with the Unweighted Pair Group Method with Arithmetic Mean for (A) type I, (B) type II, and (C) type III motifs.

***Supplemental Figure S7. Enrichment of in vivo TF binding sites overlapping with sites of Type I, II, and III motifs.***

Pink: 6-mer motif where its sites tend to overlap significantly with ChIP peaks of a TF (Heyndrickx et al. 2014) (adjusted *p-value*<1E-04; see **Methods**).

***Supplemental Figure S8. Nucleosome occupancy and RNA expression for COR-induced genes***

(A) The RNA expression changes of two known COR-induced genes *MYC2* and *JAZ10.1* (Lorenzo et al. 2004; Yan et al. 2007; Chung and Howe 2009). The 1-hr COR-treatment was chosen because *MYC2* and *JAZ10.1* were highly induced at 1-hr but not 30-min. The qRT-PCR results confirmed the RNA level induction detected by RNA-seq. (B) Comparison of transcript levels (Fragments Per Kilobase per Million fragments mapped, FPKM) between control and COR-treated samples for protein coding genes. Red: COR-induced genes (see **Methods**). (C) Differences in nucleosome occupancy between COR-treated and control samples. Y-axis: log ratio (base 2) of the average NOCs in the indicated regions between COR treatment and control. COR: coronatine. TSS and TTS: transcription start and transcription termination site.

# Supplemental Figure S1

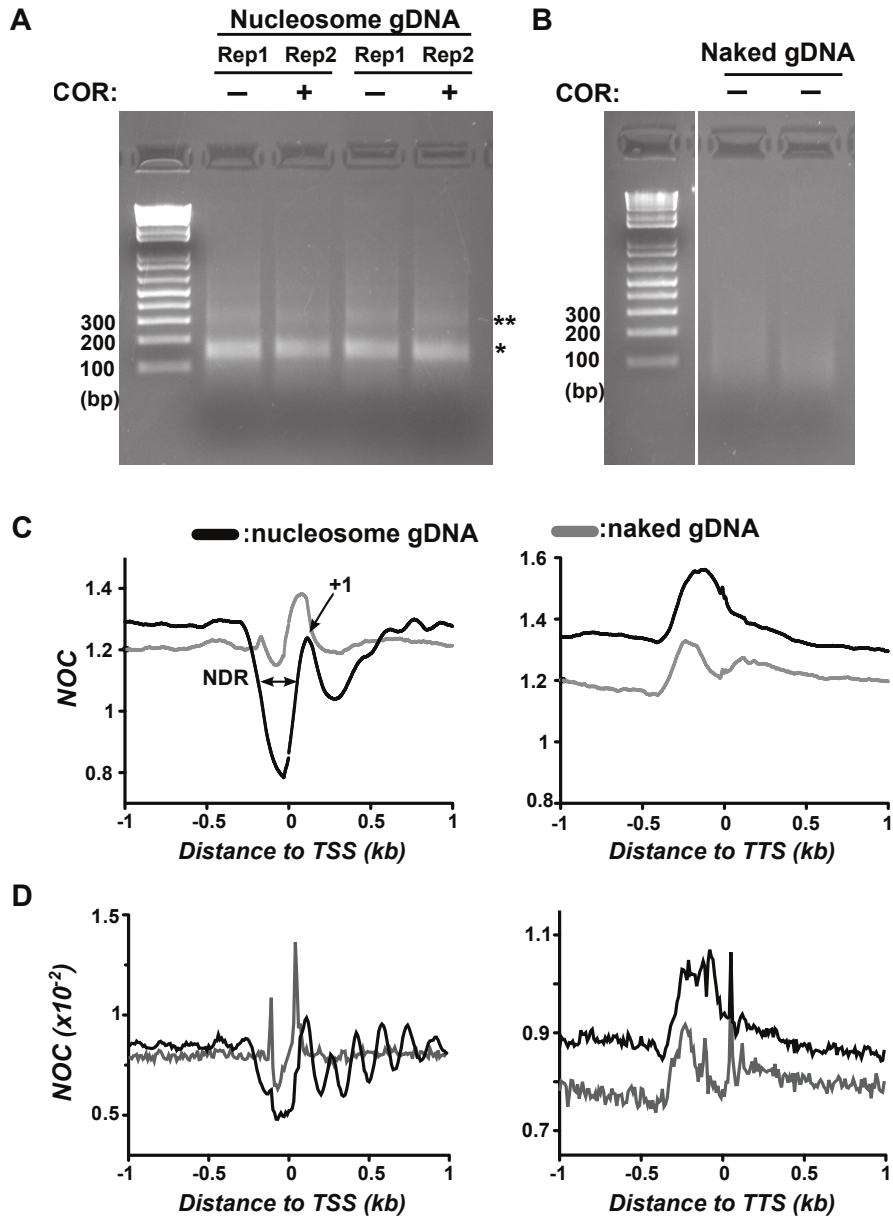

## Supplemental Figure S2

A

### Motif sites

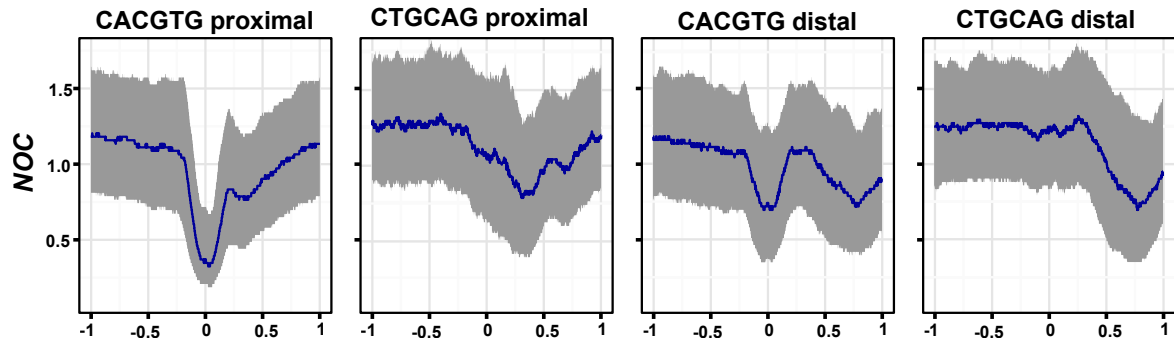

### Background

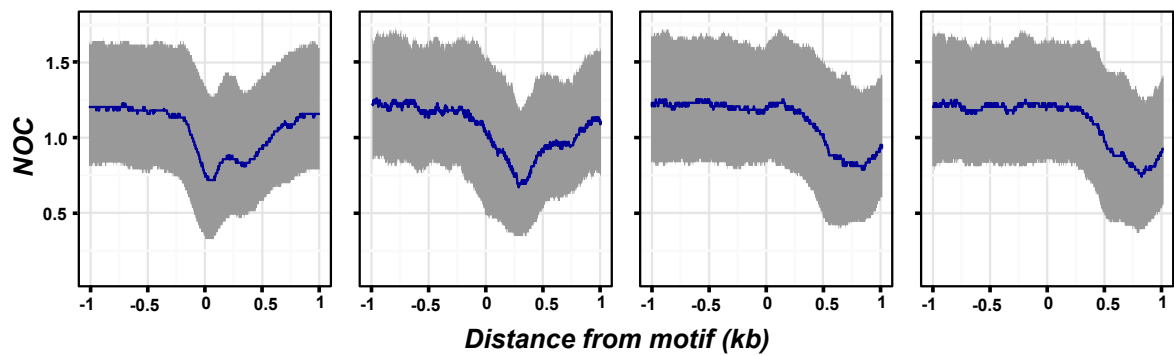

B

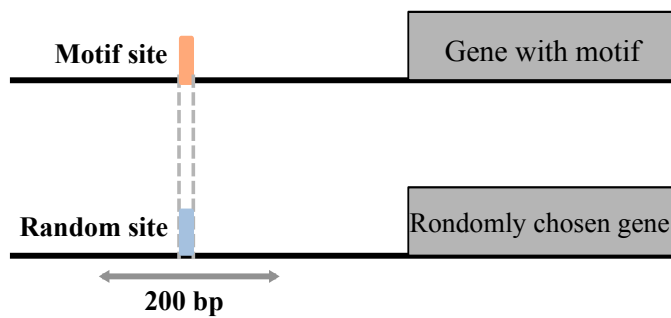

Regional nucleosome occupancy for each 6-mer site:

$\text{Log}_2$  (nucleosome occupancy with a 200-bp region centered on motif site/

nucleosome occupancy with a 200-bp region on the same coordinates of a randomly chosen gene)



**Supplemental Figure S3**

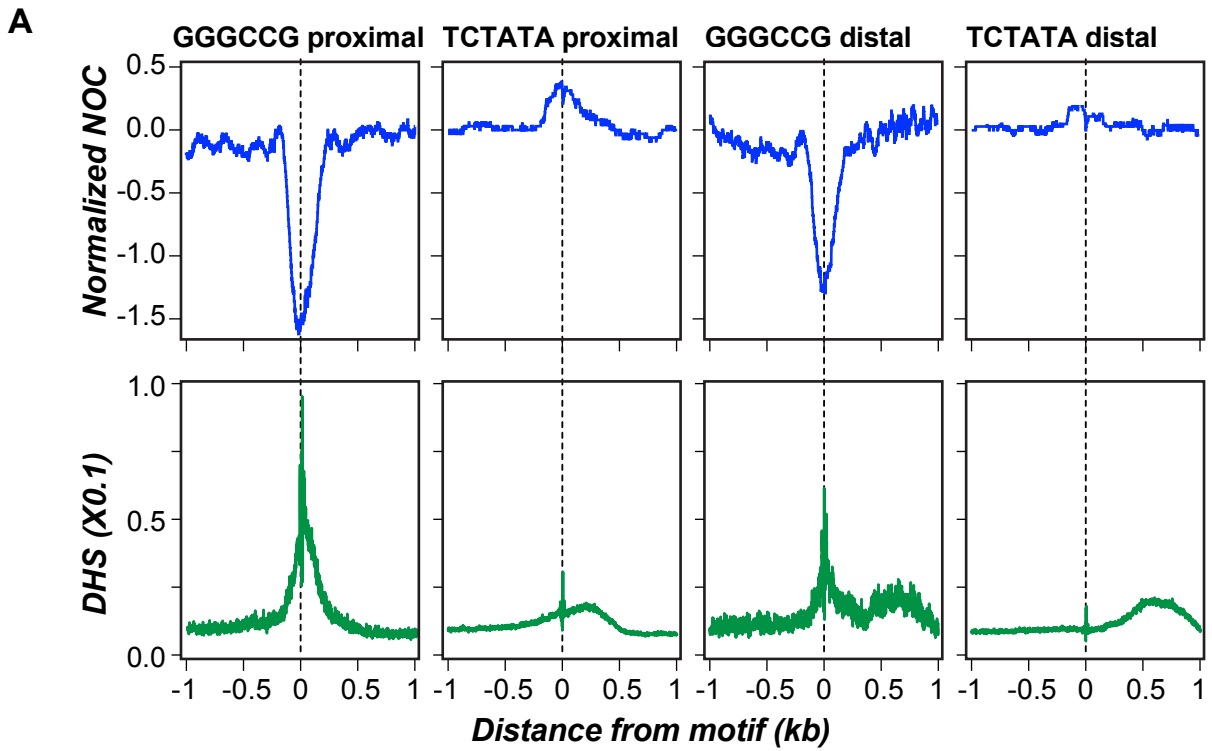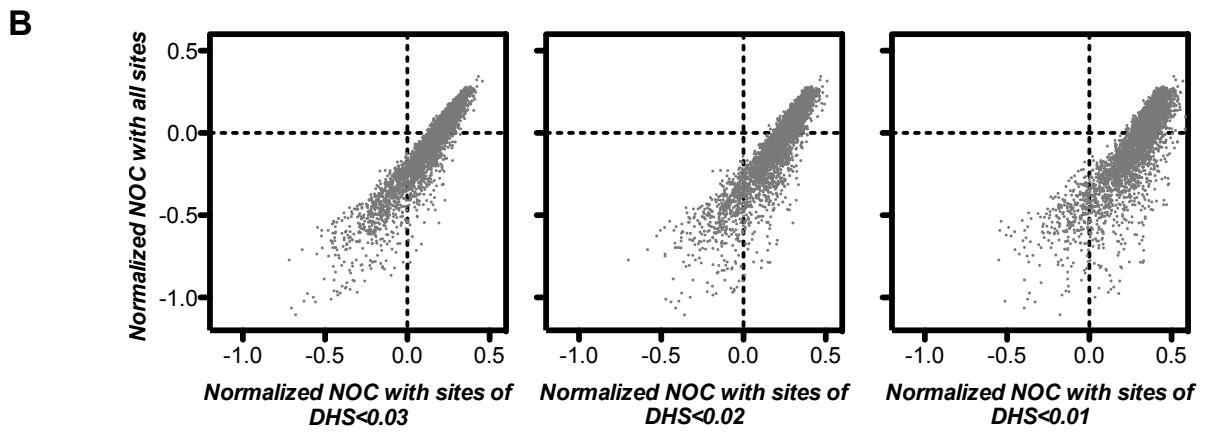

**Supplemental Figure S4**

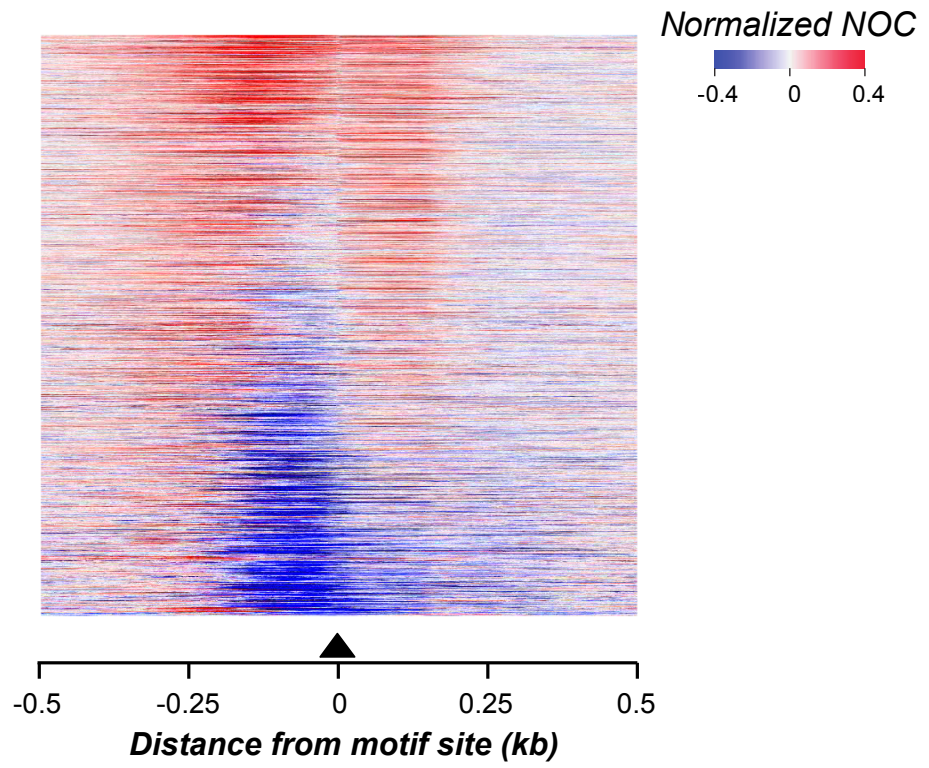

### Supplemental Figure S5

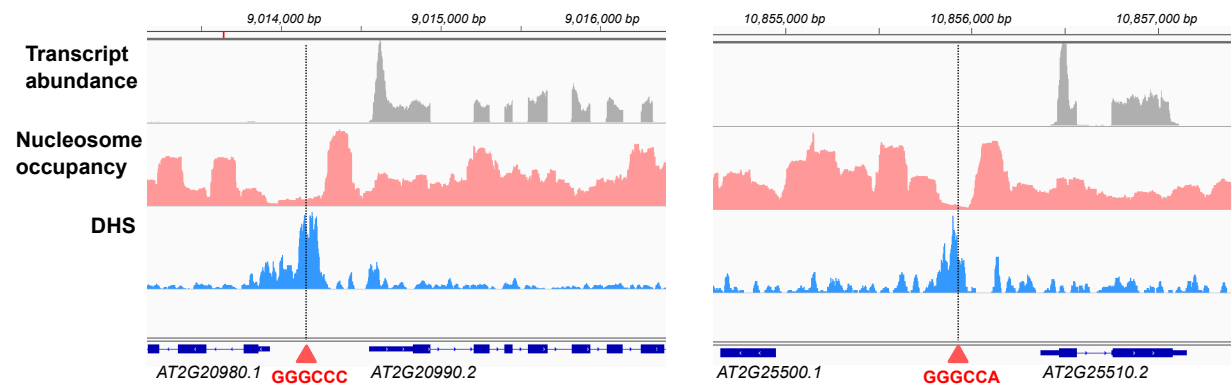



**Supplemental Figure S7**

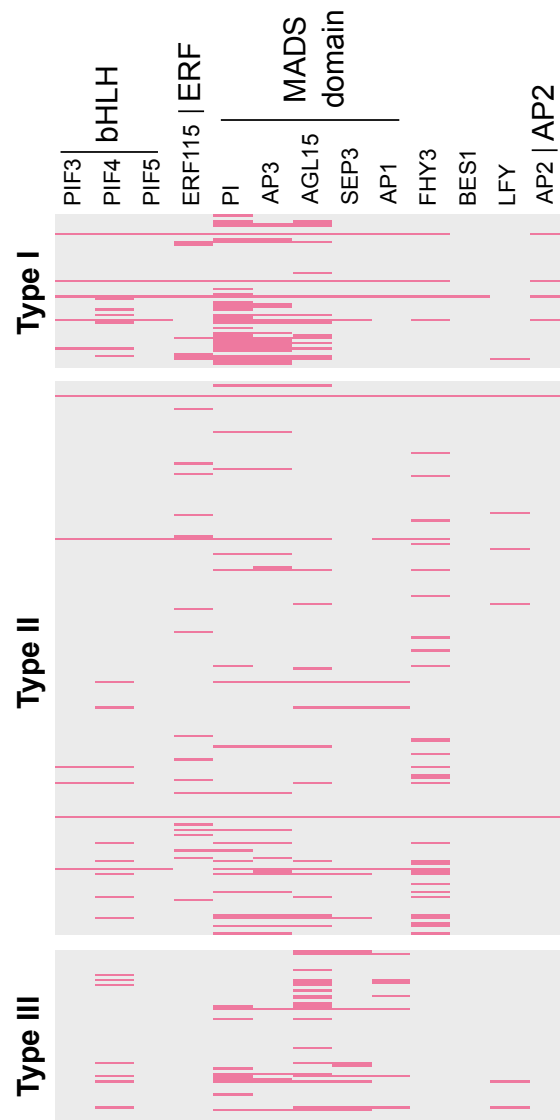

## Supplemental Figure S8

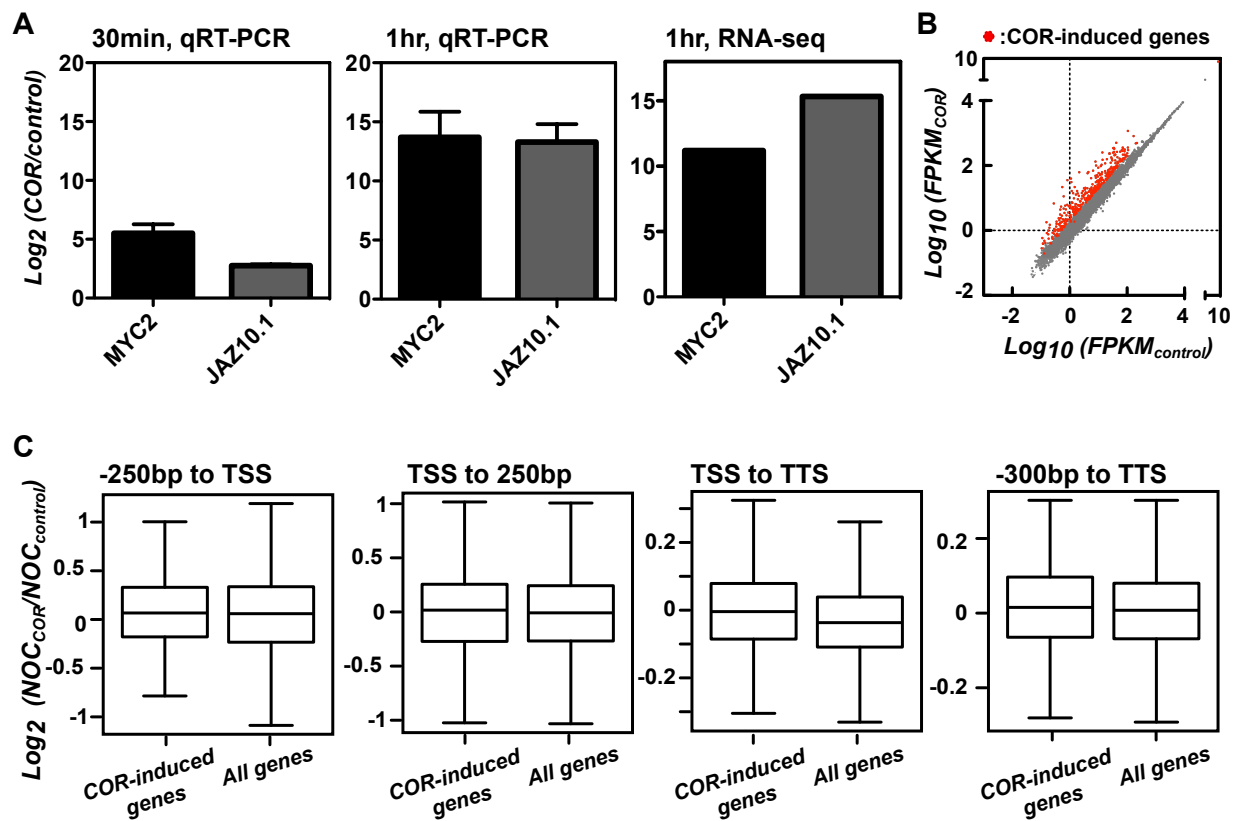

**Supplemental Table S1. Comparison of sequence-specific nucleosome occupancy amongst *A. thaliana*, rice and yeast**

| Region            | <i>A. thaliana</i> |                 | <i>A. thaliana</i> vs. rice |                 | <i>A. thaliana</i> vs. yeast |                 |
|-------------------|--------------------|-----------------|-----------------------------|-----------------|------------------------------|-----------------|
|                   | $\rho$             | <i>P</i> -value | $\rho$                      | <i>P</i> -value | $\rho$                       | <i>P</i> -value |
| Distal promoter   | 0.78               | <2.2e-16        | 0.21                        | <2.2e-16        | --                           | --              |
| Proximal promoter | NA                 | NA              | 0.61                        | <2.2e-16        | 0.12                         | 1.1E-13         |
| 5'UTR             | 0.77               | <2.2e-16        | 0.64                        | <2.2e-16        | --                           | --              |
| CDS               | 0.88               | <2.2e-16        | 0.71                        | <2.2e-16        | -0.08                        | 4.8E-07         |
| Intron            | 0.76               | <2.2e-16        | 0.43                        | <2.2e-16        | --                           | --              |
| 3'UTR             | 0.76               | <2.2e-16        | 0.43                        | <2.2e-16        | --                           | --              |
| TTS to +0.5kb     | 0.67               | <2.2e-16        | 0.37                        | <2.2e-16        | --                           | --              |

$\rho$ : Spearman's rank correlation coefficient determined by comparing of the median normalized NOC values of 6-mer sites located within proximal promoter regions and the values of sites located in other genomic regions in *A. thaliana* or between species. Only proximal promoter and CDS regions in yeast are included for comparison (See **Methods**). NA: Not applicable.

**Supplemental Table S2. Normalized NOC scores of Type I-III motifs as mentioned in Fig.**

5. \*: 6-mer motifs with PCC distance <0.38 are clustered together.

| Type I      |                      |                              |          | Type II     |                      |                              |          | Type III    |                      |                              |          |
|-------------|----------------------|------------------------------|----------|-------------|----------------------|------------------------------|----------|-------------|----------------------|------------------------------|----------|
| 6-mer motif | Normalized NOC score | -Log <sub>10</sub> (p-value) | Cluster* | 6-mer motif | Normalized NOC score | -Log <sub>10</sub> (p-value) | Cluster* | 6-mer motif | Normalized NOC score | -Log <sub>10</sub> (p-value) | Cluster* |
| GGGCCG      | -1.21                | 66.97                        | 1        | CGCGCT      | -1.07                | 31.71                        | 1        | GCCCGG      | -0.71                | 6.54                         | 1        |
| GGGCC       | -1.18                | 70.76                        | 1        | GCCCGC      | -1.02                | 10.80                        | 2        | TAACCG      | -0.46                | 46.22                        | 2        |
| GGCCCT      | -1.17                | 197.18                       | 2        | ACGGGC      | -1.02                | 27.74                        | 3        | GAGGCC      | -0.46                | 12.72                        | 3        |
| TGGGCC      | -1.15                | 278.08                       | 3        | GCGCGT      | -1.01                | 49.94                        | 4        | AAGGGC      | -0.45                | 17.55                        | 4        |
| GGCCCA      | -1.15                | 278.08                       | 3        | AGCGCG      | -0.98                | 24.49                        | 1        | CCCATT      | -0.45                | 64.65                        | 5        |
| CGGCC       | -1.14                | 72.33                        | 1        | CGGGCC      | -0.96                | 27.52                        | 5        | GGTCCA      | -0.45                | 28.80                        | 6        |
| AGGCC       | -1.09                | 217.38                       | 2        | ACGCGC      | -0.93                | 40.19                        | 4        | AGTGGG      | -0.45                | 22.81                        | 7        |
| GCCCAT      | -1.02                | 278.08                       | 4        | CGCGTG      | -0.93                | 40.26                        | 6        | AACGAC      | -0.43                | 48.01                        | 8        |
| GGGCTT      | -1.02                | 179.51                       | 5        | CAGGCC      | -0.91                | 34.17                        | 7        | TATCGG      | -0.42                | 16.75                        | 9        |
| AGCCCA      | -1.00                | 248.92                       | 3        | CCGGCC      | -0.90                | 26.32                        | 5        | CCGAAT      | -0.42                | 39.06                        | 10       |
| TTGGGC      | -1.00                | 228.95                       | 6        | CGGGCT      | -0.90                | 18.61                        | 1        | AAAGCC      | -0.41                | 55.74                        | 11       |
| GCCCAA      | -0.98                | 259.07                       | 6        | CGTCCG      | -0.86                | 23.60                        | 8        | TCCGAA      | -0.41                | 29.25                        | 12       |
| TGGCC       | -0.98                | 87.05                        | 1        | TCGGCC      | -0.86                | 34.74                        | 9        | GGGGTC      | -0.40                | 8.76                         | 13       |
| TGGGCT      | -0.98                | 237.06                       | 3        | GCGGCG      | -0.85                | 33.42                        | 10       | TCCGAC      | -0.38                | 16.92                        | 14       |
| GCCCAG      | -0.97                | 44.49                        | 6        | CGGTC       | -0.85                | 29.17                        | 6        | ATTCGG      | -0.37                | 25.53                        | 10       |
| AAGCCC      | -0.96                | 185.21                       | 5        | GGCCGG      | -0.84                | 27.54                        | 5        | CCAACG      | -0.36                | 18.76                        | 15       |
| GGCCCG      | -0.93                | 23.18                        | 7        | CGCGCC      | -0.84                | 19.57                        | 11       | GGCTTT      | -0.34                | 43.82                        | 11       |
| ATGGGC      | -0.93                | 220.32                       | 4        | GCGGGG      | -0.81                | 10.64                        | 12       | GACCCA      | -0.34                | 18.54                        | 13       |
| GCCACG      | -0.90                | 72.22                        | 8        | CCGGGT      | -0.81                | 29.89                        | 13       | TTGGGG      | -0.34                | 46.91                        | 16       |
| CTGGGC      | -0.88                | 40.93                        | 6        | GGCGCG      | -0.80                | 15.18                        | 11       | AATCCG      | -0.32                | 22.14                        | 17       |
| GCCAC       | -0.84                | 56.67                        | 6        | GGCGCC      | -0.80                | 16.40                        | 11       | AAAGGC      | -0.32                | 28.04                        | 4        |
| GGCCTG      | -0.84                | 29.02                        | 9        | CCCGGC      | -0.79                | 11.27                        | 14       | CCGACA      | -0.32                | 10.93                        | 18       |
| GTGGGC      | -0.84                | 53.41                        | 6        | CGGGTC      | -0.79                | 38.55                        | 15       | GTGGAC      | -0.32                | 15.75                        | 19       |
| TAGGCC      | -0.84                | 70.37                        | 9        | CACGCG      | -0.78                | 48.21                        | 6        | GTCCAG      | -0.31                | 9.37                         | 19       |
| GGCCTT      | -0.82                | 79.76                        | 9        | CGCGCG      | -0.78                | 15.74                        | 16       | GATGGG      | -0.31                | 13.13                        | 5        |
| AAGGCC      | -0.82                | 104.82                       | 9        | CGTGGC      | -0.78                | 63.10                        | 17       | ATCCGA      | -0.31                | 21.25                        | 20       |
| GGCCA       | -0.82                | 70.79                        | 1        | GACCCG      | -0.77                | 44.17                        | 15       | CCGAGA      | -0.30                | 13.52                        | 18       |
| CACGTG      | -0.81                | 170.82                       | 10       | CGCCGC      | -0.76                | 17.72                        | 18       | CCGTAA      | -0.28                | 12.47                        | 21       |
| GGGCTG      | -0.80                | 19.97                        | 5        | CGCCAC      | -0.76                | 40.70                        | 19       | CCAATA      | -0.26                | 29.37                        | 9        |
| AGCCCG      | -0.76                | 17.80                        | 7        | ACGGCG      | -0.76                | 49.33                        | 20       | GAGTGG      | -0.26                | 8.80                         | 22       |
| GGCCTA      | -0.74                | 65.72                        | 9        | TCGGGC      | -0.75                | 15.14                        | 9        | ACGAGG      | -0.25                | 8.79                         | 23       |
| AACCCG      | -0.74                | 125.74                       | 11       | CCCGGT      | -0.75                | 31.38                        | 21       | GGCTCA      | -0.25                | 11.62                        | 24       |
| GCCCGT      | -0.73                | 21.28                        | 4        | ACGCCG      | -0.75                | 36.32                        | 22       | GCTGAG      | -0.24                | 7.04                         | 25       |
| ACGTGG      | -0.72                | 85.56                        | 12       | TCGCGC      | -0.75                | 15.38                        | 23       | GGCTAA      | -0.22                | 6.94                         | 24       |
| GGGCTC      | -0.71                | 29.80                        | 5        | GGCCGT      | -0.74                | 23.19                        | 24       | ACCGAT      | -0.22                | 11.84                        | 26       |
| GGCCGA      | -0.70                | 27.19                        | 13       | CCACGC      | -0.74                | 28.39                        | 25       | TGCCAG      | -0.22                | 2.58                         | 27       |
| ACGCGG      | -0.68                | 18.90                        | 14       | GCGTCG      | -0.73                | 23.24                        | 26       | GCCAGA      | -0.21                | 5.73                         | 28       |
| GGGCTA      | -0.67                | 37.84                        | 5        | CGGCTG      | -0.73                | 21.08                        | 27       | TGGGGT      | -0.18                | 7.83                         | 29       |
| GTCGGG      | -0.67                | 18.39                        | 15       | CGCCGC      | -0.72                | 28.19                        | 10       | TGTGGC      | -0.18                | 3.01                         | 28       |
| ACGGCC      | -0.66                | 24.77                        | 13       | CCTGGC      | -0.72                | 11.84                        | 28       | AAGTGG      | -0.18                | 9.10                         | 30       |
| CGACGT      | -0.65                | 41.87                        | 12       | GCCGTT      | -0.71                | 55.62                        | 29       | TAAACG      | -0.17                | 14.16                        | 2        |
| GAACCG      | -0.65                | 62.14                        | 16       | GGCGGG      | -0.71                | 22.10                        | 30       | TAATCG      | -0.16                | 8.74                         | 2        |
| ACCCGA      | -0.61                | 43.91                        | 17       | CGCCGG      | -0.71                | 40.21                        | 31       | ATCGAA      | -0.16                | 11.81                        | 31       |
| ACCCGA      | -0.61                | 62.53                        | 18       | CGTCCG      | -0.71                | 31.78                        | 32       | AAATGG      | -0.15                | 17.28                        | 30       |
| ACCGGG      | -0.59                | 20.53                        | 18       | CGCGAC      | -0.71                | 12.63                        | 33       | GGATAA      | -0.14                | 6.07                         | 32       |
| CCGGAT      | -0.58                | 30.48                        | 11       | CCACGT      | -0.70                | 95.06                        | 34       | ATAAGG      | -0.13                | 5.19                         | 33       |
| AGGCCT      | -0.58                | 29.34                        | 2        | CGACGC      | -0.70                | 20.83                        | 26       | CCACAG      | -0.12                | 2.24                         | 34       |
| AGCCGT      | -0.58                | 27.74                        | 19       | CCGGTT      | -0.70                | 114.12                       | 35       | AAATCC      | -0.10                | 7.92                         | 11       |
| AACGGC      | -0.58                | 49.97                        | 20       | GGGTCG      | -0.69                | 25.49                        | 36       | ATCCAA      | -0.10                | 7.69                         | 35       |
| ATTGGG      | -0.57                | 83.52                        | 21       | GTCCCG      | -0.69                | 12.57                        | 37       | AGTGGG      | -0.09                | 3.68                         | 7        |
| ACTGGG      | -0.57                | 17.73                        | 21       | CGCGGC      | -0.69                | 12.46                        | 10       | ATGCCA      | -0.08                | 1.59                         | 36       |
| CGTGTC      | -0.56                | 45.60                        | 8        | GAGCCC      | -0.69                | 29.26                        | 38       | CATACG      | -0.07                | 1.15                         | 37       |
| AACCGA      | -0.56                | 103.65                       | 17       | CGCCGA      | -0.69                | 27.37                        | 39       | TTATCC      | -0.06                | 2.67                         | 32       |
| AGCCGG      | -0.56                | 14.69                        | 19       | CGGCCG      | -0.68                | 14.94                        | 8        | GTCCAT      | -0.06                | 1.58                         | 19       |
| AATGGG      | -0.54                | 90.11                        | 21       | CGCCGT      | -0.68                | 41.83                        | 20       | TATCCA      | -0.06                | 2.55                         | 38       |
| CCCAAT      | -0.53                | 83.95                        | 21       | CGTGCC      | -0.68                | 15.77                        | 17       | GATAAG      | -0.03                | 0.68                         | 39       |
| CCGAAA      | -0.52                | 61.02                        | 22       | CCGAAC      | -0.68                | 56.85                        | 40       | ATGTGG      | -0.03                | 0.87                         | 34       |
| CGGTGG      | -0.51                | 25.63                        | 23       | CGGTTC      | -0.68                | 63.72                        | 41       | ATCCTA      | -0.02                | 0.47                         | 35       |
| CCACCG      | -0.50                | 29.72                        | 23       | CGTGGG      | -0.67                | 21.55                        | 42       | AAAATC      | -0.02                | 2.69                         | 40       |
|             |                      |                              |          | CCGCCG      | -0.67                | 29.33                        | 31       | AATTGA      | -0.01                | 0.56                         | 41       |
|             |                      |                              |          | GCGCCA      | -0.67                | 21.02                        | 18       | AGAGTG      | 0.02                 | 0.32                         | 42       |



|        |       |       |    |        |      |      |    |
|--------|-------|-------|----|--------|------|------|----|
| TGGCGC | -0.67 | 21.87 | 18 | ATCAGA | 0.02 | 0.72 | 20 |
| CGACCC | -0.67 | 27.45 | 36 | TCAGAA | 0.03 | 0.79 | 12 |
| ACCGGC | -0.67 | 25.64 | 3  | ATTAAA | 0.03 | 3.10 | 43 |
| CCCACG | -0.66 | 31.78 | 42 | AAAATG | 0.03 | 1.50 | 40 |
| CTGGCC | -0.66 | 14.28 | 5  | CTTATC | 0.04 | 0.47 | 39 |
| GCCGGA | -0.66 | 32.67 | 43 |        |      |      |    |
| ACGTCG | -0.66 | 46.56 | 26 |        |      |      |    |
| CGGACC | -0.65 | 16.21 | 44 |        |      |      |    |
| GCGCTC | -0.65 | 12.07 | 45 |        |      |      |    |
| CAGCCC | -0.65 | 21.41 | 38 |        |      |      |    |
| GCGCGA | -0.64 | 12.58 | 23 |        |      |      |    |
| CCGTCC | -0.64 | 21.81 | 46 |        |      |      |    |
| CCCGGA | -0.64 | 11.69 | 14 |        |      |      |    |
| CGCGCA | -0.64 | 12.81 | 47 |        |      |      |    |
| GACGCG | -0.64 | 15.35 | 6  |        |      |      |    |
| TCGCCG | -0.64 | 39.80 | 22 |        |      |      |    |
| GCGGGA | -0.64 | 24.40 | 23 |        |      |      |    |
| TAGCGC | -0.63 | 10.50 | 48 |        |      |      |    |
| CGCACG | -0.63 | 19.69 | 16 |        |      |      |    |
| GTGCCG | -0.63 | 12.23 | 37 |        |      |      |    |
| GAGCGC | -0.63 | 10.90 | 45 |        |      |      |    |
| CCCGCT | -0.62 | 13.47 | 30 |        |      |      |    |
| GGTTCG | -0.62 | 52.97 | 36 |        |      |      |    |
| GGCCCT | -0.62 | 17.27 | 49 |        |      |      |    |
| GGTCCG | -0.62 | 17.07 | 44 |        |      |      |    |
| CCGAGC | -0.62 | 11.21 | 40 |        |      |      |    |
| GGGACC | -0.62 | 21.33 | 50 |        |      |      |    |
| GCCGGT | -0.62 | 26.91 | 3  |        |      |      |    |
| CGACCG | -0.62 | 12.99 | 8  |        |      |      |    |
| TCGCGG | -0.61 | 11.05 | 51 |        |      |      |    |
| CAGGCG | -0.61 | 10.10 | 7  |        |      |      |    |
| CGTCGT | -0.61 | 57.66 | 32 |        |      |      |    |
| CGCTCG | -0.61 | 11.80 | 16 |        |      |      |    |
| CCCGGG | -0.61 | 10.38 | 14 |        |      |      |    |
| CCGACG | -0.61 | 28.35 | 32 |        |      |      |    |
| GCCGGG | -0.61 | 13.21 | 14 |        |      |      |    |
| GGGTCC | -0.61 | 23.69 | 52 |        |      |      |    |
| GCCGCG | -0.61 | 12.04 | 10 |        |      |      |    |
| CGGCGA | -0.60 | 43.43 | 22 |        |      |      |    |
| TCCCGC | -0.60 | 21.35 | 23 |        |      |      |    |
| CCGTCC | -0.60 | 31.59 | 26 |        |      |      |    |
| CCGCGT | -0.60 | 14.56 | 4  |        |      |      |    |
| CGCGTT | -0.60 | 19.72 | 53 |        |      |      |    |
| CGCCGG | -0.60 | 27.71 | 39 |        |      |      |    |
| GCGGAG | -0.60 | 18.54 | 12 |        |      |      |    |
| AGCGGG | -0.60 | 11.61 | 30 |        |      |      |    |
| CGGCGT | -0.59 | 25.71 | 22 |        |      |      |    |
| GACGGC | -0.59 | 26.46 | 54 |        |      |      |    |
| GCGCCT | -0.59 | 10.08 | 18 |        |      |      |    |
| CCGGCG | -0.59 | 27.82 | 39 |        |      |      |    |
| GGCGGA | -0.59 | 19.30 | 43 |        |      |      |    |
| CCGGAC | -0.59 | 15.88 | 55 |        |      |      |    |
| ACGACG | -0.59 | 54.12 | 32 |        |      |      |    |
| TCGCGT | -0.59 | 15.38 | 4  |        |      |      |    |
| GCCGGC | -0.59 | 19.41 | 56 |        |      |      |    |
| CAGCCG | -0.59 | 17.46 | 27 |        |      |      |    |
| TCCGGC | -0.59 | 23.19 | 43 |        |      |      |    |
| CCCAGT | -0.58 | 19.14 | 57 |        |      |      |    |
| GTTCGG | -0.58 | 40.82 | 40 |        |      |      |    |
| GAGCCG | -0.58 | 17.73 | 41 |        |      |      |    |
| GACGTC | -0.58 | 34.29 | 54 |        |      |      |    |
| CGGCAG | -0.58 | 11.64 | 58 |        |      |      |    |
| ACCCGG | -0.58 | 26.92 | 13 |        |      |      |    |
| CCCGAA | -0.58 | 28.38 | 59 |        |      |      |    |
| GCCGTC | -0.58 | 25.29 | 54 |        |      |      |    |
| TCGGGT | -0.58 | 30.64 | 13 |        |      |      |    |
| CGGTCC | -0.58 | 20.55 | 52 |        |      |      |    |
| TCCGCC | -0.58 | 20.76 | 43 |        |      |      |    |
| GTCCGC | -0.58 | 10.05 | 2  |        |      |      |    |

|        |       |       |    |
|--------|-------|-------|----|
| CTCGCG | -0.58 | 10.87 | 33 |
| CGTCGC | -0.57 | 22.91 | 32 |
| CGAACC | -0.57 | 50.63 | 36 |
| GGCGTC | -0.57 | 12.80 | 54 |
| CCGGTC | -0.57 | 21.73 | 60 |
| CGACGG | -0.57 | 34.87 | 26 |
| TACCCG | -0.57 | 14.59 | 15 |
| CCAGGC | -0.57 | 11.70 | 28 |
| GACCGG | -0.57 | 21.11 | 60 |
| TGACGG | -0.57 | 23.99 | 61 |
| ACCGTC | -0.57 | 29.44 | 62 |
| TAGCCC | -0.57 | 28.18 | 48 |
| GGCGCA | -0.57 | 13.68 | 11 |
| CACCGG | -0.56 | 25.10 | 63 |
| CGGCAC | -0.56 | 13.25 | 37 |
| AACCCG | -0.56 | 35.17 | 64 |
| ACGGCA | -0.56 | 20.58 | 20 |
| CGGAGG | -0.56 | 22.28 | 31 |
| GGACCG | -0.56 | 22.79 | 52 |
| TCGGCG | -0.56 | 22.70 | 39 |
| CGCGTA | -0.56 | 15.35 | 47 |
| CTCCGC | -0.56 | 17.75 | 12 |
| GACACG | -0.56 | 42.21 | 17 |
| GCCGCC | -0.56 | 18.42 | 56 |
| CGGACG | -0.56 | 11.76 | 8  |
| CGGCTC | -0.56 | 20.20 | 41 |
| GGCACG | -0.55 | 12.07 | 17 |
| GCTGCG | -0.55 | 10.42 | 65 |
| GACGCC | -0.55 | 17.85 | 54 |
| ATCGCG | -0.55 | 14.04 | 33 |
| CCGGGA | -0.55 | 15.74 | 51 |
| TACGGC | -0.55 | 12.03 | 29 |
| ACCGGT | -0.55 | 62.80 | 21 |
| GGCTCG | -0.55 | 14.27 | 36 |
| AGGCGG | -0.55 | 16.39 | 66 |
| CCCGAC | -0.55 | 15.12 | 59 |
| CCCGCC | -0.55 | 15.49 | 30 |
| CGGTCT | -0.54 | 15.83 | 8  |
| GGTCGC | -0.54 | 10.79 | 50 |
| CCCGAG | -0.54 | 14.72 | 59 |
| AGGGCC | -0.54 | 12.56 | 49 |
| GGCGAC | -0.54 | 16.17 | 67 |
| CGCGGA | -0.54 | 12.20 | 47 |
| TTCCGG | -0.54 | 35.16 | 55 |
| GCAGCG | -0.54 | 12.67 | 10 |
| ATCCGG | -0.54 | 27.47 | 35 |
| ACGCGA | -0.54 | 15.43 | 4  |
| GGCGGC | -0.54 | 17.46 | 56 |
| GTCGGC | -0.53 | 18.89 | 68 |
| GACGGT | -0.53 | 33.25 | 62 |
| GGACGG | -0.53 | 13.76 | 46 |
| TGCGGC | -0.53 | 10.27 | 69 |
| GCTCCG | -0.53 | 15.28 | 65 |
| CGCGAA | -0.53 | 15.17 | 47 |
| CCCGAT | -0.53 | 12.89 | 59 |
| GCGTGG | -0.53 | 17.27 | 25 |
| AGGCCG | -0.52 | 12.52 | 66 |
| ACCCGC | -0.52 | 12.47 | 13 |
| GCCGTA | -0.52 | 13.87 | 29 |
| TTCGCG | -0.52 | 15.34 | 47 |
| CTGACG | -0.52 | 19.55 | 58 |
| GCGACG | -0.52 | 22.65 | 32 |
| GACGGG | -0.52 | 10.96 | 70 |
| GTGGCG | -0.52 | 21.54 | 19 |
| AAGGCG | -0.52 | 18.10 | 53 |
| CGAGCC | -0.52 | 16.09 | 36 |
| GGTCGG | -0.52 | 20.40 | 40 |
| GTGGCC | -0.51 | 19.81 | 67 |
| AGCGGC | -0.51 | 10.54 | 69 |

|        |       |        |    |
|--------|-------|--------|----|
| AAACCG | -0.51 | 113.03 | 64 |
| TTCGGG | -0.51 | 20.71  | 59 |
| GGCGGT | -0.51 | 14.54  | 24 |
| CCGCCA | -0.51 | 24.61  | 61 |
| TGGCGG | -0.51 | 22.30  | 61 |
| CCGGAG | -0.51 | 26.39  | 55 |
| CCGACC | -0.51 | 28.48  | 40 |
| CCGGCT | -0.51 | 13.93  | 35 |
| ACGTGT | -0.50 | 59.44  | 34 |
| CAGCGG | -0.50 | 11.38  | 63 |
| GCCGAG | -0.50 | 13.62  | 68 |
| CGGGAC | -0.50 | 10.78  | 37 |
| CCGTCA | -0.50 | 20.02  | 61 |
| CCCGTT | -0.50 | 20.78  | 70 |

**Supplemental Table S3. Nucleosome occupancy for 31 6-mer motifs enriched in COR-induced genes**

| Motif  | Motif occurrence (%) <sup>1</sup> |           |                              | Control <sup>2</sup> |                              | COR <sup>2</sup> |                              | COR vs. control              |
|--------|-----------------------------------|-----------|------------------------------|----------------------|------------------------------|------------------|------------------------------|------------------------------|
|        | COR-induced genes                 | All genes | <i>P</i> -value <sup>3</sup> | Normalized NOC       | <i>P</i> -value <sup>4</sup> | Normalized NOC   | <i>P</i> -value <sup>4</sup> | <i>P</i> -value <sup>5</sup> |
| GCACGT | 8.2                               | 3.3       | 1.5E-03                      | -0.23                | 1.0E-01                      | -0.58            | 1.0E-01                      | 5.0E-01                      |
| ATACAT | 32.8                              | 23.7      | 7.5E-03                      | 0.30                 | 3.2E-05                      | 0.28             | 1.2E-06                      | 5.0E-01                      |
| GTACAC | 12.6                              | 5.7       | 2.4E-04                      | 0.02                 | 3.9E-01                      | 0.00             | 4.1E-01                      | 5.0E-01                      |
| ACGTGT | 25.7                              | 11.2      | 3.1E-11                      | -0.24                | 1.9E-01                      | -0.25            | 1.7E-01                      | 5.0E-01                      |
| ACACGT | 24.6                              | 11.4      | 1.6E-09                      | -0.30                | 1.2E-02                      | -0.31            | 4.5E-02                      | 5.0E-01                      |
| CACGTG | 27.9                              | 12.2      | 3.3E-12                      | -0.49                | 1.2E-05                      | -0.46            | 1.4E-04                      | 5.0E-01                      |
| ACGTTT | 22.7                              | 13.4      | 3.0E-04                      | -0.08                | 4.9E-01                      | -0.02            | 4.4E-01                      | 5.0E-01                      |
| CTATAT | 37.7                              | 22.4      | 2.5E-08                      | 0.27                 | 9.0E-03                      | 0.32             | 3.6E-05                      | 5.0E-01                      |
| TCTATA | 33.6                              | 21.9      | 8.2E-05                      | 0.26                 | 1.0E-02                      | 0.32             | 1.4E-04                      | 5.0E-01                      |
| ACATAA | 38.8                              | 27.3      | 3.3E-04                      | 0.22                 | 1.9E-02                      | 0.30             | 2.2E-04                      | 5.0E-01                      |
| CATATA | 39.1                              | 27.0      | 1.5E-04                      | 0.20                 | 5.3E-04                      | 0.28             | 1.6E-06                      | 5.0E-01                      |
| AAACGT | 23.2                              | 14.9      | 2.7E-03                      | -0.14                | 3.6E-01                      | -0.06            | 4.3E-01                      | 5.0E-01                      |
| CGTGTG | 12.0                              | 5.1       | 7.0E-05                      | -0.05                | 4.9E-01                      | 0.04             | 4.7E-01                      | 5.0E-01                      |
| CACGTT | 18.3                              | 6.9       | 5.5E-10                      | -0.29                | 2.4E-01                      | -0.19            | 3.2E-01                      | 5.0E-01                      |
| TATATA | 65.0                              | 46.5      | 9.9E-10                      | 0.21                 | 2.3E-07                      | 0.31             | 2.8E-15                      | 5.0E-01                      |
| AACGTG | 22.1                              | 7.4       | 6.6E-15                      | -0.14                | 4.3E-01                      | -0.04            | 5.0E-01                      | 5.0E-01                      |
| CTCGTG | 10.7                              | 4.6       | 4.4E-04                      | -0.09                | 4.9E-01                      | 0.02             | 4.9E-01                      | 5.0E-01                      |
| TATAAA | 65.3                              | 50.0      | 1.6E-06                      | 0.12                 | 2.3E-02                      | 0.22             | 1.4E-05                      | 5.0E-01                      |
| ATATAA | 57.4                              | 45.4      | 6.6E-04                      | 0.11                 | 1.4E-02                      | 0.22             | 8.6E-07                      | 5.0E-01                      |
| ATAAAT | 60.9                              | 49.9      | 2.4E-03                      | 0.06                 | 1.8E-01                      | 0.18             | 1.8E-03                      | 5.0E-01                      |
| AACACG | 16.4                              | 8.5       | 2.7E-04                      | -0.35                | 1.5E-01                      | -0.23            | 3.0E-01                      | 5.0E-01                      |
| TAAATA | 58.2                              | 45.6      | 3.0E-04                      | 0.09                 | 2.4E-01                      | 0.21             | 2.2E-04                      | 5.0E-01                      |
| CGTGTT | 14.5                              | 7.2       | 3.2E-04                      | -0.23                | 2.8E-01                      | -0.09            | 3.5E-01                      | 5.0E-01                      |
| CTATAA | 29.5                              | 20.8      | 8.0E-03                      | 0.19                 | 4.8E-02                      | 0.32             | 7.1E-03                      | 5.0E-01                      |
| ATATAT | 64.5                              | 46.2      | 1.6E-09                      | 0.14                 | 4.0E-05                      | 0.28             | 8.2E-13                      | 5.0E-01                      |
| TATAGT | 28.1                              | 18.9      | 2.2E-03                      | 0.21                 | 2.7E-03                      | 0.35             | 9.6E-04                      | 5.0E-01                      |
| TAATAT | 49.7                              | 38.3      | 1.2E-03                      | 0.08                 | 1.0E-02                      | 0.22             | 1.6E-06                      | 5.0E-01                      |
| CCACGT | 18.3                              | 9.2       | 2.8E-05                      | -0.44                | 3.7E-02                      | -0.29            | 8.8E-02                      | 5.0E-01                      |
| ACGTGG | 15.8                              | 8.6       | 1.2E-03                      | -0.54                | 1.8E-02                      | -0.36            | 5.8E-03                      | 5.0E-01                      |
| ACACAT | 28.7                              | 19.1      | 1.2E-03                      | 0.08                 | 1.3E-01                      | 0.29             | 1.0E-02                      | 5.0E-01                      |
| ACGTGC | 8.7                               | 3.5       | 5.9E-04                      | -0.34                | 1.8E-01                      | -0.03            | 4.4E-01                      | 5.0E-01                      |

1. Motif occurrence is defined as the percentage of genes in the specified category (COR or all) with a particular motif.
2. COR: coronatine. Control: water-treated.
3. Multiple testing corrected *p*-value of one-tailed Fisher's exact test testing motif enrichment.
4. Multiple testing corrected *p*-value of Mann-Whitney test comparing the NOC scores between motif sites.
5. Multiple testing corrected *p*-values of Mann-Whitney tests comparing the NOC score distributions of motif sites between COR and control samples.

**Supplemental Table S4. Summary of sequence mapping steps of nucleosome gDNA, naked gDNA and total RNA samples**

| Read processing and coverage     | Biological replicates | Nucleosome gDNA |            | Naked gDNA | Total RNA  |            |
|----------------------------------|-----------------------|-----------------|------------|------------|------------|------------|
|                                  |                       | Control         | COR        | Control    | Control    | COR        |
| Raw                              | Rep1                  | 65,695,220      | 59,383,778 | 36,896,109 | 42,376,288 | 37,967,991 |
|                                  | Rep2                  | 66,553,178      | 68,659,109 |            | 37,172,743 | 31,708,672 |
| Quality-filtered                 | Rep1                  | 64,559,815      | 58,114,258 | 36,243,664 | 42,258,986 | 37,877,552 |
|                                  | Rep2                  | 65,759,890      | 67,432,786 |            | 37,076,671 | 31,647,268 |
| Mapped                           | Rep1                  | 45,141,036      | 40,323,706 | 25,929,703 | 37,132,426 | 33,490,924 |
|                                  | Rep2                  | 44,824,610      | 46,075,949 |            | 32,5418,87 | 28,171,953 |
| 140-170 bp                       | Rep1                  | 20,743,892      | 18,043,667 | 3,973,487  | --         | --         |
|                                  | Rep2                  | 22,326,177      | 22,967,677 |            | --         | --         |
| Sequencing coverage <sup>1</sup> | Rep1                  | 56.83           | 50.40      | 32.41      | --         | --         |
|                                  | Rep2                  | 56.03           | 57.59      |            | --         | --         |

1. Sequencing coverage of nucleosome and naked gDNA of the *A. thaliana* genome (119,146,348 bp). The length of mapped paired-end fragments was assumed to be 150 bp.

*Supplemental Table S5. Pearson's correlation coefficients of genome-wide nucleosome occupancy among nucleosome gDNA samples.*

| Sample       | Control#rep1 | Control#rep2 | COR#rep1 | COR#rep2 | Naked gDNA |
|--------------|--------------|--------------|----------|----------|------------|
| Control#rep1 | --           | --           | --       | --       | --         |
| Control#rep2 | 0.976        | --           | --       | --       | --         |
| COR#rep1     | 0.965        | 0.971        | --       | --       | --         |
| COR#rep2     | 0.965        | 0.973        | 0.965    | --       | --         |
| Naked gDNA   | 0.652        | 0.649        | 0.634    | 0.632    | --         |

**Supplemental Table S6. Variance inflation factors (VIFs) and regression coefficients of nucleosome and naked gDNA samples for linear regression model with 50 bp, 100 bp and 250 bp bin size.**

| Nucleosome gDNA, bin size= 50 bp |                       |      |                        |
|----------------------------------|-----------------------|------|------------------------|
| Central position of bin          | Gene end <sup>1</sup> | VIF  | Regression coefficient |
| -975                             | 5'                    | 5.3  | 0.2                    |
| -925                             | 5'                    | 14.3 | 0.0                    |
| -875                             | 5'                    | 14.5 | -0.1                   |
| -825                             | 5'                    | 15.9 | 0.1                    |
| -775                             | 5'                    | 21.3 | -0.1                   |
| -725                             | 5'                    | 21.9 | 0.0                    |
| -675                             | 5'                    | 22.0 | 0.1                    |
| -625                             | 5'                    | 26.1 | 0.0                    |
| -575                             | 5'                    | 27.0 | -0.1                   |
| -525                             | 5'                    | 27.0 | 0.1                    |
| -475                             | 5'                    | 32.0 | 0.1                    |
| -425                             | 5'                    | 33.7 | -0.3                   |
| -375                             | 5'                    | 32.7 | 0.1                    |
| -325                             | 5'                    | 36.4 | 0.1                    |
| -275                             | 5'                    | 41.6 | -0.3                   |
| -225                             | 5'                    | 41.0 | 0.3                    |
| -175                             | 5'                    | 39.1 | 0.1                    |
| -125                             | 5'                    | 35.0 | -0.5                   |
| -75                              | 5'                    | 31.4 | 0.0                    |
| -25                              | 5'                    | 30.6 | -0.1                   |
| 25                               | 5'                    | 33.4 | -0.9                   |
| 75                               | 5'                    | 38.8 | 0.2                    |
| 125                              | 5'                    | 43.9 | 0.3                    |
| 175                              | 5'                    | 35.9 | -0.3                   |
| 225                              | 5'                    | 29.8 | 0.2                    |
| 275                              | 5'                    | 33.0 | 0.0                    |
| 325                              | 5'                    | 29.0 | -0.2                   |
| 375                              | 5'                    | 27.4 | 0.1                    |
| 425                              | 5'                    | 33.8 | -0.2                   |
| 475                              | 5'                    | 30.5 | 0.1                    |
| 525                              | 5'                    | 25.2 | 0.0                    |
| 575                              | 5'                    | 30.2 | -0.2                   |
| 625                              | 5'                    | 28.1 | 0.2                    |
| 675                              | 5'                    | 21.5 | -0.1                   |
| 725                              | 5'                    | 23.9 | -0.1                   |
| 775                              | 5'                    | 23.0 | 0.1                    |
| 825                              | 5'                    | 15.4 | -0.2                   |
| 875                              | 5'                    | 14.3 | 0.0                    |
| 925                              | 5'                    | 14.4 | 0.1                    |
| 975                              | 5'                    | 5.3  | -0.3                   |
| -975                             | 3'                    | 4.7  | -0.2                   |
| -925                             | 3'                    | 12.3 | 0.1                    |
| -875                             | 3'                    | 13.6 | 0.0                    |
| -825                             | 3'                    | 15.1 | -0.2                   |
| -775                             | 3'                    | 19.3 | 0.1                    |
| -725                             | 3'                    | 20.3 | 0.0                    |
| -675                             | 3'                    | 20.9 | -0.1                   |
| -625                             | 3'                    | 24.0 | 0.1                    |
| -575                             | 3'                    | 24.5 | 0.0                    |
| -525                             | 3'                    | 25.1 | -0.1                   |
| -475                             | 3'                    | 27.6 | 0.1                    |
| -425                             | 3'                    | 27.6 | 0.0                    |
| -375                             | 3'                    | 27.2 | -0.2                   |
| -325                             | 3'                    | 30.1 | 0.1                    |
| -275                             | 3'                    | 33.7 | 0.1                    |
| -225                             | 3'                    | 36.1 | -0.1                   |
| -175                             | 3'                    | 37.2 | 0.1                    |
| -125                             | 3'                    | 35.5 | 0.0                    |
| -75                              | 3'                    | 33.9 | -0.1                   |
| -25                              | 3'                    | 34.6 | 0.0                    |
| 25                               | 3'                    | 35.2 | 0.0                    |
| 75                               | 3'                    | 35.7 | 0.0                    |

| 125                              | 3'                    | 37.7 | -0.2                   |
|----------------------------------|-----------------------|------|------------------------|
| 175                              | 3'                    | 38.0 | 0.0                    |
| 225                              | 3'                    | 35.8 | 0.0                    |
| 275                              | 3'                    | 35.9 | -0.1                   |
| 325                              | 3'                    | 34.0 | 0.0                    |
| 375                              | 3'                    | 32.1 | 0.0                    |
| 425                              | 3'                    | 33.2 | -0.1                   |
| 475                              | 3'                    | 31.1 | 0.1                    |
| 525                              | 3'                    | 28.5 | 0.0                    |
| 575                              | 3'                    | 29.5 | -0.1                   |
| 625                              | 3'                    | 27.7 | 0.1                    |
| 675                              | 3'                    | 23.0 | 0.0                    |
| 725                              | 3'                    | 22.0 | 0.0                    |
| 775                              | 3'                    | 21.1 | 0.0                    |
| 825                              | 3'                    | 16.5 | 0.0                    |
| 875                              | 3'                    | 15.2 | 0.0                    |
| 925                              | 3'                    | 13.9 | 0.0                    |
| 975                              | 3'                    | 5.0  | 0.0                    |
| Nucleosome gDNA, bin size=100 bp |                       |      |                        |
| Central position of bin          | Gene end <sup>1</sup> | VIF  | Regression coefficient |
| -950                             | 5'                    | 1.7  | 0.0                    |
| -850                             | 5'                    | 2.6  | 0.0                    |
| -750                             | 5'                    | 2.7  | 0.0                    |
| -650                             | 5'                    | 2.7  | 0.0                    |
| -550                             | 5'                    | 2.6  | -0.1                   |
| -450                             | 5'                    | 2.5  | 0.0                    |
| -350                             | 5'                    | 2.4  | -0.1                   |
| -250                             | 5'                    | 2.4  | 0.1                    |
| -150                             | 5'                    | 2.8  | -0.1                   |
| -50                              | 5'                    | 2.8  | -0.6                   |
| 50                               | 5'                    | 2.7  | -0.5                   |
| 150                              | 5'                    | 2.6  | 0.3                    |
| 250                              | 5'                    | 2.6  | -0.1                   |
| 350                              | 5'                    | 3.1  | -0.1                   |
| 450                              | 5'                    | 2.8  | 0.0                    |
| 550                              | 5'                    | 2.8  | -0.1                   |
| 650                              | 5'                    | 3.0  | 0.0                    |
| 750                              | 5'                    | 2.7  | -0.1                   |
| 850                              | 5'                    | 2.7  | -0.1                   |
| 950                              | 5'                    | 1.9  | -0.2                   |
| -950                             | 3'                    | 1.8  | -0.1                   |
| -850                             | 3'                    | 2.6  | -0.1                   |
| -750                             | 3'                    | 2.7  | 0.0                    |
| -650                             | 3'                    | 2.7  | 0.0                    |
| -550                             | 3'                    | 2.7  | 0.0                    |
| -450                             | 3'                    | 2.6  | -0.1                   |
| -350                             | 3'                    | 2.5  | -0.1                   |
| -250                             | 3'                    | 2.5  | 0.1                    |
| -150                             | 3'                    | 2.4  | 0.0                    |
| -50                              | 3'                    | 2.3  | -0.1                   |
| 50                               | 3'                    | 2.6  | 0.0                    |
| 150                              | 3'                    | 2.8  | -0.2                   |
| 250                              | 3'                    | 2.8  | 0.0                    |
| 350                              | 3'                    | 2.8  | 0.0                    |
| 450                              | 3'                    | 2.7  | 0.0                    |
| 550                              | 3'                    | 2.8  | -0.1                   |
| 650                              | 3'                    | 2.9  | 0.1                    |
| 750                              | 3'                    | 2.8  | 0.0                    |
| 850                              | 3'                    | 2.7  | 0.0                    |
| 950                              | 3'                    | 1.8  | 0.0                    |
| Nucleosome gDNA, bin size=250 bp |                       |      |                        |
| Central position of bin          | Gene end <sup>1</sup> | VIF  | Regression coefficient |
| -875                             | 5'                    | 1.2  | 0.0                    |
| -625                             | 5'                    | 1.3  | 0.0                    |
| -375                             | 5'                    | 1.3  | 0.1                    |
| -125                             | 5'                    | 1.2  | -0.8                   |
| 125                              | 5'                    | 1.3  | -0.2                   |



| 375                         | 5'                    | 1.5 | -0.2                   |
|-----------------------------|-----------------------|-----|------------------------|
| 625                         | 5'                    | 1.6 | -0.1                   |
| 875                         | 5'                    | 1.4 | -0.4                   |
| -875                        | 3'                    | 1.4 | -0.3                   |
| -625                        | 3'                    | 1.5 | 0.0                    |
| -375                        | 3'                    | 1.4 | 0.0                    |
| -125                        | 3'                    | 1.3 | 0.0                    |
| 125                         | 3'                    | 1.3 | -0.3                   |
| 375                         | 3'                    | 1.4 | 0.0                    |
| 625                         | 3'                    | 1.4 | 0.0                    |
| 875                         | 3'                    | 1.2 | 0.1                    |
| Naked gDNA, bin size=100 bp |                       |     |                        |
| Central position of bin     | Gene end <sup>1</sup> | VIF | Regression coefficient |
| -950                        | 5'                    | 1.2 | 0.0                    |
| -850                        | 5'                    | 1.5 | 0.0                    |
| -750                        | 5'                    | 1.6 | 0.0                    |
| -650                        | 5'                    | 1.6 | 0.0                    |
| -550                        | 5'                    | 1.6 | 0.0                    |
| -450                        | 5'                    | 1.6 | 0.0                    |
| -350                        | 5'                    | 1.6 | 0.0                    |
| -250                        | 5'                    | 1.5 | 0.0                    |
| -150                        | 5'                    | 1.6 | 0.0                    |
| -50                         | 5'                    | 1.6 | -0.1                   |
| 50                          | 5'                    | 1.6 | 0.0                    |
| 150                         | 5'                    | 1.7 | 0.0                    |
| 250                         | 5'                    | 1.7 | 0.0                    |
| 350                         | 5'                    | 1.7 | 0.0                    |
| 450                         | 5'                    | 1.7 | 0.0                    |
| 550                         | 5'                    | 1.7 | 0.0                    |
| 650                         | 5'                    | 1.7 | 0.1                    |
| 750                         | 5'                    | 1.6 | 0.0                    |
| 850                         | 5'                    | 1.6 | 0.0                    |
| 950                         | 5'                    | 1.3 | 0.0                    |
| -950                        | 3'                    | 1.3 | 0.0                    |
| -850                        | 3'                    | 1.6 | 0.0                    |
| -750                        | 3'                    | 1.6 | 0.0                    |
| -650                        | 3'                    | 1.6 | 0.0                    |
| -550                        | 3'                    | 1.6 | 0.0                    |
| -450                        | 3'                    | 1.6 | 0.0                    |
| -350                        | 3'                    | 1.6 | 0.0                    |
| -250                        | 3'                    | 1.6 | 0.1                    |
| -150                        | 3'                    | 1.6 | 0.0                    |
| -50                         | 3'                    | 1.5 | -0.1                   |
| 50                          | 3'                    | 1.5 | 0.1                    |
| 150                         | 3'                    | 1.6 | 0.0                    |
| 250                         | 3'                    | 1.6 | 0.0                    |
| 350                         | 3'                    | 1.6 | 0.0                    |
| 450                         | 3'                    | 1.6 | 0.0                    |
| 550                         | 3'                    | 1.6 | 0.0                    |
| 650                         | 3'                    | 1.6 | 0.0                    |
| 750                         | 3'                    | 1.6 | 0.0                    |
| 850                         | 3'                    | 1.5 | 0.0                    |
| 950                         | 3'                    | 1.2 | 0.0                    |

1. The positions of the 5' and 3' bins are relative to the transcription start sites and the transcription termination site.

***Supplemental Table S7. Parameter combinations of the support vector machine method for predicting gene expression.***

| Parameter | Description                                                                                                       | Values                                                |
|-----------|-------------------------------------------------------------------------------------------------------------------|-------------------------------------------------------|
| C         | Soft margin of the SVM                                                                                            | $(2^{-5}, 2^{-3}, \dots, 1, 2^1, 2^3, \dots, 2^{15})$ |
| Gamma     | The parameter of the RBF kernel                                                                                   | $(2^{-15}, 2^{-13}, \dots, 1, 2^1, 2^3)$              |
| M         | Maximum class distribution spread as implemented in <code>weka.filters.supervised.instance.SpreadSubsample</code> | (0.2, 0.4, 0.8, 1, 2, 4, 8, 10)                       |

**Supplemental Table S8. The adjusted p-values from bootstrap analyses that tested whether the in vitro binding affinity of a given 6-mer to TFs (Weirauch et al., 2014)**

| Type | Motif  | AT hook | B3    | C2H2 ZF | CG-1  | CSD   | CxC   | Dof   | E2F   | EIN3  | ERF   | GATA  | GRAS  | Homeodomain | LOB   | MADF  | Myb/SANT | NAC/NAM | RAV   | SBP   | Sox   | Storekeeper | TCP   | WRC   | WRKY  | bHLH  | bZIP  |
|------|--------|---------|-------|---------|-------|-------|-------|-------|-------|-------|-------|-------|-------|-------------|-------|-------|----------|---------|-------|-------|-------|-------------|-------|-------|-------|-------|-------|
| I    | GGGCCG | 0.925   | 0.946 | 0.874   | 0.499 | 0.935 | 0.568 | 0.958 | 0.978 | 0.788 | 0.008 | 0.246 | 0.974 | 0.781       | 0.121 | 0.972 | 0.279    | 0.807   | 0.946 | 0.154 | 0.960 | 0.007       | 0.016 | 0.902 | 0.584 | 0.254 | 0.691 |
| I    | GGGCC  | 0.973   | 0.825 | 0.649   | 0.145 | 0.966 | 0.941 | 0.760 | 0.967 | 0.755 | 0.037 | 0.446 | 0.957 | 0.855       | 0.128 | 0.887 | 0.050    | 0.954   | 0.968 | 0.775 | 0.947 | 0.001       | 0.000 | 0.952 | 0.522 | 0.280 | 0.729 |
| I    | GGGCCT | 0.936   | 0.966 | 0.785   | 0.549 | 0.959 | 0.691 | 0.520 | 0.976 | 0.956 | 0.141 | 0.811 | 0.962 | 0.816       | 0.826 | 0.964 | 0.119    | 0.961   | 0.951 | 0.867 | 0.862 | 0.026       | 0.030 | 0.815 | 0.690 | 0.218 | 0.856 |
| I    | TGGGCC | 0.873   | 0.833 | 0.490   | 0.604 | 0.848 | 0.828 | 0.774 | 0.938 | 0.852 | 0.024 | 0.609 | 0.964 | 0.663       | 0.218 | 0.720 | 0.240    | 0.864   | 0.442 | 0.289 | 0.820 | 0.015       | 0.000 | 0.611 | 0.449 | 0.116 | 0.282 |
| I    | GGCCCA | 0.942   | 0.935 | 0.360   | 0.141 | 0.935 | 0.743 | 0.662 | 0.949 | 0.937 | 0.015 | 0.500 | 0.940 | 0.828       | 0.236 | 0.840 | 0.615    | 0.903   | 0.620 | 0.606 | 0.789 | 0.010       | 0.002 | 0.910 | 0.572 | 0.151 | 0.394 |
| I    | CGGCC  | 0.959   | 0.961 | 0.823   | 0.238 | 0.978 | 0.574 | 0.893 | 0.966 | 0.846 | 0.007 | 0.280 | 0.903 | 0.481       | 0.051 | 0.946 | 0.287    | 0.887   | 0.913 | 0.102 | 0.953 | 0.009       | 0.008 | 0.941 | 0.085 | 0.233 | 0.379 |
| I    | AGGCC  | 0.955   | 0.978 | 0.766   | 0.455 | 0.958 | 0.859 | 0.873 | 0.986 | 0.956 | 0.069 | 0.884 | 0.971 | 0.813       | 0.892 | 0.985 | 0.532    | 0.978   | 0.976 | 0.957 | 0.878 | 0.023       | 0.017 | 0.823 | 0.737 | 0.555 | 0.916 |
| I    | GCCCAT | 0.527   | 0.736 | 0.710   | 0.358 | 0.834 | 0.564 | 0.373 | 0.812 | 0.740 | 0.028 | 0.229 | 0.804 | 0.194       | 0.178 | 0.573 | 0.235    | 0.684   | 0.565 | 0.614 | 0.565 | 0.055       | 0.021 | 0.884 | 0.508 | 0.024 | 0.485 |
| I    | GGGCTT | 0.828   | 0.755 | 0.332   | 0.628 | 0.819 | 0.369 | 0.628 | 0.963 | 0.875 | 0.305 | 0.476 | 0.869 | 0.744       | 0.285 | 0.371 | 0.018    | 0.711   | 0.881 | 0.577 | 0.707 | 0.179       | 0.505 | 0.953 | 0.592 | 0.214 | 0.342 |
| I    | AGCCCA | 0.773   | 0.664 | 0.181   | 0.587 | 0.856 | 0.636 | 0.600 | 0.891 | 0.866 | 0.037 | 0.614 | 0.740 | 0.286       | 0.688 | 0.677 | 0.413    | 0.792   | 0.760 | 0.753 | 0.763 | 0.071       | 0.089 | 0.639 | 0.622 | 0.208 | 0.336 |
| I    | TTGGGC | 0.645   | 0.606 | 0.571   | 0.651 | 0.668 | 0.168 | 0.411 | 0.487 | 0.422 | 0.042 | 0.254 | 0.335 | 0.225       | 0.505 | 0.315 | 0.114    | 0.597   | 0.579 | 0.434 | 0.785 | 0.022       | 0.047 | 0.835 | 0.346 | 0.159 | 0.391 |
| I    | GCCCAA | 0.612   | 0.548 | 0.428   | 0.684 | 0.730 | 0.241 | 0.149 | 0.653 | 0.589 | 0.019 | 0.457 | 0.349 | 0.139       | 0.323 | 0.665 | 0.115    | 0.479   | 0.623 | 0.434 | 0.671 | 0.042       | 0.053 | 0.897 | 0.426 | 0.236 | 0.314 |
| I    | TGGCCC | 0.901   | 0.812 | 0.558   | 0.521 | 0.896 | 0.699 | 0.743 | 0.925 | 0.825 | 0.036 | 0.426 | 0.838 | 0.605       | 0.648 | 0.752 | 0.321    | 0.641   | 0.444 | 0.362 | 0.747 | 0.017       | 0.001 | 0.731 | 0.605 | 0.049 | 0.176 |
| I    | TGGGCT | 0.544   | 0.553 | 0.122   | 0.733 | 0.856 | 0.462 | 0.202 | 0.762 | 0.446 | 0.033 | 0.083 | 0.838 | 0.014       | 0.938 | 0.315 | 0.246    | 0.259   | 0.485 | 0.749 | 0.434 | 0.086       | 0.050 | 0.682 | 0.361 | 0.114 | 0.047 |
| I    | GCCCAG | 0.917   | 0.877 | 0.272   | 0.673 | 0.896 | 0.635 | 0.597 | 0.801 | 0.863 | 0.009 | 0.229 | 0.909 | 0.587       | 0.729 | 0.677 | 0.236    | 0.662   | 0.508 | 0.269 | 0.864 | 0.045       | 0.023 | 0.172 | 0.591 | 0.230 | 0.297 |
| I    | AAGCC  | 0.924   | 0.923 | 0.410   | 0.677 | 0.923 | 0.282 | 0.449 | 0.940 | 0.967 | 0.224 | 0.893 | 0.957 | 0.793       | 0.620 | 0.861 | 0.152    | 0.911   | 0.927 | 0.875 | 0.830 | 0.165       | 0.388 | 0.872 | 0.302 | 0.204 | 0.726 |
| I    | GGCCCG | 0.960   | 0.931 | 0.622   | 0.210 | 0.895 | 0.647 | 0.881 | 0.972 | 0.767 | 0.020 | 0.130 | 0.840 | 0.778       | 0.065 | 0.973 | 0.395    | 0.894   | 0.894 | 0.370 | 0.851 | 0.005       | 0.008 | 0.868 | 0.273 | 0.063 | 0.419 |
| I    | ATGGGC | 0.578   | 0.807 | 0.638   | 0.651 | 0.865 | 0.574 | 0.696 | 0.765 | 0.563 | 0.020 | 0.414 | 0.750 | 0.527       | 0.381 | 0.657 | 0.402    | 0.621   | 0.403 | 0.626 | 0.688 | 0.033       | 0.044 | 0.938 | 0.510 | 0.122 | 0.328 |
| I    | GCCACG | 0.877   | 0.778 | 0.679   | 0.031 | 0.916 | 0.766 | 0.482 | 0.851 | 0.717 | 0.016 | 0.594 | 0.820 | 0.718       | 0.228 | 0.785 | 0.098    | 0.202   | 0.681 | 0.383 | 0.888 | 0.051       | 0.061 | 0.951 | 0.336 | 0.010 | 0.002 |
| I    | CTGGGC | 0.897   | 0.857 | 0.131   | 0.670 | 0.893 | 0.573 | 0.730 | 0.826 | 0.598 | 0.034 | 0.511 | 0.876 | 0.465       | 0.683 | 0.742 | 0.359    | 0.796   | 0.503 | 0.417 | 0.901 | 0.049       | 0.048 | 0.168 | 0.590 | 0.173 | 0.408 |
| I    | GCCCAC | 0.836   | 0.659 | 0.115   | 0.139 | 0.939 | 0.598 | 0.357 | 0.827 | 0.612 | 0.005 | 0.151 | 0.437 | 0.042       | 0.625 | 0.532 | 0.162    | 0.492   | 0.300 | 0.302 | 0.786 | 0.050       | 0.003 | 0.721 | 0.387 | 0.041 | 0.093 |
| I    | GGCCTG | 0.921   | 0.924 | 0.682   | 0.650 | 0.962 | 0.218 | 0.688 | 0.943 | 0.746 | 0.047 | 0.102 | 0.872 | 0.190       | 0.992 | 0.911 | 0.369    | 0.769   | 0.847 | 0.593 | 0.816 | 0.003       | 0.242 | 0.021 | 0.201 | 0.255 | 0.768 |
| I    | GTGGGC | 0.782   | 0.741 | 0.075   | 0.228 | 0.929 | 0.598 | 0.578 | 0.667 | 0.649 | 0.007 | 0.122 | 0.483 | 0.042       | 0.554 | 0.600 | 0.088    | 0.446   | 0.289 | 0.219 | 0.809 | 0.050       | 0.003 | 0.707 | 0.287 | 0.028 | 0.052 |
| I    | TAGGCC | 0.605   | 0.804 | 0.380   | 0.540 | 0.772 | 0.713 | 0.740 | 0.826 | 0.623 | 0.085 | 0.574 | 0.775 | 0.666       | 0.853 | 0.419 | 0.150    | 0.706   | 0.681 | 0.493 | 0.617 | 0.010       | 0.145 | 0.799 | 0.684 | 0.285 | 0.310 |
| I    | GGCCTT | 0.489   | 0.777 | 0.513   | 0.912 | 0.632 | 0.534 | 0.543 | 0.892 | 0.879 | 0.124 | 0.609 | 0.771 | 0.317       | 0.895 | 0.864 | 0.182    | 0.702   | 0.837 | 0.546 | 0.448 | 0.017       | 0.335 | 0.405 | 0.127 | 0.152 | 0.567 |
| I    | AAGGCC | 0.840   | 0.892 | 0.735   | 0.636 | 0.805 | 0.550 | 0.308 | 0.945 | 0.938 | 0.131 | 0.481 | 0.878 | 0.691       | 0.788 | 0.961 | 0.343    | 0.895   | 0.922 | 0.708 | 0.665 | 0.017       | 0.325 | 0.578 | 0.729 | 0.168 | 0.745 |
| I    | GGGCCA | 0.716   | 0.936 | 0.386   | 0.561 | 0.915 | 0.642 | 0.761 | 0.931 | 0.895 | 0.045 | 0.349 | 0.743 | 0.435       | 0.549 | 0.714 | 0.136    | 0.663   | 0.649 | 0.595 | 0.763 | 0.015       | 0.003 | 0.627 | 0.731 | 0.041 | 0.118 |
| I    | CACGTG | 0.482   | 0.371 | 0.465   | 0.013 | 0.761 | 0.363 | 0.343 | 0.627 | 0.073 | 0.118 | 0.281 | 0.226 | 0.097       | 0.290 | 0.350 | 0.054    | 0.152   | 0.528 | 0.207 | 0.118 | 0.107       | 0.052 | 0.727 | 0.173 | 0.000 | 0.000 |
| I    | GGGCTG | 0.828   | 0.867 | 0.429   | 0.665 | 0.862 | 0.489 | 0.426 | 0.936 | 0.665 | 0.038 | 0.406 | 0.816 | 0.526       | 0.758 | 0.731 | 0.059    | 0.784   | 0.821 | 0.470 | 0.734 | 0.094       | 0.082 | 0.590 | 0.166 | 0.152 | 0.194 |
| I    | AGCCCG | 0.841   | 0.839 | 0.335   | 0.426 | 0.859 | 0.697 | 0.643 | 0.656 | 0.467 | 0.048 | 0.360 | 0.688 | 0.597       | 0.031 | 0.769 | 0.384    | 0.777   | 0.856 | 0.492 | 0.799 | 0.058       | 0.218 | 0.813 | 0.585 | 0.111 | 0.519 |
| I    | GGCCTA | 0.787   | 0.771 | 0.564   | 0.492 | 0.810 | 0.745 | 0.505 | 0.841 | 0.896 | 0.063 | 0.564 | 0.627 | 0.745       | 0.543 | 0.714 | 0.020    | 0.810   | 0.812 | 0.545 | 0.660 | 0.008       | 0.360 | 0.707 | 0.495 | 0.330 | 0.562 |
| I    | AACCGG | 0.447   | 0.407 | 0.438   | 0.187 | 0.818 | 0.214 | 0.469 | 0.750 | 0.303 | 0.040 | 0.147 | 0.690 | 0.040       | 0.017 | 0.016 | 0.014    | 0.389   | 0.619 | 0.323 | 0.591 | 0.012       | 0.085 | 0.896 | 0.176 | 0.146 | 0.246 |
| I    | GCCCGT | 0.559   | 0.294 | 0.797   | 0.235 | 0.652 | 0.251 | 0.149 | 0.543 | 0.241 | 0.018 | 0.099 | 0.230 | 0.060       | 0.063 | 0.149 | 0.111    | 0.302   | 0.561 | 0.023 | 0.691 | 0.029       | 0.018 | 0.257 | 0.184 | 0.034 | 0.116 |
| I    | ACGTGG | 0.605   | 0.564 | 0.750   | 0.038 | 0.733 | 0.534 | 0.127 | 0.662 | 0.389 | 0.083 | 0.354 | 0.428 | 0.156       | 0.302 | 0.363 | 0.144    | 0.136   | 0.366 | 0.337 | 0.445 | 0.141       | 0.021 | 0.831 | 0.107 | 0.000 | 0.000 |
| I    | GGGCTC | 0.975   | 0.976 | 0.584   | 0.444 | 0.931 | 0.766 | 0.645 | 0.977 | 0.955 | 0.186 | 0.721 | 0.956 | 0.619       | 0.177 | 0.721 | 0.020    | 0.928   | 0.926 | 0.449 | 0.949 | 0.087       | 0.147 | 0.977 | 0.826 | 0.638 | 0.782 |
| I    | GGCCGA | 0.733   | 0.153 | 0.606   | 0.331 | 0.802 | 0.299 | 0.579 | 0.890 | 0.304 | 0.004 | 0.207 | 0.483 | 0.414       | 0.153 | 0.742 | 0.074    | 0.733   | 0.669 | 0.376 | 0.763 | 0.002       | 0.218 | 0.752 | 0.491 | 0.351 | 0.284 |
| I    | ACCGGG | 0.717   | 0.635 | 0.687   | 0.000 | 0.920 | 0.220 | 0.195 | 0.027 | 0.223 | 0.046 | 0.319 | 0.529 | 0.416       | 0.006 | 0.484 | 0.248    | 0.420   | 0.688 | 0.320 | 0.725 | 0.063       | 0.475 | 0.874 | 0.065 | 0.031 | 0.046 |
| I    | GGGCTA | 0.520   | 0.848 | 0.292   | 0.676 | 0.753 | 0.498 | 0.433 | 0.769 | 0.505 | 0.120 | 0.121 | 0.654 | 0.086       | 0.583 | 0.199 | 0.087    | 0.533   | 0.659 | 0.526 | 0.616 | 0.137       | 0.049 | 0.876 | 0.724 | 0.257 | 0.152 |
| I    | GTCGGG | 0.715   | 0.465 | 0.407   | 0.203 | 0.787 | 0.443 | 0.497 | 0.873 | 0.355 | 0.020 | 0.240 | 0.919 | 0.129       | 0.213 | 0.337 | 0.205    | 0.236   | 0.658 | 0.177 | 0.715 | 0.063       | 0.095 | 0.904 | 0.093 | 0.227 | 0.218 |
| I    | ACGGCC | 0.846   | 0.850 | 0.818   | 0.277 | 0.816 | 0.652 | 0.265 | 0.865 | 0.763 | 0.010 | 0.542 | 0.508 | 0.499       | 0.274 | 0.721 | 0.070    | 0.669   | 0.871 | 0.023 | 0.672 | 0.001       | 0.074 | 0.781 | 0.275 | 0.114 | 0.390 |
| I    | CGACGT | 0.490   | 0.436 | 0.702   | 0.021 | 0.554 | 0.420 | 0.246 | 0.384 | 0.269 | 0.005 | 0.171 | 0.352 | 0.008       | 0.544 | 0.384 | 0.120    | 0.052   | 0.419 | 0.033 | 0.323 | 0.008       | 0.528 | 0.515 | 0.071 | 0.045 | 0.012 |

|    |        |       |       |       |       |       |       |       |       |       |       |       |       |       |       |       |       |       |       |       |       |       |       |       |       |       |       |
|----|--------|-------|-------|-------|-------|-------|-------|-------|-------|-------|-------|-------|-------|-------|-------|-------|-------|-------|-------|-------|-------|-------|-------|-------|-------|-------|-------|
| I  | GAACCG | 0.767 | 0.569 | 0.309 | 0.180 | 0.813 | 0.229 | 0.612 | 0.565 | 0.060 | 0.014 | 0.181 | 0.793 | 0.030 | 0.026 | 0.098 | 0.028 | 0.381 | 0.506 | 0.088 | 0.661 | 0.075 | 0.216 | 0.145 | 0.149 | 0.152 | 0.293 |
| I  | ACCCGA | 0.674 | 0.203 | 0.395 | 0.144 | 0.731 | 0.342 | 0.308 | 0.591 | 0.202 | 0.214 | 0.148 | 0.289 | 0.119 | 0.122 | 0.017 | 0.017 | 0.221 | 0.602 | 0.288 | 0.699 | 0.074 | 0.068 | 0.809 | 0.134 | 0.333 | 0.210 |
| I  | ACCGGA | 0.510 | 0.442 | 0.477 | 0.051 | 0.795 | 0.615 | 0.591 | 0.756 | 0.382 | 0.068 | 0.140 | 0.719 | 0.103 | 0.006 | 0.064 | 0.019 | 0.096 | 0.484 | 0.070 | 0.619 | 0.001 | 0.134 | 0.890 | 0.052 | 0.405 | 0.340 |
| I  | ACCGGG | 0.740 | 0.460 | 0.649 | 0.107 | 0.983 | 0.501 | 0.755 | 0.795 | 0.251 | 0.151 | 0.531 | 0.828 | 0.238 | 0.010 | 0.053 | 0.086 | 0.131 | 0.759 | 0.382 | 0.810 | 0.029 | 0.032 | 0.956 | 0.104 | 0.121 | 0.305 |
| I  | CGGAT  | 0.332 | 0.597 | 0.368 | 0.045 | 0.785 | 0.377 | 0.428 | 0.695 | 0.222 | 0.141 | 0.022 | 0.592 | 0.282 | 0.012 | 0.415 | 0.004 | 0.326 | 0.416 | 0.089 | 0.401 | 0.019 | 0.056 | 0.845 | 0.131 | 0.091 | 0.162 |
| I  | AGGCT  | 0.897 | 0.851 | 0.531 | 0.656 | 0.770 | 0.517 | 0.638 | 0.917 | 0.819 | 0.117 | 0.416 | 0.753 | 0.669 | 0.988 | 0.850 | 0.301 | 0.901 | 0.834 | 0.681 | 0.505 | 0.020 | 0.304 | 0.090 | 0.774 | 0.428 | 0.757 |
| I  | AGCCGT | 0.689 | 0.735 | 0.484 | 0.336 | 0.745 | 0.567 | 0.525 | 0.841 | 0.733 | 0.008 | 0.609 | 0.602 | 0.130 | 0.092 | 0.682 | 0.160 | 0.042 | 0.629 | 0.026 | 0.495 | 0.036 | 0.250 | 0.550 | 0.198 | 0.207 | 0.422 |
| I  | AACGGC | 0.597 | 0.370 | 0.552 | 0.422 | 0.587 | 0.290 | 0.035 | 0.347 | 0.563 | 0.009 | 0.514 | 0.276 | 0.339 | 0.057 | 0.200 | 0.003 | 0.221 | 0.383 | 0.110 | 0.435 | 0.032 | 0.145 | 0.690 | 0.146 | 0.085 | 0.219 |
| I  | ATTGGG | 0.199 | 0.365 | 0.679 | 0.611 | 0.545 | 0.121 | 0.275 | 0.584 | 0.093 | 0.122 | 0.125 | 0.074 | 0.060 | 0.170 | 0.312 | 0.090 | 0.288 | 0.402 | 0.342 | 0.456 | 0.086 | 0.036 | 0.732 | 0.174 | 0.135 | 0.048 |
| I  | ACTGGG | 0.669 | 0.569 | 0.036 | 0.524 | 0.875 | 0.411 | 0.394 | 0.862 | 0.327 | 0.243 | 0.254 | 0.894 | 0.268 | 0.928 | 0.119 | 0.412 | 0.437 | 0.375 | 0.549 | 0.702 | 0.182 | 0.034 | 0.344 | 0.218 | 0.280 | 0.179 |
| I  | CGTGTC | 0.572 | 0.023 | 0.373 | 0.004 | 0.457 | 0.263 | 0.221 | 0.398 | 0.196 | 0.087 | 0.190 | 0.450 | 0.028 | 0.171 | 0.293 | 0.118 | 0.010 | 0.414 | 0.134 | 0.311 | 0.061 | 0.200 | 0.511 | 0.130 | 0.002 | 0.001 |
| I  | AACCGA | 0.324 | 0.068 | 0.178 | 0.054 | 0.418 | 0.129 | 0.261 | 0.213 | 0.322 | 0.007 | 0.212 | 0.224 | 0.038 | 0.100 | 0.044 | 0.005 | 0.197 | 0.224 | 0.387 | 0.490 | 0.047 | 0.103 | 0.244 | 0.203 | 0.144 | 0.195 |
| I  | AGCCGG | 0.824 | 0.732 | 0.572 | 0.516 | 0.924 | 0.696 | 0.561 | 0.914 | 0.739 | 0.008 | 0.616 | 0.823 | 0.534 | 0.062 | 0.807 | 0.298 | 0.716 | 0.902 | 0.446 | 0.819 | 0.016 | 0.290 | 0.890 | 0.205 | 0.154 | 0.546 |
| I  | AATGGG | 0.178 | 0.395 | 0.693 | 0.732 | 0.707 | 0.228 | 0.556 | 0.703 | 0.086 | 0.072 | 0.333 | 0.528 | 0.241 | 0.378 | 0.695 | 0.263 | 0.326 | 0.385 | 0.492 | 0.541 | 0.147 | 0.030 | 0.754 | 0.190 | 0.089 | 0.169 |
| I  | CCCAAT | 0.281 | 0.413 | 0.387 | 0.514 | 0.552 | 0.298 | 0.357 | 0.390 | 0.118 | 0.026 | 0.099 | 0.198 | 0.023 | 0.259 | 0.251 | 0.064 | 0.296 | 0.398 | 0.331 | 0.398 | 0.095 | 0.040 | 0.670 | 0.214 | 0.032 | 0.050 |
| I  | CCGAAA | 0.121 | 0.250 | 0.369 | 0.211 | 0.321 | 0.100 | 0.051 | 0.483 | 0.168 | 0.023 | 0.301 | 0.028 | 0.366 | 0.099 | 0.583 | 0.039 | 0.448 | 0.445 | 0.415 | 0.534 | 0.134 | 0.378 | 0.730 | 0.347 | 0.104 | 0.213 |
| I  | CGGTGG | 0.405 | 0.367 | 0.383 | 0.164 | 0.867 | 0.505 | 0.233 | 0.717 | 0.250 | 0.002 | 0.208 | 0.672 | 0.159 | 0.059 | 0.136 | 0.052 | 0.139 | 0.412 | 0.052 | 0.757 | 0.034 | 0.016 | 0.899 | 0.095 | 0.020 | 0.020 |
| I  | CAACCG | 0.717 | 0.233 | 0.304 | 0.212 | 0.919 | 0.728 | 0.874 | 0.766 | 0.328 | 0.001 | 0.241 | 0.369 | 0.148 | 0.068 | 0.155 | 0.028 | 0.253 | 0.728 | 0.083 | 0.523 | 0.041 | 0.031 | 0.605 | 0.106 | 0.028 | 0.031 |
| II | CGCGCT | 0.356 | 0.266 | 0.187 | 0.008 | 0.698 | 0.604 | 0.192 | 0.003 | 0.347 | 0.027 | 0.188 | 0.311 | 0.199 | 0.012 | 0.139 | 0.008 | 0.343 | 0.594 | 0.196 | 0.491 | 0.080 | 0.319 | 0.701 | 0.063 | 0.039 | 0.057 |
| II | GCCGCG | 0.889 | 0.871 | 0.400 | 0.212 | 0.977 | 0.772 | 0.546 | 0.369 | 0.381 | 0.002 | 0.551 | 0.689 | 0.461 | 0.028 | 0.947 | 0.250 | 0.913 | 0.741 | 0.386 | 0.873 | 0.007 | 0.047 | 0.816 | 0.458 | 0.064 | 0.404 |
| II | ACGGGC | 0.598 | 0.665 | 0.678 | 0.321 | 0.843 | 0.629 | 0.417 | 0.853 | 0.498 | 0.032 | 0.479 | 0.670 | 0.296 | 0.072 | 0.456 | 0.146 | 0.566 | 0.694 | 0.039 | 0.652 | 0.032 | 0.108 | 0.272 | 0.163 | 0.029 | 0.099 |
| II | CGCGGT | 0.439 | 0.119 | 0.413 | 0.002 | 0.454 | 0.264 | 0.055 | 0.002 | 0.122 | 0.018 | 0.228 | 0.478 | 0.164 | 0.017 | 0.117 | 0.035 | 0.245 | 0.424 | 0.041 | 0.505 | 0.049 | 0.063 | 0.658 | 0.067 | 0.005 | 0.011 |
| II | AGCGCG | 0.397 | 0.376 | 0.222 | 0.012 | 0.503 | 0.575 | 0.286 | 0.004 | 0.414 | 0.028 | 0.129 | 0.391 | 0.163 | 0.011 | 0.184 | 0.015 | 0.338 | 0.629 | 0.160 | 0.673 | 0.108 | 0.329 | 0.218 | 0.046 | 0.037 | 0.063 |
| II | CGGGCC | 0.952 | 0.962 | 0.504 | 0.292 | 0.984 | 0.900 | 0.853 | 0.975 | 0.273 | 0.018 | 0.228 | 0.957 | 0.789 | 0.037 | 0.812 | 0.430 | 0.777 | 0.928 | 0.322 | 0.956 | 0.006 | 0.005 | 0.850 | 0.601 | 0.015 | 0.344 |
| II | ACGCGC | 0.559 | 0.269 | 0.537 | 0.002 | 0.712 | 0.650 | 0.196 | 0.004 | 0.018 | 0.136 | 0.437 | 0.166 | 0.020 | 0.330 | 0.030 | 0.236 | 0.502 | 0.097 | 0.587 | 0.043 | 0.128 | 0.551 | 0.128 | 0.007 | 0.010 |       |
| II | CGGTG  | 0.522 | 0.569 | 0.481 | 0.000 | 0.659 | 0.324 | 0.292 | 0.115 | 0.069 | 0.028 | 0.204 | 0.441 | 0.146 | 0.044 | 0.384 | 0.054 | 0.056 | 0.591 | 0.284 | 0.383 | 0.057 | 0.407 | 0.774 | 0.123 | 0.000 | 0.015 |
| II | CAGGCC | 0.926 | 0.863 | 0.562 | 0.547 | 0.964 | 0.432 | 0.247 | 0.967 | 0.783 | 0.049 | 0.370 | 0.943 | 0.799 | 0.924 | 0.879 | 0.178 | 0.922 | 0.740 | 0.577 | 0.808 | 0.004 | 0.165 | 0.165 | 0.666 | 0.535 | 0.731 |
| II | CGGGCC | 0.837 | 0.792 | 0.718 | 0.812 | 0.845 | 0.726 | 0.757 | 0.945 | 0.489 | 0.000 | 0.312 | 0.893 | 0.357 | 0.053 | 0.728 | 0.051 | 0.689 | 0.434 | 0.137 | 0.885 | 0.001 | 0.033 | 0.882 | 0.322 | 0.029 | 0.142 |
| II | CGGGCT | 0.778 | 0.754 | 0.300 | 0.148 | 0.778 | 0.518 | 0.390 | 0.696 | 0.614 | 0.053 | 0.375 | 0.780 | 0.239 | 0.071 | 0.213 | 0.297 | 0.585 | 0.730 | 0.113 | 0.748 | 0.053 | 0.111 | 0.842 | 0.299 | 0.155 | 0.357 |
| II | GCTCGG | 0.655 | 0.706 | 0.819 | 0.052 | 0.777 | 0.550 | 0.248 | 0.797 | 0.395 | 0.020 | 0.242 | 0.774 | 0.065 | 0.070 | 0.127 | 0.166 | 0.164 | 0.711 | 0.022 | 0.734 | 0.008 | 0.272 | 0.782 | 0.158 | 0.220 | 0.193 |
| II | TCGGCC | 0.800 | 0.863 | 0.601 | 0.219 | 0.821 | 0.490 | 0.673 | 0.881 | 0.441 | 0.011 | 0.147 | 0.870 | 0.312 | 0.142 | 0.894 | 0.084 | 0.605 | 0.667 | 0.352 | 0.807 | 0.002 | 0.053 | 0.902 | 0.380 | 0.216 | 0.352 |
| II | GCGGCG | 0.698 | 0.652 | 0.391 | 0.084 | 0.899 | 0.734 | 0.566 | 0.134 | 0.260 | 0.000 | 0.277 | 0.514 | 0.253 | 0.005 | 0.503 | 0.097 | 0.706 | 0.524 | 0.434 | 0.672 | 0.003 | 0.302 | 0.723 | 0.045 | 0.031 | 0.309 |
| II | CGCGTC | 0.480 | 0.198 | 0.849 | 0.001 | 0.742 | 0.607 | 0.286 | 0.153 | 0.430 | 0.028 | 0.145 | 0.449 | 0.032 | 0.055 | 0.189 | 0.182 | 0.116 | 0.477 | 0.104 | 0.367 | 0.018 | 0.359 | 0.824 | 0.063 | 0.048 | 0.012 |
| II | GGCCGG | 0.811 | 0.492 | 0.774 | 0.622 | 0.881 | 0.428 | 0.463 | 0.957 | 0.183 | 0.002 | 0.166 | 0.878 | 0.433 | 0.023 | 0.859 | 0.050 | 0.575 | 0.618 | 0.051 | 0.835 | 0.000 | 0.080 | 0.670 | 0.380 | 0.039 | 0.317 |
| II | CGCGCC | 0.774 | 0.656 | 0.806 | 0.014 | 0.958 | 0.854 | 0.625 | 0.001 | 0.073 | 0.008 | 0.195 | 0.630 | 0.494 | 0.015 | 0.489 | 0.226 | 0.534 | 0.660 | 0.363 | 0.839 | 0.027 | 0.165 | 0.869 | 0.419 | 0.008 | 0.096 |
| II | GCGGGG | 0.287 | 0.773 | 0.515 | 0.072 | 0.989 | 0.764 | 0.340 | 0.765 | 0.084 | 0.079 | 0.048 | 0.865 | 0.094 | 0.012 | 0.462 | 0.090 | 0.342 | 0.787 | 0.178 | 0.802 | 0.090 | 0.007 | 0.967 | 0.389 | 0.003 | 0.143 |
| II | CCGGGT | 0.884 | 0.800 | 0.728 | 0.062 | 0.939 | 0.384 | 0.433 | 0.753 | 0.217 | 0.247 | 0.326 | 0.629 | 0.072 | 0.025 | 0.025 | 0.046 | 0.215 | 0.739 | 0.107 | 0.698 | 0.010 | 0.039 | 0.891 | 0.028 | 0.068 | 0.091 |
| II | GGCGCG | 0.693 | 0.809 | 0.683 | 0.021 | 0.954 | 0.404 | 0.548 | 0.001 | 0.151 | 0.010 | 0.136 | 0.430 | 0.290 | 0.007 | 0.864 | 0.274 | 0.673 | 0.741 | 0.264 | 0.822 | 0.020 | 0.299 | 0.116 | 0.119 | 0.003 | 0.136 |
| II | GCGGCC | 0.872 | 0.880 | 0.550 | 0.259 | 0.949 | 0.541 | 0.701 | 0.071 | 0.395 | 0.000 | 0.163 | 0.526 | 0.400 | 0.020 | 0.458 | 0.225 | 0.783 | 0.688 | 0.217 | 0.873 | 0.009 | 0.115 | 0.314 | 0.060 | 0.004 | 0.156 |
| II | CCCGGC | 0.859 | 0.620 | 0.690 | 0.427 | 0.961 | 0.715 | 0.878 | 0.938 | 0.355 | 0.045 | 0.620 | 0.947 | 0.422 | 0.009 | 0.807 | 0.141 | 0.686 | 0.891 | 0.314 | 0.960 | 0.004 | 0.128 | 0.875 | 0.364 | 0.255 | 0.619 |
| II | CGGGTC | 0.852 | 0.711 | 0.643 | 0.090 | 0.923 | 0.394 | 0.784 | 0.771 | 0.808 | 0.082 | 0.226 | 0.733 | 0.035 | 0.051 | 0.121 | 0.392 | 0.019 | 0.702 | 0.353 | 0.948 | 0.042 | 0.027 | 0.949 | 0.012 | 0.052 | 0.494 |
| II | CACGCG | 0.611 | 0.415 | 0.543 | 0.001 | 0.776 | 0.306 | 0.405 | 0.064 | 0.026 | 0.018 | 0.151 | 0.256 | 0.181 | 0.047 | 0.217 | 0.036 | 0.024 | 0.377 | 0.280 | 0.583 | 0.036 | 0.120 | 0.742 | 0.187 | 0.000 | 0.017 |
| II | CGCGCG | 0.239 | 0.180 | 0.622 | 0.009 | 0.820 | 0.284 | 0.118 | 0.060 | 0.011 | 0.007 | 0.037 | 0.272 | 0.078 | 0.001 | 0.060 | 0.008 | 0.054 | 0.375 | 0.081 | 0.313 | 0.011 | 0.036 | 0.153 | 0.031 | 0.001 | 0.009 |
| II | CGTGCC | 0.846 | 0.853 | 0.551 | 0.045 | 0.867 | 0.391 | 0.451 | 0.775 | 0.576 | 0.032 | 0.496 | 0.801 | 0.533 | 0.273 | 0.575 | 0.206 | 0.419 | 0.349 | 0.295 | 0.842 | 0.048 | 0.090 | 0.761 | 0.334 | 0.005 | 0.000 |
| II | GACCCG | 0.879 | 0.487 | 0.604 | 0.147 | 0.886 | 0.342 | 0.570 | 0.610 |       |       |       |       |       |       |       |       |       |       |       |       |       |       |       |       |       |       |

|    |        |       |       |       |       |       |       |       |       |       |       |       |       |       |       |       |       |       |       |       |       |       |       |       |       |       |       |
|----|--------|-------|-------|-------|-------|-------|-------|-------|-------|-------|-------|-------|-------|-------|-------|-------|-------|-------|-------|-------|-------|-------|-------|-------|-------|-------|-------|
| II | CGCCAC | 0.783 | 0.399 | 0.160 | 0.062 | 0.890 | 0.574 | 0.320 | 0.029 | 0.235 | 0.004 | 0.424 | 0.620 | 0.152 | 0.097 | 0.432 | 0.081 | 0.220 | 0.188 | 0.311 | 0.778 | 0.075 | 0.071 | 0.875 | 0.297 | 0.029 | 0.006 |
| II | ACGGCG | 0.659 | 0.786 | 0.684 | 0.046 | 0.875 | 0.309 | 0.269 | 0.387 | 0.274 | 0.002 | 0.332 | 0.321 | 0.223 | 0.023 | 0.649 | 0.217 | 0.315 | 0.693 | 0.039 | 0.592 | 0.014 | 0.547 | 0.785 | 0.083 | 0.101 | 0.145 |
| II | TCGGGC | 0.578 | 0.726 | 0.412 | 0.204 | 0.888 | 0.431 | 0.766 | 0.869 | 0.440 | 0.035 | 0.097 | 0.922 | 0.159 | 0.337 | 0.892 | 0.072 | 0.409 | 0.720 | 0.427 | 0.466 | 0.020 | 0.077 | 0.925 | 0.141 | 0.118 | 0.376 |
| II | CCCGGT | 0.806 | 0.876 | 0.436 | 0.076 | 0.981 | 0.741 | 0.815 | 0.881 | 0.303 | 0.106 | 0.303 | 0.922 | 0.128 | 0.026 | 0.024 | 0.099 | 0.094 | 0.700 | 0.073 | 0.875 | 0.048 | 0.033 | 0.934 | 0.044 | 0.053 | 0.243 |
| II | ACGCCG | 0.622 | 0.204 | 0.624 | 0.027 | 0.924 | 0.264 | 0.176 | 0.530 | 0.204 | 0.003 | 0.336 | 0.161 | 0.180 | 0.044 | 0.571 | 0.186 | 0.402 | 0.675 | 0.053 | 0.523 | 0.017 | 0.497 | 0.812 | 0.078 | 0.051 | 0.188 |
| II | TCGGCG | 0.401 | 0.468 | 0.387 | 0.085 | 0.727 | 0.243 | 0.229 | 0.006 | 0.262 | 0.027 | 0.046 | 0.570 | 0.270 | 0.010 | 0.573 | 0.027 | 0.179 | 0.375 | 0.174 | 0.346 | 0.116 | 0.143 | 0.304 | 0.097 | 0.018 | 0.086 |
| II | GGCCGT | 0.506 | 0.784 | 0.792 | 0.397 | 0.806 | 0.618 | 0.264 | 0.902 | 0.556 | 0.007 | 0.202 | 0.613 | 0.212 | 0.060 | 0.733 | 0.078 | 0.514 | 0.774 | 0.019 | 0.641 | 0.000 | 0.576 | 0.732 | 0.194 | 0.056 | 0.452 |
| II | CCACGC | 0.887 | 0.760 | 0.455 | 0.013 | 0.905 | 0.438 | 0.388 | 0.779 | 0.295 | 0.044 | 0.405 | 0.889 | 0.307 | 0.085 | 0.182 | 0.054 | 0.061 | 0.664 | 0.129 | 0.878 | 0.177 | 0.017 | 0.740 | 0.141 | 0.005 | 0.011 |
| II | GCGTCG | 0.655 | 0.577 | 0.641 | 0.024 | 0.643 | 0.648 | 0.606 | 0.431 | 0.279 | 0.020 | 0.115 | 0.492 | 0.095 | 0.131 | 0.384 | 0.300 | 0.390 | 0.411 | 0.123 | 0.409 | 0.046 | 0.240 | 0.737 | 0.096 | 0.150 | 0.129 |
| II | CGGCTG | 0.751 | 0.608 | 0.335 | 0.262 | 0.893 | 0.672 | 0.399 | 0.700 | 0.517 | 0.002 | 0.584 | 0.421 | 0.266 | 0.126 | 0.691 | 0.195 | 0.698 | 0.484 | 0.296 | 0.732 | 0.023 | 0.474 | 0.242 | 0.040 | 0.035 | 0.127 |
| II | CGCCGC | 0.845 | 0.857 | 0.390 | 0.071 | 0.941 | 0.444 | 0.634 | 0.578 | 0.176 | 0.000 | 0.279 | 0.454 | 0.119 | 0.008 | 0.455 | 0.358 | 0.666 | 0.765 | 0.206 | 0.903 | 0.003 | 0.179 | 0.784 | 0.079 | 0.026 | 0.330 |
| II | CCTGGC | 0.922 | 0.805 | 0.569 | 0.515 | 0.930 | 0.294 | 0.674 | 0.901 | 0.799 | 0.055 | 0.316 | 0.959 | 0.681 | 0.942 | 0.408 | 0.207 | 0.565 | 0.300 | 0.460 | 0.903 | 0.041 | 0.389 | 0.065 | 0.398 | 0.057 | 0.012 |
| II | GCCGTT | 0.482 | 0.390 | 0.456 | 0.263 | 0.598 | 0.247 | 0.022 | 0.418 | 0.495 | 0.005 | 0.357 | 0.464 | 0.275 | 0.095 | 0.369 | 0.002 | 0.373 | 0.458 | 0.188 | 0.199 | 0.025 | 0.139 | 0.802 | 0.171 | 0.110 | 0.292 |
| II | GGCGGG | 0.394 | 0.484 | 0.575 | 0.499 | 0.946 | 0.724 | 0.195 | 0.004 | 0.213 | 0.007 | 0.504 | 0.633 | 0.111 | 0.033 | 0.547 | 0.217 | 0.323 | 0.852 | 0.137 | 0.879 | 0.007 | 0.032 | 0.887 | 0.352 | 0.139 | 0.315 |
| II | CGCGGG | 0.610 | 0.613 | 0.475 | 0.188 | 0.966 | 0.812 | 0.149 | 0.850 | 0.054 | 0.001 | 0.310 | 0.515 | 0.058 | 0.002 | 0.710 | 0.191 | 0.546 | 0.920 | 0.069 | 0.814 | 0.000 | 0.230 | 0.957 | 0.029 | 0.099 | 0.217 |
| II | CGTCGG | 0.648 | 0.813 | 0.716 | 0.043 | 0.843 | 0.182 | 0.595 | 0.820 | 0.116 | 0.002 | 0.249 | 0.723 | 0.072 | 0.142 | 0.170 | 0.169 | 0.406 | 0.261 | 0.130 | 0.698 | 0.006 | 0.438 | 0.956 | 0.113 | 0.119 | 0.065 |
| II | CGCGAC | 0.552 | 0.016 | 0.508 | 0.026 | 0.811 | 0.479 | 0.632 | 0.241 | 0.266 | 0.050 | 0.141 | 0.332 | 0.040 | 0.059 | 0.608 | 0.172 | 0.039 | 0.122 | 0.245 | 0.631 | 0.028 | 0.483 | 0.507 | 0.034 | 0.021 | 0.077 |
| II | CGACGT | 0.518 | 0.522 | 0.684 | 0.037 | 0.648 | 0.605 | 0.210 | 0.529 | 0.266 | 0.041 | 0.339 | 0.612 | 0.154 | 0.282 | 0.109 | 0.076 | 0.133 | 0.350 | 0.178 | 0.490 | 0.099 | 0.005 | 0.853 | 0.144 | 0.001 | 0.000 |
| II | CGACGC | 0.875 | 0.707 | 0.616 | 0.027 | 0.774 | 0.590 | 0.635 | 0.533 | 0.454 | 0.019 | 0.237 | 0.476 | 0.143 | 0.104 | 0.524 | 0.338 | 0.287 | 0.575 | 0.073 | 0.747 | 0.058 | 0.401 | 0.416 | 0.085 | 0.094 | 0.111 |
| II | CCGGTT | 0.703 | 0.671 | 0.288 | 0.132 | 0.863 | 0.191 | 0.596 | 0.795 | 0.274 | 0.022 | 0.552 | 0.654 | 0.017 | 0.017 | 0.013 | 0.009 | 0.411 | 0.708 | 0.471 | 0.404 | 0.008 | 0.074 | 0.633 | 0.121 | 0.089 | 0.176 |
| II | GGTCCG | 0.683 | 0.843 | 0.843 | 0.314 | 0.936 | 0.644 | 0.784 | 0.923 | 0.458 | 0.177 | 0.213 | 0.902 | 0.092 | 0.827 | 0.338 | 0.105 | 0.095 | 0.826 | 0.263 | 0.907 | 0.090 | 0.208 | 0.973 | 0.041 | 0.242 | 0.390 |
| II | GTCCGG | 0.791 | 0.845 | 0.414 | 0.063 | 0.934 | 0.560 | 0.786 | 0.922 | 0.412 | 0.285 | 0.259 | 0.811 | 0.077 | 0.063 | 0.597 | 0.209 | 0.070 | 0.561 | 0.117 | 0.831 | 0.037 | 0.040 | 0.982 | 0.079 | 0.275 | 0.318 |
| II | CGCGGC | 0.805 | 0.339 | 0.611 | 0.007 | 0.911 | 0.863 | 0.600 | 0.028 | 0.093 | 0.002 | 0.440 | 0.511 | 0.477 | 0.007 | 0.462 | 0.237 | 0.583 | 0.395 | 0.412 | 0.717 | 0.007 | 0.151 | 0.796 | 0.087 | 0.034 | 0.205 |
| II | GAGCCC | 0.911 | 0.964 | 0.392 | 0.488 | 0.859 | 0.801 | 0.727 | 0.944 | 0.664 | 0.171 | 0.847 | 0.932 | 0.836 | 0.367 | 0.830 | 0.403 | 0.935 | 0.871 | 0.659 | 0.954 | 0.216 | 0.080 | 0.971 | 0.539 | 0.597 | 0.702 |
| II | CGCCGA | 0.569 | 0.191 | 0.733 | 0.065 | 0.882 | 0.539 | 0.531 | 0.389 | 0.253 | 0.004 | 0.277 | 0.298 | 0.266 | 0.056 | 0.622 | 0.060 | 0.571 | 0.738 | 0.405 | 0.692 | 0.016 | 0.705 | 0.812 | 0.037 | 0.087 | 0.273 |
| II | CGCCCG | 0.686 | 0.157 | 0.780 | 0.253 | 0.751 | 0.744 | 0.361 | 0.715 | 0.023 | 0.000 | 0.121 | 0.181 | 0.087 | 0.011 | 0.199 | 0.045 | 0.326 | 0.235 | 0.019 | 0.554 | 0.000 | 0.051 | 0.766 | 0.069 | 0.023 | 0.102 |
| II | CGCCGT | 0.529 | 0.613 | 0.579 | 0.048 | 0.969 | 0.601 | 0.216 | 0.258 | 0.185 | 0.001 | 0.599 | 0.433 | 0.308 | 0.010 | 0.525 | 0.362 | 0.239 | 0.752 | 0.017 | 0.490 | 0.014 | 0.517 | 0.734 | 0.130 | 0.016 | 0.119 |
| II | CGTGCC | 0.422 | 0.741 | 0.798 | 0.099 | 0.775 | 0.680 | 0.558 | 0.893 | 0.367 | 0.027 | 0.601 | 0.434 | 0.520 | 0.191 | 0.454 | 0.282 | 0.095 | 0.714 | 0.114 | 0.776 | 0.046 | 0.204 | 0.806 | 0.188 | 0.002 | 0.018 |
| II | CCGAAC | 0.468 | 0.438 | 0.131 | 0.129 | 0.832 | 0.174 | 0.176 | 0.507 | 0.187 | 0.023 | 0.220 | 0.278 | 0.138 | 0.294 | 0.402 | 0.002 | 0.467 | 0.485 | 0.355 | 0.638 | 0.082 | 0.236 | 0.778 | 0.296 | 0.268 | 0.337 |
| II | CGGTTC | 0.716 | 0.621 | 0.249 | 0.078 | 0.734 | 0.151 | 0.334 | 0.638 | 0.023 | 0.018 | 0.289 | 0.668 | 0.019 | 0.086 | 0.091 | 0.028 | 0.286 | 0.676 | 0.133 | 0.655 | 0.096 | 0.161 | 0.631 | 0.121 | 0.223 | 0.369 |
| II | CGTGGG | 0.779 | 0.575 | 0.643 | 0.029 | 0.852 | 0.584 | 0.415 | 0.793 | 0.218 | 0.090 | 0.060 | 0.558 | 0.109 | 0.139 | 0.089 | 0.168 | 0.212 | 0.617 | 0.091 | 0.810 | 0.059 | 0.004 | 0.870 | 0.187 | 0.002 | 0.014 |
| II | CCGCCG | 0.640 | 0.519 | 0.671 | 0.134 | 0.969 | 0.602 | 0.642 | 0.736 | 0.059 | 0.000 | 0.218 | 0.408 | 0.121 | 0.003 | 0.719 | 0.113 | 0.647 | 0.887 | 0.150 | 0.841 | 0.002 | 0.118 | 0.895 | 0.031 | 0.020 | 0.169 |
| II | GCGCCA | 0.867 | 0.772 | 0.307 | 0.069 | 0.895 | 0.462 | 0.576 | 0.002 | 0.306 | 0.003 | 0.294 | 0.709 | 0.523 | 0.060 | 0.841 | 0.142 | 0.758 | 0.214 | 0.497 | 0.825 | 0.073 | 0.181 | 0.497 | 0.361 | 0.084 | 0.047 |
| II | TGGCGC | 0.919 | 0.532 | 0.573 | 0.069 | 0.888 | 0.558 | 0.118 | 0.003 | 0.247 | 0.006 | 0.247 | 0.787 | 0.437 | 0.027 | 0.747 | 0.045 | 0.665 | 0.084 | 0.275 | 0.652 | 0.039 | 0.497 | 0.365 | 0.088 | 0.058 | 0.085 |
| II | CGACCC | 0.921 | 0.770 | 0.801 | 0.436 | 0.946 | 0.549 | 0.682 | 0.942 | 0.754 | 0.119 | 0.190 | 0.956 | 0.127 | 0.491 | 0.243 | 0.309 | 0.056 | 0.896 | 0.198 | 0.914 | 0.057 | 0.155 | 0.907 | 0.024 | 0.031 | 0.638 |
| II | ACCGGC | 0.772 | 0.525 | 0.463 | 0.680 | 0.891 | 0.534 | 0.699 | 0.804 | 0.216 | 0.002 | 0.640 | 0.716 | 0.288 | 0.013 | 0.261 | 0.037 | 0.161 | 0.628 | 0.093 | 0.640 | 0.002 | 0.254 | 0.453 | 0.074 | 0.008 | 0.201 |
| II | CCCAGC | 0.831 | 0.792 | 0.670 | 0.056 | 0.859 | 0.573 | 0.519 | 0.860 | 0.455 | 0.051 | 0.144 | 0.548 | 0.181 | 0.153 | 0.291 | 0.209 | 0.216 | 0.383 | 0.256 | 0.779 | 0.071 | 0.006 | 0.867 | 0.224 | 0.006 | 0.075 |
| II | CTGGCC | 0.851 | 0.901 | 0.196 | 0.683 | 0.926 | 0.677 | 0.700 | 0.887 | 0.772 | 0.062 | 0.621 | 0.845 | 0.616 | 0.842 | 0.943 | 0.306 | 0.772 | 0.698 | 0.579 | 0.851 | 0.005 | 0.113 | 0.065 | 0.283 | 0.141 | 0.025 |
| II | GCCGGA | 0.751 | 0.390 | 0.623 | 0.233 | 0.904 | 0.239 | 0.621 | 0.858 | 0.630 | 0.019 | 0.227 | 0.799 | 0.682 | 0.029 | 0.893 | 0.104 | 0.529 | 0.623 | 0.080 | 0.777 | 0.001 | 0.323 | 0.773 | 0.333 | 0.199 | 0.483 |
| II | ACGTGC | 0.521 | 0.417 | 0.700 | 0.028 | 0.668 | 0.383 | 0.098 | 0.403 | 0.192 | 0.008 | 0.156 | 0.436 | 0.007 | 0.368 | 0.354 | 0.051 | 0.130 | 0.384 | 0.083 | 0.175 | 0.013 | 0.603 | 0.752 | 0.090 | 0.044 | 0.005 |
| II | CGGACC | 0.951 | 0.840 | 0.563 | 0.126 | 0.876 | 0.590 | 0.550 | 0.951 | 0.576 | 0.056 | 0.268 | 0.936 | 0.302 | 0.054 | 0.336 | 0.124 | 0.026 | 0.799 | 0.047 | 0.823 | 0.042 | 0.017 | 0.936 | 0.021 | 0.141 | 0.580 |
| II | GCGCTC | 0.901 | 0.627 | 0.097 | 0.186 | 0.819 | 0.793 | 0.293 | 0.265 | 0.573 | 0.036 | 0.406 | 0.738 | 0.147 | 0.074 | 0.702 | 0.228 | 0.789 | 0.843 | 0.535 | 0.843 | 0.213 | 0.554 | 0.606 | 0.303 | 0.007 | 0.353 |
| II | CAGCCC | 0.937 | 0.933 | 0.274 | 0.752 | 0.963 | 0.694 | 0.848 | 0.948 | 0.805 | 0.016 | 0.383 | 0.866 | 0.621 | 0.482 | 0.798 | 0.346 | 0.875 | 0.746 | 0.409 | 0.919 | 0.068 | 0.045 | 0.373 | 0.171 | 0.031 | 0.174 |
| II | GCGCGA | 0.265 | 0.473 | 0.542 | 0.170 | 0.671 | 0.285 | 0.245 | 0.003 | 0.273 | 0.036 | 0.050 | 0.413 | 0.227 | 0.019 | 0.637 | 0.012 | 0.195 | 0.599 | 0.145 | 0.427 | 0.090 | 0.093 | 0.092 | 0.033 | 0.012 | 0.096 |
| II | CCGTCC | 0.756 | 0.860 | 0.640 | 0.192 | 0.766 |       |       |       |       |       |       |       |       |       |       |       |       |       |       |       |       |       |       |       |       |       |

|    |        |       |       |       |       |       |       |       |       |       |       |       |       |       |       |       |       |       |       |       |       |       |       |       |       |       |       |
|----|--------|-------|-------|-------|-------|-------|-------|-------|-------|-------|-------|-------|-------|-------|-------|-------|-------|-------|-------|-------|-------|-------|-------|-------|-------|-------|-------|
| II | CGCGCA | 0.242 | 0.377 | 0.497 | 0.010 | 0.711 | 0.376 | 0.442 | 0.005 | 0.092 | 0.017 | 0.141 | 0.474 | 0.086 | 0.013 | 0.730 | 0.057 | 0.296 | 0.335 | 0.170 | 0.708 | 0.240 | 0.091 | 0.186 | 0.372 | 0.011 | 0.031 |
| II | GACGCG | 0.824 | 0.541 | 0.890 | 0.002 | 0.773 | 0.689 | 0.732 | 0.091 | 0.180 | 0.046 | 0.109 | 0.514 | 0.061 | 0.054 | 0.412 | 0.202 | 0.125 | 0.391 | 0.068 | 0.605 | 0.013 | 0.397 | 0.687 | 0.085 | 0.096 | 0.101 |
| II | TCGCCG | 0.583 | 0.701 | 0.591 | 0.066 | 0.779 | 0.567 | 0.330 | 0.531 | 0.495 | 0.004 | 0.101 | 0.360 | 0.313 | 0.033 | 0.509 | 0.118 | 0.441 | 0.643 | 0.267 | 0.646 | 0.004 | 0.587 | 0.884 | 0.036 | 0.130 | 0.312 |
| II | GCGGGA | 0.387 | 0.461 | 0.413 | 0.060 | 0.923 | 0.405 | 0.586 | 0.001 | 0.372 | 0.039 | 0.308 | 0.884 | 0.392 | 0.011 | 0.702 | 0.164 | 0.531 | 0.501 | 0.246 | 0.857 | 0.062 | 0.086 | 0.950 | 0.523 | 0.422 | 0.387 |
| II | TAGCGC | 0.607 | 0.495 | 0.134 | 0.133 | 0.508 | 0.335 | 0.283 | 0.177 | 0.643 | 0.028 | 0.072 | 0.557 | 0.377 | 0.033 | 0.658 | 0.009 | 0.356 | 0.590 | 0.421 | 0.389 | 0.257 | 0.521 | 0.757 | 0.255 | 0.030 | 0.104 |
| II | CGCACG | 0.653 | 0.404 | 0.453 | 0.060 | 0.874 | 0.467 | 0.438 | 0.449 | 0.031 | 0.031 | 0.513 | 0.408 | 0.347 | 0.052 | 0.502 | 0.081 | 0.020 | 0.473 | 0.059 | 0.567 | 0.074 | 0.044 | 0.740 | 0.145 | 0.003 | 0.090 |
| II | GTGCCG | 0.735 | 0.296 | 0.265 | 0.116 | 0.673 | 0.567 | 0.296 | 0.862 | 0.325 | 0.006 | 0.426 | 0.716 | 0.488 | 0.062 | 0.598 | 0.190 | 0.126 | 0.448 | 0.102 | 0.805 | 0.014 | 0.197 | 0.379 | 0.451 | 0.007 | 0.191 |
| II | GAGCGC | 0.804 | 0.645 | 0.126 | 0.190 | 0.864 | 0.689 | 0.638 | 0.413 | 0.473 | 0.074 | 0.433 | 0.665 | 0.281 | 0.073 | 0.855 | 0.496 | 0.706 | 0.745 | 0.307 | 0.771 | 0.173 | 0.449 | 0.322 | 0.487 | 0.044 | 0.469 |
| II | CCCGCT | 0.514 | 0.832 | 0.210 | 0.145 | 0.907 | 0.241 | 0.582 | 0.359 | 0.275 | 0.104 | 0.359 | 0.912 | 0.192 | 0.060 | 0.253 | 0.331 | 0.640 | 0.798 | 0.280 | 0.878 | 0.198 | 0.085 | 0.751 | 0.326 | 0.050 | 0.530 |
| II | GGTTCG | 0.708 | 0.728 | 0.118 | 0.327 | 0.784 | 0.082 | 0.609 | 0.706 | 0.118 | 0.064 | 0.191 | 0.610 | 0.022 | 0.174 | 0.039 | 0.033 | 0.589 | 0.653 | 0.155 | 0.669 | 0.209 | 0.497 | 0.733 | 0.359 | 0.026 | 0.412 |
| II | GGCCCT | 0.887 | 0.903 | 0.825 | 0.606 | 0.904 | 0.510 | 0.346 | 0.948 | 0.917 | 0.049 | 0.714 | 0.736 | 0.745 | 0.931 | 0.951 | 0.001 | 0.917 | 0.885 | 0.793 | 0.726 | 0.012 | 0.017 | 0.791 | 0.657 | 0.598 | 0.679 |
| II | GGTCCG | 0.788 | 0.752 | 0.676 | 0.120 | 0.779 | 0.624 | 0.659 | 0.792 | 0.561 | 0.063 | 0.174 | 0.698 | 0.192 | 0.079 | 0.551 | 0.072 | 0.027 | 0.777 | 0.044 | 0.772 | 0.023 | 0.101 | 0.822 | 0.014 | 0.305 | 0.320 |
| II | CCGAGC | 0.782 | 0.751 | 0.225 | 0.301 | 0.893 | 0.679 | 0.755 | 0.792 | 0.571 | 0.054 | 0.324 | 0.712 | 0.680 | 0.368 | 0.308 | 0.354 | 0.704 | 0.860 | 0.338 | 0.911 | 0.124 | 0.304 | 0.606 | 0.430 | 0.101 | 0.348 |
| II | GCGACC | 0.945 | 0.858 | 0.667 | 0.262 | 0.854 | 0.623 | 0.677 | 0.753 | 0.458 | 0.408 | 0.988 | 0.614 | 0.422 | 0.662 | 0.174 | 0.060 | 0.948 | 0.499 | 0.922 | 0.080 | 0.000 | 0.928 | 0.063 | 0.626 | 0.799 |       |
| II | GCCGGT | 0.867 | 0.546 | 0.295 | 0.686 | 0.794 | 0.712 | 0.313 | 0.855 | 0.358 | 0.004 | 0.564 | 0.559 | 0.142 | 0.012 | 0.244 | 0.036 | 0.530 | 0.786 | 0.156 | 0.632 | 0.002 | 0.172 | 0.823 | 0.070 | 0.146 | 0.141 |
| II | CGACCG | 0.485 | 0.011 | 0.600 | 0.162 | 0.895 | 0.669 | 0.347 | 0.800 | 0.544 | 0.007 | 0.088 | 0.508 | 0.034 | 0.108 | 0.253 | 0.033 | 0.019 | 0.573 | 0.177 | 0.679 | 0.008 | 0.211 | 0.941 | 0.012 | 0.099 | 0.254 |
| II | TCGCGG | 0.329 | 0.626 | 0.579 | 0.132 | 0.658 | 0.349 | 0.501 | 0.132 | 0.159 | 0.043 | 0.080 | 0.744 | 0.301 | 0.011 | 0.297 | 0.059 | 0.078 | 0.525 | 0.405 | 0.649 | 0.067 | 0.178 | 0.577 | 0.067 | 0.049 | 0.139 |
| II | CAGGCG | 0.648 | 0.683 | 0.684 | 0.294 | 0.802 | 0.343 | 0.712 | 0.624 | 0.457 | 0.023 | 0.120 | 0.813 | 0.406 | 0.166 | 0.515 | 0.234 | 0.365 | 0.369 | 0.102 | 0.813 | 0.027 | 0.521 | 0.020 | 0.225 | 0.151 | 0.282 |
| II | CGTCGT | 0.531 | 0.343 | 0.607 | 0.016 | 0.577 | 0.362 | 0.145 | 0.412 | 0.303 | 0.024 | 0.150 | 0.150 | 0.027 | 0.294 | 0.283 | 0.133 | 0.093 | 0.409 | 0.034 | 0.389 | 0.031 | 0.439 | 0.803 | 0.032 | 0.061 | 0.021 |
| II | CGCTCG | 0.565 | 0.625 | 0.287 | 0.268 | 0.716 | 0.708 | 0.328 | 0.531 | 0.237 | 0.080 | 0.217 | 0.765 | 0.382 | 0.154 | 0.453 | 0.262 | 0.567 | 0.703 | 0.458 | 0.808 | 0.062 | 0.288 | 0.679 | 0.654 | 0.191 | 0.337 |
| II | CCCGGG | 0.917 | 0.961 | 0.829 | 0.196 | 0.993 | 0.929 | 0.835 | 0.841 | 0.392 | 0.241 | 0.203 | 0.644 | 0.657 | 0.001 | 0.606 | 0.023 | 0.583 | 0.941 | 0.526 | 0.957 | 0.003 | 0.015 | 0.986 | 0.236 | 0.069 | 0.539 |
| II | CCGACG | 0.701 | 0.453 | 0.687 | 0.043 | 0.786 | 0.467 | 0.537 | 0.721 | 0.150 | 0.001 | 0.273 | 0.491 | 0.107 | 0.159 | 0.543 | 0.161 | 0.256 | 0.717 | 0.224 | 0.770 | 0.007 | 0.486 | 0.880 | 0.050 | 0.063 | 0.160 |
| II | GCCGGG | 0.746 | 0.676 | 0.525 | 0.315 | 0.920 | 0.718 | 0.453 | 0.933 | 0.494 | 0.017 | 0.243 | 0.899 | 0.484 | 0.018 | 0.675 | 0.124 | 0.438 | 0.881 | 0.218 | 0.916 | 0.006 | 0.036 | 0.817 | 0.360 | 0.076 | 0.523 |
| II | GGGTCC | 0.916 | 0.972 | 0.677 | 0.361 | 0.906 | 0.688 | 0.763 | 0.962 | 0.722 | 0.364 | 0.491 | 0.985 | 0.142 | 0.465 | 0.348 | 0.408 | 0.060 | 0.837 | 0.438 | 0.913 | 0.081 | 0.002 | 0.985 | 0.034 | 0.415 | 0.679 |
| II | GCCGCG | 0.875 | 0.743 | 0.611 | 0.008 | 0.908 | 0.718 | 0.526 | 0.015 | 0.110 | 0.002 | 0.292 | 0.840 | 0.328 | 0.011 | 0.348 | 0.236 | 0.420 | 0.343 | 0.268 | 0.780 | 0.007 | 0.231 | 0.769 | 0.236 | 0.028 | 0.062 |
| II | CGGCGA | 0.601 | 0.487 | 0.630 | 0.155 | 0.745 | 0.409 | 0.323 | 0.674 | 0.261 | 0.005 | 0.250 | 0.461 | 0.337 | 0.048 | 0.829 | 0.101 | 0.295 | 0.652 | 0.242 | 0.719 | 0.003 | 0.449 | 0.833 | 0.040 | 0.120 | 0.469 |
| II | TCCCGC | 0.413 | 0.472 | 0.631 | 0.048 | 0.911 | 0.337 | 0.784 | 0.006 | 0.191 | 0.054 | 0.168 | 0.366 | 0.247 | 0.007 | 0.830 | 0.075 | 0.385 | 0.285 | 0.284 | 0.885 | 0.079 | 0.074 | 0.937 | 0.244 | 0.427 | 0.330 |
| II | CCGTCC | 0.720 | 0.628 | 0.833 | 0.168 | 0.912 | 0.484 | 0.569 | 0.805 | 0.496 | 0.011 | 0.345 | 0.717 | 0.059 | 0.127 | 0.261 | 0.177 | 0.312 | 0.628 | 0.240 | 0.661 | 0.009 | 0.260 | 0.876 | 0.079 | 0.263 | 0.331 |
| II | CCGCGT | 0.627 | 0.402 | 0.751 | 0.000 | 0.907 | 0.401 | 0.334 | 0.006 | 0.136 | 0.027 | 0.382 | 0.564 | 0.215 | 0.007 | 0.229 | 0.125 | 0.267 | 0.500 | 0.049 | 0.485 | 0.102 | 0.348 | 0.867 | 0.138 | 0.070 | 0.069 |
| II | CAGCGT | 0.282 | 0.400 | 0.607 | 0.000 | 0.630 | 0.259 | 0.012 | 0.035 | 0.072 | 0.032 | 0.170 | 0.293 | 0.159 | 0.020 | 0.181 | 0.050 | 0.208 | 0.443 | 0.225 | 0.263 | 0.044 | 0.384 | 0.781 | 0.084 | 0.046 | 0.026 |
| II | CGCCGG | 0.701 | 0.477 | 0.513 | 0.169 | 0.907 | 0.814 | 0.511 | 0.589 | 0.125 | 0.002 | 0.107 | 0.313 | 0.099 | 0.007 | 0.482 | 0.115 | 0.403 | 0.860 | 0.122 | 0.696 | 0.000 | 0.093 | 0.628 | 0.122 | 0.089 | 0.283 |
| II | GCGGAG | 0.918 | 0.755 | 0.337 | 0.134 | 0.772 | 0.615 | 0.242 | 0.807 | 0.266 | 0.060 | 0.511 | 0.770 | 0.509 | 0.009 | 0.616 | 0.249 | 0.662 | 0.636 | 0.411 | 0.932 | 0.203 | 0.323 | 0.746 | 0.141 | 0.434 | 0.425 |
| II | AGCGGG | 0.624 | 0.864 | 0.244 | 0.307 | 0.865 | 0.416 | 0.490 | 0.552 | 0.231 | 0.101 | 0.115 | 0.891 | 0.393 | 0.028 | 0.637 | 0.250 | 0.683 | 0.805 | 0.336 | 0.836 | 0.215 | 0.080 | 0.922 | 0.736 | 0.582 | 0.502 |
| II | CGGCGT | 0.581 | 0.561 | 0.497 | 0.039 | 0.804 | 0.331 | 0.428 | 0.834 | 0.671 | 0.003 | 0.192 | 0.303 | 0.280 | 0.025 | 0.375 | 0.176 | 0.294 | 0.687 | 0.043 | 0.461 | 0.004 | 0.706 | 0.571 | 0.094 | 0.006 | 0.116 |
| II | GACGCG | 0.768 | 0.832 | 0.795 | 0.203 | 0.825 | 0.691 | 0.623 | 0.846 | 0.680 | 0.001 | 0.305 | 0.701 | 0.053 | 0.174 | 0.828 | 0.203 | 0.114 | 0.602 | 0.214 | 0.652 | 0.006 | 0.281 | 0.864 | 0.029 | 0.163 | 0.238 |
| II | GCGCCT | 0.565 | 0.653 | 0.547 | 0.098 | 0.786 | 0.311 | 0.226 | 0.007 | 0.602 | 0.012 | 0.546 | 0.879 | 0.330 | 0.058 | 0.826 | 0.366 | 0.533 | 0.639 | 0.294 | 0.678 | 0.033 | 0.237 | 0.582 | 0.075 | 0.165 | 0.321 |
| II | CCGGCG | 0.916 | 0.739 | 0.514 | 0.256 | 0.968 | 0.727 | 0.534 | 0.883 | 0.084 | 0.001 | 0.132 | 0.519 | 0.289 | 0.001 | 0.465 | 0.162 | 0.282 | 0.904 | 0.268 | 0.801 | 0.000 | 0.208 | 0.817 | 0.032 | 0.038 | 0.404 |
| II | GGCGGA | 0.696 | 0.481 | 0.447 | 0.180 | 0.908 | 0.601 | 0.544 | 0.912 | 0.509 | 0.010 | 0.309 | 0.572 | 0.353 | 0.015 | 0.411 | 0.082 | 0.437 | 0.618 | 0.316 | 0.886 | 0.011 | 0.128 | 0.797 | 0.156 | 0.291 | 0.489 |
| II | CCGGAC | 0.801 | 0.482 | 0.604 | 0.091 | 0.891 | 0.604 | 0.672 | 0.801 | 0.257 | 0.032 | 0.251 | 0.792 | 0.098 | 0.006 | 0.285 | 0.087 | 0.081 | 0.678 | 0.016 | 0.722 | 0.006 | 0.102 | 0.817 | 0.068 | 0.295 | 0.160 |
| II | ACGACG | 0.447 | 0.400 | 0.656 | 0.020 | 0.579 | 0.385 | 0.125 | 0.428 | 0.355 | 0.016 | 0.130 | 0.328 | 0.050 | 0.274 | 0.451 | 0.081 | 0.070 | 0.407 | 0.048 | 0.363 | 0.025 | 0.319 | 0.243 | 0.039 | 0.038 | 0.020 |
| II | TCGCGT | 0.251 | 0.399 | 0.474 | 0.007 | 0.402 | 0.366 | 0.194 | 0.293 | 0.177 | 0.076 | 0.012 | 0.378 | 0.050 | 0.082 | 0.069 | 0.050 | 0.006 | 0.190 | 0.048 | 0.297 | 0.127 | 0.088 | 0.716 | 0.034 | 0.017 | 0.005 |
| II | GCCGGC | 0.732 | 0.050 | 0.614 | 0.380 | 0.785 | 0.874 | 0.092 | 0.740 | 0.249 | 0.000 | 0.390 | 0.351 | 0.048 | 0.026 | 0.699 | 0.044 | 0.550 | 0.515 | 0.220 | 0.710 | 0.000 | 0.049 | 0.181 | 0.012 | 0.018 | 0.147 |
| II | CAGCCG | 0.708 | 0.724 | 0.324 | 0.242 | 0.879 | 0.680 | 0.650 | 0.716 | 0.234 | 0.001 | 0.432 | 0.676 | 0.263 | 0.102 | 0.661 | 0.228 | 0.571 | 0.428 | 0.194 | 0.777 | 0.046 | 0.191 | 0.488 | 0.101 | 0.040 | 0.241 |
| II | TCCGGC | 0.673 | 0.205 | 0.563 | 0.171 | 0.933 | 0.506 | 0.526 | 0.866 | 0.586 | 0.023 | 0.107 | 0.560 | 0.389 | 0.036 | 0.798 | 0.028 | 0.657 | 0.608 | 0.106 | 0.810 | 0.001 | 0.308 | 0.928 | 0.119 | 0.116 | 0.220 |
| II | CCAGT  | 0.760 | 0.760 | 0.033 | 0.377 | 0.901 | 0.    |       |       |       |       |       |       |       |       |       |       |       |       |       |       |       |       |       |       |       |       |

|    |        |       |       |       |       |       |       |       |       |       |       |       |       |       |       |       |       |       |       |       |       |       |       |       |       |       |       |
|----|--------|-------|-------|-------|-------|-------|-------|-------|-------|-------|-------|-------|-------|-------|-------|-------|-------|-------|-------|-------|-------|-------|-------|-------|-------|-------|-------|
| II | GAGCCG | 0.806 | 0.721 | 0.621 | 0.243 | 0.879 | 0.614 | 0.713 | 0.875 | 0.913 | 0.009 | 0.534 | 0.856 | 0.788 | 0.200 | 0.858 | 0.405 | 0.677 | 0.663 | 0.626 | 0.936 | 0.047 | 0.729 | 0.869 | 0.471 | 0.564 | 0.326 |
| II | GACGTC | 0.482 | 0.571 | 0.668 | 0.067 | 0.651 | 0.557 | 0.253 | 0.457 | 0.317 | 0.008 | 0.066 | 0.502 | 0.000 | 0.533 | 0.607 | 0.084 | 0.012 | 0.443 | 0.222 | 0.193 | 0.008 | 0.814 | 0.325 | 0.025 | 0.093 | 0.002 |
| II | CGGCAG | 0.838 | 0.050 | 0.364 | 0.301 | 0.768 | 0.449 | 0.461 | 0.759 | 0.371 | 0.003 | 0.133 | 0.612 | 0.180 | 0.060 | 0.394 | 0.092 | 0.465 | 0.151 | 0.051 | 0.831 | 0.011 | 0.343 | 0.071 | 0.178 | 0.171 | 0.288 |
| II | ACCCGG | 0.714 | 0.880 | 0.617 | 0.067 | 0.943 | 0.602 | 0.296 | 0.730 | 0.381 | 0.117 | 0.294 | 0.523 | 0.199 | 0.004 | 0.052 | 0.037 | 0.253 | 0.851 | 0.301 | 0.701 | 0.014 | 0.060 | 0.666 | 0.152 | 0.065 | 0.115 |
| II | CCCGAA | 0.345 | 0.583 | 0.395 | 0.333 | 0.669 | 0.120 | 0.352 | 0.837 | 0.359 | 0.294 | 0.346 | 0.622 | 0.534 | 0.098 | 0.557 | 0.068 | 0.530 | 0.776 | 0.468 | 0.618 | 0.110 | 0.152 | 0.806 | 0.480 | 0.182 | 0.448 |
| II | GCCGTC | 0.799 | 0.841 | 0.514 | 0.268 | 0.861 | 0.610 | 0.165 | 0.855 | 0.609 | 0.000 | 0.586 | 0.762 | 0.038 | 0.138 | 0.707 | 0.408 | 0.266 | 0.716 | 0.045 | 0.654 | 0.010 | 0.217 | 0.732 | 0.010 | 0.219 | 0.240 |
| II | TCGGGT | 0.481 | 0.399 | 0.403 | 0.210 | 0.688 | 0.215 | 0.108 | 0.232 | 0.122 | 0.029 | 0.068 | 0.248 | 0.079 | 0.201 | 0.014 | 0.028 | 0.096 | 0.447 | 0.132 | 0.593 | 0.059 | 0.019 | 0.687 | 0.036 | 0.156 | 0.035 |
| II | CGGTCC | 0.898 | 0.453 | 0.377 | 0.173 | 0.913 | 0.790 | 0.742 | 0.909 | 0.534 | 0.027 | 0.203 | 0.934 | 0.055 | 0.095 | 0.478 | 0.211 | 0.007 | 0.653 | 0.078 | 0.860 | 0.019 | 0.004 | 0.891 | 0.007 | 0.104 | 0.207 |
| II | TCCGCC | 0.751 | 0.809 | 0.702 | 0.250 | 0.925 | 0.445 | 0.505 | 0.897 | 0.385 | 0.012 | 0.089 | 0.765 | 0.399 | 0.018 | 0.421 | 0.102 | 0.470 | 0.820 | 0.484 | 0.823 | 0.008 | 0.181 | 0.833 | 0.106 | 0.094 | 0.388 |
| II | GTCCGC | 0.617 | 0.690 | 0.273 | 0.070 | 0.824 | 0.397 | 0.583 | 0.700 | 0.445 | 0.021 | 0.449 | 0.883 | 0.124 | 0.031 | 0.326 | 0.414 | 0.064 | 0.480 | 0.065 | 0.640 | 0.030 | 0.149 | 0.839 | 0.059 | 0.140 | 0.198 |
| II | CTCGCG | 0.793 | 0.614 | 0.303 | 0.032 | 0.852 | 0.621 | 0.542 | 0.185 | 0.512 | 0.068 | 0.125 | 0.685 | 0.306 | 0.046 | 0.131 | 0.208 | 0.175 | 0.771 | 0.149 | 0.853 | 0.119 | 0.342 | 0.360 | 0.106 | 0.084 | 0.286 |
| II | CGTCGC | 0.567 | 0.426 | 0.800 | 0.054 | 0.754 | 0.648 | 0.288 | 0.432 | 0.113 | 0.026 | 0.304 | 0.650 | 0.048 | 0.135 | 0.407 | 0.221 | 0.240 | 0.323 | 0.107 | 0.637 | 0.025 | 0.454 | 0.617 | 0.169 | 0.041 | 0.080 |
| II | CGAACC | 0.786 | 0.724 | 0.220 | 0.235 | 0.816 | 0.177 | 0.430 | 0.706 | 0.120 | 0.076 | 0.289 | 0.442 | 0.015 | 0.145 | 0.032 | 0.044 | 0.611 | 0.631 | 0.113 | 0.694 | 0.114 | 0.200 | 0.586 | 0.431 | 0.227 | 0.389 |
| II | GTCCGC | 0.928 | 0.875 | 0.680 | 0.098 | 0.934 | 0.609 | 0.725 | 0.886 | 0.633 | 0.005 | 0.322 | 0.902 | 0.093 | 0.291 | 0.408 | 0.502 | 0.303 | 0.902 | 0.095 | 0.762 | 0.015 | 0.579 | 0.719 | 0.100 | 0.198 | 0.225 |
| II | CCGGTC | 0.814 | 0.302 | 0.518 | 0.477 | 0.852 | 0.687 | 0.527 | 0.851 | 0.507 | 0.042 | 0.146 | 0.590 | 0.018 | 0.035 | 0.045 | 0.053 | 0.004 | 0.771 | 0.156 | 0.678 | 0.005 | 0.064 | 0.808 | 0.004 | 0.081 | 0.162 |
| II | CGACGG | 0.675 | 0.583 | 0.838 | 0.141 | 0.692 | 0.639 | 0.416 | 0.843 | 0.310 | 0.016 | 0.415 | 0.628 | 0.064 | 0.139 | 0.393 | 0.161 | 0.131 | 0.643 | 0.184 | 0.577 | 0.011 | 0.211 | 0.807 | 0.070 | 0.098 | 0.327 |
| II | TACCCG | 0.401 | 0.145 | 0.454 | 0.137 | 0.524 | 0.422 | 0.271 | 0.022 | 0.158 | 0.107 | 0.260 | 0.119 | 0.131 | 0.072 | 0.038 | 0.013 | 0.168 | 0.451 | 0.065 | 0.514 | 0.035 | 0.065 | 0.774 | 0.158 | 0.198 | 0.225 |
| II | CCAGGC | 0.872 | 0.841 | 0.711 | 0.635 | 0.959 | 0.516 | 0.781 | 0.881 | 0.478 | 0.066 | 0.350 | 0.944 | 0.757 | 0.663 | 0.154 | 0.178 | 0.725 | 0.762 | 0.366 | 0.905 | 0.024 | 0.152 | 0.208 | 0.380 | 0.478 | 0.417 |
| II | GACCCG | 0.639 | 0.036 | 0.540 | 0.392 | 0.869 | 0.418 | 0.507 | 0.861 | 0.479 | 0.023 | 0.153 | 0.656 | 0.032 | 0.005 | 0.106 | 0.027 | 0.004 | 0.771 | 0.054 | 0.539 | 0.004 | 0.062 | 0.694 | 0.003 | 0.026 | 0.066 |
| II | TGACGG | 0.587 | 0.439 | 0.289 | 0.277 | 0.700 | 0.584 | 0.256 | 0.378 | 0.294 | 0.007 | 0.169 | 0.545 | 0.012 | 0.058 | 0.384 | 0.135 | 0.013 | 0.461 | 0.108 | 0.293 | 0.062 | 0.308 | 0.084 | 0.023 | 0.104 | 0.004 |
| II | ACCCGT | 0.618 | 0.601 | 0.450 | 0.469 | 0.704 | 0.366 | 0.354 | 0.652 | 0.365 | 0.003 | 0.268 | 0.462 | 0.056 | 0.112 | 0.106 | 0.036 | 0.048 | 0.578 | 0.081 | 0.495 | 0.030 | 0.179 | 0.357 | 0.038 | 0.012 | 0.144 |
| II | TAGCCG | 0.667 | 0.821 | 0.231 | 0.597 | 0.759 | 0.681 | 0.765 | 0.835 | 0.799 | 0.144 | 0.551 | 0.895 | 0.245 | 0.156 | 0.765 | 0.142 | 0.745 | 0.709 | 0.706 | 0.638 | 0.113 | 0.102 | 0.939 | 0.673 | 0.340 | 0.150 |
| II | GGCGCA | 0.374 | 0.367 | 0.459 | 0.346 | 0.651 | 0.488 | 0.180 | 0.224 | 0.398 | 0.006 | 0.121 | 0.300 | 0.147 | 0.033 | 0.160 | 0.182 | 0.292 | 0.116 | 0.154 | 0.711 | 0.052 | 0.080 | 0.303 | 0.143 | 0.059 | 0.050 |
| II | CACCGG | 0.733 | 0.745 | 0.329 | 0.219 | 0.962 | 0.789 | 0.847 | 0.902 | 0.099 | 0.018 | 0.253 | 0.706 | 0.095 | 0.024 | 0.413 | 0.063 | 0.646 | 0.648 | 0.136 | 0.653 | 0.004 | 0.121 | 0.942 | 0.153 | 0.055 | 0.079 |
| II | CGGCAC | 0.786 | 0.295 | 0.323 | 0.087 | 0.763 | 0.647 | 0.590 | 0.854 | 0.459 | 0.006 | 0.512 | 0.807 | 0.271 | 0.082 | 0.662 | 0.196 | 0.239 | 0.428 | 0.122 | 0.666 | 0.017 | 0.059 | 0.644 | 0.539 | 0.010 | 0.147 |
| II | AACCCG | 0.369 | 0.698 | 0.303 | 0.072 | 0.626 | 0.121 | 0.312 | 0.437 | 0.322 | 0.149 | 0.462 | 0.458 | 0.039 | 0.010 | 0.015 | 0.078 | 0.181 | 0.700 | 0.168 | 0.648 | 0.117 | 0.177 | 0.671 | 0.256 | 0.046 | 0.086 |
| II | ACGGCA | 0.479 | 0.165 | 0.415 | 0.195 | 0.592 | 0.358 | 0.196 | 0.455 | 0.388 | 0.012 | 0.255 | 0.236 | 0.132 | 0.094 | 0.183 | 0.057 | 0.003 | 0.211 | 0.020 | 0.449 | 0.028 | 0.243 | 0.492 | 0.258 | 0.060 | 0.073 |
| II | CGGAGG | 0.824 | 0.942 | 0.879 | 0.110 | 0.990 | 0.250 | 0.942 | 0.974 | 0.762 | 0.139 | 0.190 | 0.906 | 0.590 | 0.098 | 0.262 | 0.244 | 0.815 | 0.958 | 0.081 | 0.902 | 0.133 | 0.299 | 0.975 | 0.121 | 0.505 | 0.615 |
| II | GGACCG | 0.943 | 0.825 | 0.762 | 0.201 | 0.838 | 0.707 | 0.778 | 0.945 | 0.592 | 0.024 | 0.236 | 0.942 | 0.079 | 0.211 | 0.657 | 0.159 | 0.010 | 0.830 | 0.080 | 0.821 | 0.056 | 0.007 | 0.758 | 0.011 | 0.107 | 0.472 |
| II | TCGGCG | 0.624 | 0.301 | 0.544 | 0.052 | 0.844 | 0.731 | 0.387 | 0.624 | 0.128 | 0.005 | 0.069 | 0.646 | 0.391 | 0.062 | 0.619 | 0.071 | 0.371 | 0.652 | 0.392 | 0.508 | 0.011 | 0.544 | 0.803 | 0.115 | 0.084 | 0.366 |
| II | CGCGTA | 0.270 | 0.235 | 0.551 | 0.001 | 0.586 | 0.366 | 0.311 | 0.007 | 0.104 | 0.016 | 0.147 | 0.226 | 0.145 | 0.028 | 0.229 | 0.022 | 0.020 | 0.373 | 0.029 | 0.348 | 0.117 | 0.154 | 0.666 | 0.099 | 0.023 | 0.005 |
| II | CTCCGC | 0.894 | 0.873 | 0.178 | 0.162 | 0.926 | 0.422 | 0.641 | 0.888 | 0.115 | 0.062 | 0.118 | 0.868 | 0.511 | 0.014 | 0.725 | 0.234 | 0.734 | 0.700 | 0.411 | 0.967 | 0.312 | 0.213 | 0.664 | 0.217 | 0.185 | 0.638 |
| II | GACACG | 0.402 | 0.021 | 0.411 | 0.005 | 0.518 | 0.502 | 0.238 | 0.467 | 0.126 | 0.064 | 0.104 | 0.403 | 0.054 | 0.143 | 0.531 | 0.196 | 0.005 | 0.293 | 0.078 | 0.351 | 0.025 | 0.185 | 0.236 | 0.141 | 0.008 | 0.003 |
| II | GCCGCC | 0.868 | 0.780 | 0.581 | 0.362 | 0.951 | 0.595 | 0.702 | 0.788 | 0.317 | 0.000 | 0.467 | 0.321 | 0.176 | 0.020 | 0.771 | 0.377 | 0.746 | 0.829 | 0.150 | 0.633 | 0.005 | 0.087 | 0.838 | 0.003 | 0.023 | 0.315 |
| II | CGGACG | 0.686 | 0.743 | 0.725 | 0.062 | 0.839 | 0.552 | 0.444 | 0.806 | 0.254 | 0.019 | 0.152 | 0.440 | 0.096 | 0.066 | 0.245 | 0.312 | 0.123 | 0.634 | 0.018 | 0.704 | 0.004 | 0.286 | 0.787 | 0.141 | 0.195 | 0.311 |
| II | CGGCTC | 0.883 | 0.773 | 0.514 | 0.407 | 0.824 | 0.489 | 0.667 | 0.854 | 0.944 | 0.016 | 0.398 | 0.903 | 0.749 | 0.104 | 0.741 | 0.428 | 0.746 | 0.793 | 0.266 | 0.822 | 0.072 | 0.412 | 0.954 | 0.196 | 0.313 | 0.698 |
| II | GGCACG | 0.817 | 0.767 | 0.851 | 0.098 | 0.756 | 0.774 | 0.720 | 0.860 | 0.662 | 0.040 | 0.324 | 0.818 | 0.458 | 0.249 | 0.903 | 0.062 | 0.036 | 0.710 | 0.089 | 0.768 | 0.055 | 0.051 | 0.743 | 0.362 | 0.005 | 0.071 |
| II | GCTCGG | 0.543 | 0.465 | 0.222 | 0.144 | 0.860 | 0.740 | 0.505 | 0.773 | 0.494 | 0.015 | 0.366 | 0.775 | 0.423 | 0.175 | 0.769 | 0.314 | 0.642 | 0.221 | 0.172 | 0.828 | 0.158 | 0.365 | 0.274 | 0.305 | 0.166 | 0.355 |
| II | GACCCG | 0.941 | 0.914 | 0.549 | 0.204 | 0.914 | 0.570 | 0.692 | 0.790 | 0.746 | 0.004 | 0.622 | 0.919 | 0.296 | 0.199 | 0.775 | 0.466 | 0.262 | 0.713 | 0.241 | 0.836 | 0.019 | 0.439 | 0.913 | 0.224 | 0.272 | 0.244 |
| II | ATCGCG | 0.265 | 0.334 | 0.604 | 0.049 | 0.694 | 0.216 | 0.237 | 0.119 | 0.142 | 0.037 | 0.009 | 0.467 | 0.107 | 0.021 | 0.214 | 0.013 | 0.049 | 0.390 | 0.136 | 0.236 | 0.128 | 0.293 | 0.602 | 0.061 | 0.014 | 0.023 |
| II | CCGGGA | 0.651 | 0.287 | 0.533 | 0.275 | 0.932 | 0.456 | 0.559 | 0.465 | 0.401 | 0.191 | 0.275 | 0.660 | 0.305 | 0.016 | 0.438 | 0.058 | 0.259 | 0.788 | 0.352 | 0.868 | 0.017 | 0.143 | 0.953 | 0.219 | 0.586 | 0.518 |
| II | TACGGC | 0.483 | 0.556 | 0.493 | 0.210 | 0.717 | 0.513 | 0.500 | 0.520 | 0.316 | 0.007 | 0.185 | 0.153 | 0.306 | 0.061 | 0.586 | 0.129 | 0.014 | 0.473 | 0.004 | 0.404 | 0.022 | 0.361 | 0.551 | 0.453 | 0.054 | 0.226 |
| II | ACCCGT | 0.673 | 0.366 | 0.402 | 0.385 | 0.790 | 0.476 | 0.532 | 0.788 | 0.112 | 0.008 | 0.096 | 0.297 | 0.011 | 0.038 | 0.061 | 0.000 | 0.068 | 0.696 | 0.194 | 0.302 | 0.002 | 0.112 | 0.565 | 0.049 | 0.067 | 0.078 |
| II | GGCTCG | 0.892 | 0.820 | 0.409 | 0.397 | 0.844 | 0.533 | 0.755 | 0.856 | 0.570 | 0.107 | 0.418 | 0.800 | 0.590 | 0.775 | 0.859 | 0.474 | 0.781 | 0.829 | 0.535 | 0.793 | 0.100 | 0.518 | 0.817 | 0.618 | 0.109 | 0.722 |
| II | AGGCGG | 0.581 | 0.761 | 0.768 | 0.751 | 0.856 |       |       |       |       |       |       |       |       |       |       |       |       |       |       |       |       |       |       |       |       |       |

|    |        |       |       |       |       |       |       |       |       |       |       |       |       |       |       |       |       |       |       |       |       |       |       |       |       |       |       |
|----|--------|-------|-------|-------|-------|-------|-------|-------|-------|-------|-------|-------|-------|-------|-------|-------|-------|-------|-------|-------|-------|-------|-------|-------|-------|-------|-------|
| II | CCCGCC | 0.599 | 0.660 | 0.491 | 0.292 | 0.978 | 0.847 | 0.358 | 0.008 | 0.087 | 0.007 | 0.228 | 0.394 | 0.159 | 0.031 | 0.416 | 0.081 | 0.474 | 0.810 | 0.141 | 0.889 | 0.008 | 0.022 | 0.940 | 0.459 | 0.028 | 0.354 |
| II | CGGTGC | 0.827 | 0.016 | 0.611 | 0.147 | 0.865 | 0.779 | 0.628 | 0.816 | 0.645 | 0.009 | 0.186 | 0.602 | 0.037 | 0.160 | 0.251 | 0.127 | 0.024 | 0.809 | 0.072 | 0.770 | 0.007 | 0.129 | 0.897 | 0.018 | 0.007 | 0.363 |
| II | GGTTCG | 0.914 | 0.062 | 0.574 | 0.138 | 0.803 | 0.803 | 0.567 | 0.788 | 0.786 | 0.071 | 0.417 | 0.748 | 0.090 | 0.188 | 0.606 | 0.253 | 0.023 | 0.583 | 0.419 | 0.910 | 0.011 | 0.480 | 0.893 | 0.021 | 0.116 | 0.350 |
| II | CCCGAG | 0.480 | 0.946 | 0.482 | 0.080 | 0.933 | 0.467 | 0.854 | 0.910 | 0.344 | 0.211 | 0.471 | 0.952 | 0.475 | 0.255 | 0.308 | 0.182 | 0.587 | 0.910 | 0.337 | 0.947 | 0.156 | 0.179 | 0.950 | 0.098 | 0.051 | 0.373 |
| II | AGGGCC | 0.971 | 0.908 | 0.863 | 0.480 | 0.862 | 0.730 | 0.722 | 0.969 | 0.936 | 0.057 | 0.683 | 0.934 | 0.863 | 0.923 | 0.981 | 0.002 | 0.959 | 0.969 | 0.906 | 0.951 | 0.024 | 0.026 | 0.729 | 0.559 | 0.378 | 0.716 |
| II | GGCGAC | 0.777 | 0.065 | 0.497 | 0.197 | 0.836 | 0.164 | 0.598 | 0.667 | 0.545 | 0.011 | 0.610 | 0.630 | 0.102 | 0.148 | 0.754 | 0.376 | 0.074 | 0.358 | 0.430 | 0.737 | 0.033 | 0.295 | 0.903 | 0.021 | 0.144 | 0.216 |
| II | CGCGGA | 0.699 | 0.496 | 0.570 | 0.007 | 0.715 | 0.486 | 0.309 | 0.025 | 0.104 | 0.041 | 0.198 | 0.476 | 0.408 | 0.001 | 0.427 | 0.117 | 0.145 | 0.612 | 0.136 | 0.787 | 0.045 | 0.411 | 0.723 | 0.052 | 0.017 | 0.129 |
| II | TTCCGG | 0.277 | 0.692 | 0.185 | 0.087 | 0.889 | 0.191 | 0.242 | 0.841 | 0.080 | 0.185 | 0.111 | 0.734 | 0.320 | 0.000 | 0.705 | 0.029 | 0.095 | 0.623 | 0.059 | 0.820 | 0.007 | 0.348 | 0.736 | 0.091 | 0.298 | 0.192 |
| II | GCAGCG | 0.472 | 0.586 | 0.162 | 0.056 | 0.847 | 0.714 | 0.431 | 0.781 | 0.203 | 0.017 | 0.372 | 0.602 | 0.612 | 0.068 | 0.791 | 0.060 | 0.609 | 0.157 | 0.297 | 0.754 | 0.090 | 0.275 | 0.071 | 0.082 | 0.190 | 0.348 |
| II | ATCCGG | 0.299 | 0.652 | 0.565 | 0.099 | 0.743 | 0.263 | 0.578 | 0.582 | 0.126 | 0.103 | 0.027 | 0.547 | 0.416 | 0.004 | 0.516 | 0.011 | 0.510 | 0.514 | 0.075 | 0.503 | 0.012 | 0.146 | 0.846 | 0.100 | 0.085 | 0.273 |
| II | ACGCGA | 0.337 | 0.270 | 0.453 | 0.008 | 0.611 | 0.367 | 0.203 | 0.323 | 0.117 | 0.105 | 0.130 | 0.226 | 0.125 | 0.095 | 0.116 | 0.102 | 0.018 | 0.341 | 0.103 | 0.537 | 0.127 | 0.144 | 0.426 | 0.093 | 0.018 | 0.036 |
| II | GGCGGC | 0.769 | 0.619 | 0.769 | 0.358 | 0.957 | 0.673 | 0.571 | 0.333 | 0.666 | 0.000 | 0.289 | 0.688 | 0.305 | 0.015 | 0.705 | 0.217 | 0.732 | 0.711 | 0.320 | 0.708 | 0.003 | 0.144 | 0.760 | 0.005 | 0.019 | 0.275 |
| II | GTCGGC | 0.884 | 0.057 | 0.260 | 0.258 | 0.755 | 0.738 | 0.540 | 0.790 | 0.532 | 0.000 | 0.454 | 0.810 | 0.203 | 0.229 | 0.669 | 0.033 | 0.691 | 0.507 | 0.261 | 0.892 | 0.011 | 0.581 | 0.584 | 0.060 | 0.150 | 0.090 |
| II | GACGGT | 0.572 | 0.384 | 0.342 | 0.099 | 0.743 | 0.263 | 0.578 | 0.582 | 0.126 | 0.103 | 0.027 | 0.547 | 0.416 | 0.004 | 0.516 | 0.011 | 0.510 | 0.514 | 0.075 | 0.503 | 0.012 | 0.146 | 0.846 | 0.100 | 0.085 | 0.273 |
| II | GGACGG | 0.731 | 0.757 | 0.804 | 0.380 | 0.754 | 0.615 | 0.136 | 0.915 | 0.618 | 0.002 | 0.596 | 0.773 | 0.113 | 0.144 | 0.700 | 0.105 | 0.100 | 0.880 | 0.017 | 0.927 | 0.005 | 0.088 | 0.981 | 0.114 | 0.238 | 0.602 |
| II | TGCGGC | 0.555 | 0.633 | 0.395 | 0.263 | 0.946 | 0.542 | 0.634 | 0.632 | 0.353 | 0.003 | 0.562 | 0.857 | 0.238 | 0.030 | 0.483 | 0.161 | 0.495 | 0.195 | 0.085 | 0.802 | 0.007 | 0.204 | 0.252 | 0.161 | 0.100 | 0.100 |
| II | GCTCCG | 0.832 | 0.785 | 0.225 | 0.074 | 0.891 | 0.658 | 0.602 | 0.879 | 0.563 | 0.083 | 0.144 | 0.855 | 0.652 | 0.035 | 0.781 | 0.127 | 0.684 | 0.718 | 0.365 | 0.883 | 0.024 | 0.803 | 0.947 | 0.481 | 0.373 | 0.454 |
| II | CGCGAA | 0.237 | 0.467 | 0.266 | 0.038 | 0.640 | 0.173 | 0.166 | 0.005 | 0.056 | 0.043 | 0.220 | 0.242 | 0.277 | 0.016 | 0.348 | 0.076 | 0.252 | 0.475 | 0.239 | 0.489 | 0.160 | 0.281 | 0.131 | 0.173 | 0.053 | 0.155 |
| II | CCCGAT | 0.239 | 0.600 | 0.452 | 0.352 | 0.771 | 0.310 | 0.555 | 0.757 | 0.227 | 0.257 | 0.019 | 0.875 | 0.224 | 0.091 | 0.310 | 0.028 | 0.566 | 0.438 | 0.337 | 0.592 | 0.128 | 0.070 | 0.918 | 0.275 | 0.220 | 0.224 |
| II | GCGTGG | 0.654 | 0.440 | 0.619 | 0.010 | 0.784 | 0.573 | 0.378 | 0.369 | 0.266 | 0.041 | 0.222 | 0.440 | 0.250 | 0.091 | 0.302 | 0.031 | 0.026 | 0.469 | 0.093 | 0.755 | 0.157 | 0.032 | 0.844 | 0.046 | 0.007 | 0.002 |
| II | AGGCCG | 0.910 | 0.812 | 0.790 | 0.401 | 0.834 | 0.299 | 0.654 | 0.913 | 0.719 | 0.020 | 0.260 | 0.844 | 0.603 | 0.125 | 0.910 | 0.484 | 0.776 | 0.893 | 0.194 | 0.861 | 0.001 | 0.614 | 0.573 | 0.574 | 0.331 | 0.609 |
| II | ACCCGG | 0.759 | 0.758 | 0.518 | 0.073 | 0.910 | 0.414 | 0.364 | 0.008 | 0.033 | 0.032 | 0.370 | 0.663 | 0.102 | 0.015 | 0.063 | 0.044 | 0.265 | 0.554 | 0.159 | 0.780 | 0.084 | 0.064 | 0.777 | 0.136 | 0.024 | 0.184 |
| II | GCCGTA | 0.567 | 0.678 | 0.451 | 0.132 | 0.764 | 0.480 | 0.503 | 0.601 | 0.341 | 0.006 | 0.208 | 0.012 | 0.430 | 0.050 | 0.581 | 0.146 | 0.073 | 0.709 | 0.004 | 0.385 | 0.019 | 0.482 | 0.505 | 0.167 | 0.036 | 0.132 |
| II | TTCCGG | 0.281 | 0.507 | 0.221 | 0.058 | 0.696 | 0.111 | 0.311 | 0.006 | 0.098 | 0.035 | 0.109 | 0.367 | 0.083 | 0.041 | 0.529 | 0.035 | 0.223 | 0.509 | 0.293 | 0.484 | 0.283 | 0.344 | 0.416 | 0.096 | 0.074 | 0.054 |
| II | CTGACG | 0.528 | 0.464 | 0.197 | 0.290 | 0.700 | 0.600 | 0.452 | 0.566 | 0.487 | 0.051 | 0.208 | 0.398 | 0.025 | 0.322 | 0.277 | 0.173 | 0.073 | 0.371 | 0.334 | 0.402 | 0.184 | 0.152 | 0.042 | 0.036 | 0.142 | 0.002 |
| II | GCGACG | 0.722 | 0.399 | 0.725 | 0.101 | 0.611 | 0.345 | 0.522 | 0.430 | 0.301 | 0.018 | 0.121 | 0.721 | 0.126 | 0.129 | 0.293 | 0.239 | 0.128 | 0.197 | 0.207 | 0.598 | 0.034 | 0.321 | 0.561 | 0.021 | 0.081 | 0.099 |
| II | GACGGG | 0.587 | 0.747 | 0.704 | 0.113 | 0.678 | 0.426 | 0.528 | 0.882 | 0.460 | 0.095 | 0.141 | 0.945 | 0.056 | 0.024 | 0.382 | 0.128 | 0.163 | 0.663 | 0.182 | 0.706 | 0.067 | 0.031 | 0.933 | 0.109 | 0.077 | 0.187 |
| II | GTGGCG | 0.682 | 0.727 | 0.129 | 0.043 | 0.882 | 0.721 | 0.258 | 0.121 | 0.182 | 0.010 | 0.366 | 0.579 | 0.603 | 0.069 | 0.720 | 0.070 | 0.243 | 0.208 | 0.252 | 0.758 | 0.036 | 0.167 | 0.743 | 0.476 | 0.025 | 0.004 |
| II | AAGGCG | 0.435 | 0.751 | 0.837 | 0.487 | 0.651 | 0.349 | 0.105 | 0.751 | 0.758 | 0.037 | 0.324 | 0.808 | 0.514 | 0.122 | 0.744 | 0.156 | 0.547 | 0.754 | 0.610 | 0.753 | 0.123 | 0.585 | 0.921 | 0.120 | 0.363 | 0.232 |
| II | CGAGCC | 0.800 | 0.875 | 0.353 | 0.384 | 0.899 | 0.585 | 0.646 | 0.875 | 0.793 | 0.071 | 0.647 | 0.873 | 0.788 | 0.565 | 0.755 | 0.551 | 0.814 | 0.868 | 0.428 | 0.918 | 0.084 | 0.453 | 0.887 | 0.641 | 0.058 | 0.514 |
| II | GGTCGG | 0.624 | 0.008 | 0.617 | 0.323 | 0.941 | 0.669 | 0.301 | 0.954 | 0.866 | 0.001 | 0.156 | 0.914 | 0.100 | 0.241 | 0.516 | 0.020 | 0.101 | 0.907 | 0.180 | 0.966 | 0.021 | 0.467 | 0.976 | 0.077 | 0.546 | 0.761 |
| II | GTGGCC | 0.878 | 0.843 | 0.142 | 0.146 | 0.885 | 0.284 | 0.473 | 0.838 | 0.592 | 0.019 | 0.505 | 0.796 | 0.455 | 0.535 | 0.614 | 0.218 | 0.442 | 0.283 | 0.615 | 0.720 | 0.006 | 0.013 | 0.862 | 0.516 | 0.010 | 0.013 |
| II | AGCGGC | 0.742 | 0.830 | 0.183 | 0.637 | 0.726 | 0.639 | 0.602 | 0.818 | 0.665 | 0.006 | 0.735 | 0.830 | 0.375 | 0.064 | 0.885 | 0.423 | 0.509 | 0.353 | 0.402 | 0.758 | 0.026 | 0.658 | 0.513 | 0.252 | 0.237 | 0.379 |
| II | AAACCG | 0.214 | 0.217 | 0.261 | 0.028 | 0.424 | 0.039 | 0.210 | 0.348 | 0.372 | 0.021 | 0.185 | 0.197 | 0.030 | 0.047 | 0.053 | 0.006 | 0.274 | 0.381 | 0.230 | 0.536 | 0.026 | 0.181 | 0.706 | 0.164 | 0.270 | 0.291 |
| II | TTCCGG | 0.219 | 0.575 | 0.284 | 0.410 | 0.651 | 0.093 | 0.529 | 0.697 | 0.231 | 0.162 | 0.333 | 0.214 | 0.159 | 0.099 | 0.607 | 0.069 | 0.304 | 0.559 | 0.407 | 0.382 | 0.095 | 0.104 | 0.789 | 0.259 | 0.368 | 0.360 |
| II | GGCGGT | 0.556 | 0.511 | 0.441 | 0.157 | 0.847 | 0.198 | 0.317 | 0.082 | 0.074 | 0.001 | 0.128 | 0.313 | 0.075 | 0.048 | 0.053 | 0.124 | 0.287 | 0.583 | 0.101 | 0.509 | 0.016 | 0.182 | 0.786 | 0.069 | 0.137 | 0.230 |
| II | CCGCCA | 0.680 | 0.486 | 0.314 | 0.163 | 0.820 | 0.225 | 0.526 | 0.003 | 0.258 | 0.002 | 0.328 | 0.545 | 0.148 | 0.045 | 0.445 | 0.109 | 0.358 | 0.435 | 0.305 | 0.799 | 0.014 | 0.076 | 0.838 | 0.029 | 0.117 | 0.033 |
| II | TGGCGG | 0.639 | 0.488 | 0.441 | 0.078 | 0.900 | 0.474 | 0.652 | 0.008 | 0.153 | 0.002 | 0.173 | 0.662 | 0.109 | 0.019 | 0.326 | 0.074 | 0.292 | 0.430 | 0.327 | 0.686 | 0.012 | 0.042 | 0.870 | 0.075 | 0.056 | 0.148 |
| II | CCGGAG | 0.889 | 0.924 | 0.632 | 0.081 | 0.934 | 0.688 | 0.791 | 0.930 | 0.435 | 0.110 | 0.258 | 0.812 | 0.477 | 0.005 | 0.661 | 0.117 | 0.366 | 0.880 | 0.293 | 0.929 | 0.005 | 0.207 | 0.971 | 0.166 | 0.743 | 0.473 |
| II | CCGACC | 0.863 | 0.004 | 0.484 | 0.276 | 0.987 | 0.643 | 0.747 | 0.950 | 0.631 | 0.000 | 0.185 | 0.963 | 0.158 | 0.353 | 0.104 | 0.011 | 0.244 | 0.905 | 0.426 | 0.937 | 0.028 | 0.186 | 0.853 | 0.082 | 0.048 | 0.362 |
| II | CCGGCT | 0.730 | 0.608 | 0.417 | 0.582 | 0.848 | 0.788 | 0.539 | 0.919 | 0.831 | 0.005 | 0.664 | 0.581 | 0.408 | 0.050 | 0.683 | 0.189 | 0.445 | 0.872 | 0.635 | 0.814 | 0.008 | 0.180 | 0.907 | 0.340 | 0.079 | 0.546 |
| II | ACGTGT | 0.364 | 0.260 | 0.317 | 0.005 | 0.477 | 0.370 | 0.084 | 0.272 | 0.228 | 0.091 | 0.212 | 0.158 | 0.029 | 0.516 | 0.323 | 0.029 | 0.003 | 0.327 | 0.041 | 0.076 | 0.043 | 0.079 | 0.184 | 0.036 | 0.000 | 0.000 |
| II | CAGCGG | 0.749 | 0.585 | 0.142 | 0.078 | 0.930 | 0.443 | 0.695 | 0.789 | 0.364 | 0.038 | 0.706 | 0.898 | 0.174 | 0.066 | 0.721 | 0.254 | 0.555 | 0.117 | 0.334 | 0.776 | 0.106 | 0.127 | 0.382 | 0.130 | 0.152 | 0.193 |
| II | GCCGAG | 0.689 | 0.736 | 0.491 | 0.029 | 0.838 | 0.783 | 0.623 | 0.836 | 0.520 | 0.027 | 0.278 | 0.439 | 0.415 | 0.261 | 0.703 | 0.270 | 0.661 | 0.871 | 0.499 | 0.847 | 0.042 | 0.793 | 0.887 | 0.378 | 0.133 | 0.080 |
| II | CGGGAC | 0.817 | 0.487 | 0.586 | 0.074 | 0.944 |       |       |       |       |       |       |       |       |       |       |       |       |       |       |       |       |       |       |       |       |       |



|     |         |       |       |       |       |       |       |       |       |       |       |       |       |       |       |       |       |       |       |       |       |       |       |       |       |       |       |
|-----|---------|-------|-------|-------|-------|-------|-------|-------|-------|-------|-------|-------|-------|-------|-------|-------|-------|-------|-------|-------|-------|-------|-------|-------|-------|-------|-------|
| II  | CCC GTT | 0.361 | 0.515 | 0.662 | 0.351 | 0.619 | 0.112 | 0.066 | 0.818 | 0.233 | 0.099 | 0.215 | 0.376 | 0.110 | 0.097 | 0.319 | 0.060 | 0.328 | 0.354 | 0.346 | 0.409 | 0.119 | 0.086 | 0.871 | 0.095 | 0.105 | 0.525 |
| III | GCCCGG  | 0.884 | 0.877 | 0.587 | 0.450 | 0.927 | 0.790 | 0.672 | 0.903 | 0.340 | 0.014 | 0.669 | 0.920 | 0.325 | 0.004 | 0.433 | 0.095 | 0.736 | 0.844 | 0.176 | 0.933 | 0.002 | 0.028 | 0.901 | 0.272 | 0.153 | 0.257 |
| III | TAACCG  | 0.165 | 0.222 | 0.156 | 0.088 | 0.389 | 0.249 | 0.112 | 0.146 | 0.183 | 0.009 | 0.201 | 0.160 | 0.036 | 0.126 | 0.002 | 0.000 | 0.093 | 0.293 | 0.237 | 0.175 | 0.034 | 0.186 | 0.702 | 0.125 | 0.077 | 0.046 |
| III | GAGGCC  | 0.941 | 0.879 | 0.725 | 0.406 | 0.798 | 0.560 | 0.591 | 0.926 | 0.788 | 0.042 | 0.758 | 0.942 | 0.781 | 0.344 | 0.928 | 0.500 | 0.890 | 0.897 | 0.828 | 0.859 | 0.022 | 0.134 | 0.263 | 0.578 | 0.642 | 0.767 |
| III | AAGGGC  | 0.755 | 0.893 | 0.738 | 0.918 | 0.572 | 0.441 | 0.097 | 0.923 | 0.856 | 0.139 | 0.544 | 0.913 | 0.432 | 0.467 | 0.731 | 0.004 | 0.823 | 0.913 | 0.579 | 0.875 | 0.069 | 0.191 | 0.870 | 0.635 | 0.583 | 0.806 |
| III | CCCATT  | 0.274 | 0.478 | 0.579 | 0.497 | 0.646 | 0.181 | 0.468 | 0.661 | 0.312 | 0.067 | 0.163 | 0.649 | 0.188 | 0.163 | 0.251 | 0.184 | 0.406 | 0.272 | 0.498 | 0.552 | 0.133 | 0.019 | 0.533 | 0.062 | 0.079 | 0.027 |
| III | GGTCCA  | 0.745 | 0.450 | 0.289 | 0.426 | 0.806 | 0.573 | 0.413 | 0.813 | 0.316 | 0.161 | 0.273 | 0.773 | 0.082 | 0.392 | 0.105 | 0.267 | 0.009 | 0.417 | 0.582 | 0.748 | 0.054 | 0.003 | 0.688 | 0.006 | 0.058 | 0.072 |
| III | AGTGGG  | 0.599 | 0.784 | 0.014 | 0.328 | 0.788 | 0.588 | 0.303 | 0.861 | 0.529 | 0.168 | 0.235 | 0.599 | 0.269 | 0.526 | 0.452 | 0.140 | 0.630 | 0.657 | 0.595 | 0.655 | 0.219 | 0.006 | 0.706 | 0.325 | 0.384 | 0.289 |
| III | AACGAC  | 0.280 | 0.083 | 0.361 | 0.083 | 0.282 | 0.265 | 0.011 | 0.273 | 0.327 | 0.049 | 0.163 | 0.277 | 0.036 | 0.327 | 0.121 | 0.010 | 0.052 | 0.146 | 0.177 | 0.239 | 0.060 | 0.214 | 0.216 | 0.018 | 0.012 | 0.086 |
| III | TATCGG  | 0.179 | 0.127 | 0.282 | 0.241 | 0.161 | 0.050 | 0.101 | 0.098 | 0.137 | 0.029 | 0.059 | 0.529 | 0.038 | 0.095 | 0.034 | 0.013 | 0.120 | 0.146 | 0.094 | 0.205 | 0.010 | 0.027 | 0.681 | 0.142 | 0.039 | 0.105 |
| III | CCGAAT  | 0.132 | 0.281 | 0.404 | 0.071 | 0.397 | 0.067 | 0.284 | 0.177 | 0.014 | 0.027 | 0.057 | 0.048 | 0.049 | 0.150 | 0.336 | 0.007 | 0.198 | 0.253 | 0.157 | 0.286 | 0.117 | 0.120 | 0.697 | 0.092 | 0.016 | 0.080 |
| III | AAAGCC  | 0.395 | 0.548 | 0.163 | 0.788 | 0.239 | 0.133 | 0.015 | 0.753 | 0.718 | 0.115 | 0.434 | 0.593 | 0.320 | 0.739 | 0.740 | 0.370 | 0.483 | 0.543 | 0.727 | 0.329 | 0.492 | 0.712 | 0.616 | 0.164 | 0.195 | 0.271 |
| III | TCCGAA  | 0.263 | 0.388 | 0.068 | 0.071 | 0.331 | 0.092 | 0.062 | 0.363 | 0.106 | 0.285 | 0.169 | 0.275 | 0.368 | 0.121 | 0.455 | 0.044 | 0.373 | 0.413 | 0.392 | 0.516 | 0.100 | 0.441 | 0.449 | 0.217 | 0.224 | 0.430 |
| III | GGGGTC  | 0.621 | 0.988 | 0.714 | 0.513 | 0.976 | 0.509 | 0.860 | 0.993 | 0.571 | 0.212 | 0.135 | 0.982 | 0.100 | 0.075 | 0.125 | 0.497 | 0.069 | 0.973 | 0.494 | 0.959 | 0.429 | 0.017 | 0.970 | 0.012 | 0.189 | 0.140 |
| III | TCCGAC  | 0.453 | 0.009 | 0.425 | 0.085 | 0.761 | 0.321 | 0.508 | 0.606 | 0.479 | 0.007 | 0.135 | 0.673 | 0.063 | 0.303 | 0.242 | 0.101 | 0.179 | 0.313 | 0.328 | 0.686 | 0.002 | 0.401 | 0.574 | 0.099 | 0.233 | 0.127 |
| III | ATTGGG  | 0.086 | 0.194 | 0.571 | 0.080 | 0.518 | 0.046 | 0.511 | 0.149 | 0.022 | 0.038 | 0.119 | 0.046 | 0.113 | 0.126 | 0.420 | 0.010 | 0.316 | 0.371 | 0.130 | 0.342 | 0.093 | 0.132 | 0.570 | 0.165 | 0.156 | 0.135 |
| III | CCAACG  | 0.803 | 0.533 | 0.710 | 0.149 | 0.762 | 0.648 | 0.041 | 0.371 | 0.528 | 0.042 | 0.293 | 0.822 | 0.111 | 0.490 | 0.183 | 0.015 | 0.288 | 0.064 | 0.415 | 0.760 | 0.199 | 0.186 | 0.909 | 0.106 | 0.161 | 0.181 |
| III | TGCTTT  | 0.199 | 0.531 | 0.035 | 0.599 | 0.267 | 0.083 | 0.011 | 0.339 | 0.409 | 0.095 | 0.380 | 0.411 | 0.120 | 0.705 | 0.631 | 0.369 | 0.368 | 0.474 | 0.637 | 0.266 | 0.489 | 0.438 | 0.759 | 0.054 | 0.019 | 0.323 |
| III | GACCCA  | 0.842 | 0.577 | 0.206 | 0.436 | 0.809 | 0.527 | 0.361 | 0.760 | 0.655 | 0.131 | 0.106 | 0.406 | 0.097 | 0.669 | 0.093 | 0.113 | 0.036 | 0.331 | 0.213 | 0.610 | 0.092 | 0.008 | 0.647 | 0.016 | 0.126 | 0.229 |
| III | TTTGGG  | 0.217 | 0.087 | 0.410 | 0.348 | 0.318 | 0.041 | 0.137 | 0.199 | 0.058 | 0.021 | 0.039 | 0.007 | 0.025 | 0.217 | 0.428 | 0.068 | 0.045 | 0.158 | 0.251 | 0.459 | 0.051 | 0.035 | 0.471 | 0.122 | 0.020 | 0.024 |
| III | AATCCG  | 0.133 | 0.308 | 0.621 | 0.079 | 0.501 | 0.076 | 0.347 | 0.258 | 0.135 | 0.140 | 0.039 | 0.272 | 0.106 | 0.023 | 0.344 | 0.009 | 0.270 | 0.420 | 0.172 | 0.364 | 0.068 | 0.348 | 0.716 | 0.180 | 0.308 | 0.191 |
| III | AAAGGC  | 0.327 | 0.777 | 0.812 | 0.614 | 0.357 | 0.194 | 0.009 | 0.802 | 0.745 | 0.118 | 0.675 | 0.648 | 0.252 | 0.601 | 0.818 | 0.385 | 0.526 | 0.758 | 0.625 | 0.580 | 0.272 | 0.425 | 0.619 | 0.404 | 0.203 | 0.494 |
| III | CCGACA  | 0.619 | 0.000 | 0.382 | 0.105 | 0.632 | 0.371 | 0.403 | 0.429 | 0.175 | 0.000 | 0.208 | 0.451 | 0.052 | 0.127 | 0.459 | 0.055 | 0.334 | 0.046 | 0.165 | 0.598 | 0.013 | 0.200 | 0.487 | 0.240 | 0.023 | 0.038 |
| III | GTGGAC  | 0.442 | 0.499 | 0.049 | 0.080 | 0.584 | 0.489 | 0.128 | 0.613 | 0.314 | 0.091 | 0.396 | 0.456 | 0.094 | 0.253 | 0.215 | 0.316 | 0.035 | 0.401 | 0.293 | 0.528 | 0.142 | 0.006 | 0.678 | 0.007 | 0.079 | 0.006 |
| III | GTCCAG  | 0.682 | 0.653 | 0.205 | 0.389 | 0.555 | 0.711 | 0.253 | 0.660 | 0.278 | 0.049 | 0.158 | 0.716 | 0.072 | 0.675 | 0.546 | 0.345 | 0.035 | 0.635 | 0.452 | 0.655 | 0.032 | 0.084 | 0.134 | 0.006 | 0.103 | 0.023 |
| III | GATGGG  | 0.491 | 0.532 | 0.320 | 0.593 | 0.725 | 0.131 | 0.422 | 0.852 | 0.412 | 0.099 | 0.024 | 0.874 | 0.186 | 0.471 | 0.339 | 0.034 | 0.294 | 0.375 | 0.473 | 0.504 | 0.206 | 0.009 | 0.888 | 0.460 | 0.054 | 0.043 |
| III | ATCCGA  | 0.327 | 0.154 | 0.230 | 0.092 | 0.258 | 0.182 | 0.180 | 0.260 | 0.159 | 0.176 | 0.020 | 0.298 | 0.147 | 0.279 | 0.333 | 0.007 | 0.161 | 0.184 | 0.233 | 0.353 | 0.046 | 0.289 | 0.536 | 0.186 | 0.014 | 0.073 |
| III | CCGAGA  | 0.482 | 0.723 | 0.425 | 0.368 | 0.631 | 0.538 | 0.569 | 0.722 | 0.325 | 0.061 | 0.133 | 0.648 | 0.361 | 0.203 | 0.621 | 0.101 | 0.155 | 0.709 | 0.662 | 0.630 | 0.145 | 0.300 | 0.888 | 0.136 | 0.252 | 0.458 |
| III | CCGTAA  | 0.169 | 0.278 | 0.334 | 0.108 | 0.382 | 0.200 | 0.126 | 0.137 | 0.115 | 0.050 | 0.244 | 0.117 | 0.131 | 0.023 | 0.093 | 0.084 | 0.018 | 0.267 | 0.014 | 0.330 | 0.105 | 0.175 | 0.499 | 0.213 | 0.241 | 0.161 |
| III | CCAATA  | 0.144 | 0.105 | 0.410 | 0.323 | 0.241 | 0.104 | 0.123 | 0.065 | 0.267 | 0.075 | 0.076 | 0.218 | 0.029 | 0.252 | 0.206 | 0.060 | 0.034 | 0.200 | 0.098 | 0.214 | 0.163 | 0.023 | 0.427 | 0.050 | 0.046 | 0.103 |
| III | GAGTGG  | 0.711 | 0.708 | 0.010 | 0.055 | 0.580 | 0.586 | 0.172 | 0.762 | 0.490 | 0.071 | 0.391 | 0.771 | 0.264 | 0.347 | 0.174 | 0.167 | 0.427 | 0.469 | 0.364 | 0.815 | 0.394 | 0.015 | 0.668 | 0.268 | 0.218 | 0.116 |
| III | ACGAGG  | 0.648 | 0.609 | 0.777 | 0.119 | 0.714 | 0.658 | 0.310 | 0.708 | 0.642 | 0.243 | 0.525 | 0.712 | 0.542 | 0.318 | 0.500 | 0.157 | 0.492 | 0.698 | 0.161 | 0.570 | 0.311 | 0.256 | 0.464 | 0.199 | 0.023 | 0.114 |
| III | GGCTCA  | 0.747 | 0.841 | 0.192 | 0.577 | 0.785 | 0.752 | 0.386 | 0.761 | 0.845 | 0.115 | 0.674 | 0.843 | 0.397 | 0.639 | 0.579 | 0.307 | 0.782 | 0.693 | 0.684 | 0.830 | 0.324 | 0.483 | 0.838 | 0.477 | 0.303 | 0.662 |
| III | GCTGAG  | 0.704 | 0.797 | 0.140 | 0.548 | 0.781 | 0.740 | 0.461 | 0.791 | 0.742 | 0.065 | 0.355 | 0.583 | 0.421 | 0.529 | 0.686 | 0.164 | 0.512 | 0.433 | 0.326 | 0.860 | 0.397 | 0.422 | 0.310 | 0.069 | 0.549 | 0.188 |
| III | GGCTAA  | 0.283 | 0.554 | 0.327 | 0.678 | 0.523 | 0.255 | 0.144 | 0.651 | 0.652 | 0.071 | 0.365 | 0.389 | 0.431 | 0.464 | 0.119 | 0.073 | 0.308 | 0.450 | 0.535 | 0.472 | 0.158 | 0.355 | 0.521 | 0.419 | 0.354 | 0.386 |
| III | ACCGAT  | 0.345 | 0.305 | 0.277 | 0.086 | 0.379 | 0.214 | 0.186 | 0.202 | 0.262 | 0.013 | 0.010 | 0.324 | 0.051 | 0.134 | 0.039 | 0.028 | 0.063 | 0.302 | 0.073 | 0.276 | 0.025 | 0.164 | 0.607 | 0.043 | 0.101 | 0.097 |
| III | TGCCAG  | 0.332 | 0.617 | 0.202 | 0.411 | 0.666 | 0.423 | 0.416 | 0.647 | 0.444 | 0.050 | 0.136 | 0.652 | 0.396 | 0.571 | 0.530 | 0.102 | 0.357 | 0.430 | 0.353 | 0.537 | 0.122 | 0.514 | 0.013 | 0.107 | 0.150 | 0.000 |
| III | GCCAGA  | 0.451 | 0.719 | 0.272 | 0.658 | 0.757 | 0.521 | 0.407 | 0.703 | 0.551 | 0.056 | 0.153 | 0.482 | 0.370 | 0.686 | 0.807 | 0.069 | 0.564 | 0.510 | 0.221 | 0.633 | 0.097 | 0.376 | 0.038 | 0.334 | 0.118 | 0.016 |
| III | TGGGGT  | 0.303 | 0.425 | 0.230 | 0.175 | 0.629 | 0.105 | 0.310 | 0.736 | 0.073 | 0.010 | 0.010 | 0.284 | 0.030 | 0.229 | 0.023 | 0.038 | 0.004 | 0.065 | 0.064 | 0.392 | 0.214 | 0.007 | 0.449 | 0.052 | 0.000 | 0.035 |
| III | TGTGGC  | 0.481 | 0.238 | 0.115 | 0.265 | 0.604 | 0.285 | 0.240 | 0.388 | 0.208 | 0.023 | 0.260 | 0.659 | 0.210 | 0.239 | 0.295 | 0.029 | 0.187 | 0.003 | 0.344 | 0.545 | 0.068 | 0.042 | 0.212 | 0.382 | 0.003 | 0.007 |
| III | AAGTGG  | 0.458 | 0.442 | 0.021 | 0.577 | 0.415 | 0.291 | 0.042 | 0.683 | 0.328 | 0.256 | 0.488 | 0.440 | 0.286 | 0.446 | 0.357 | 0.287 | 0.229 | 0.418 | 0.504 | 0.476 | 0.347 | 0.021 | 0.457 | 0.214 | 0.204 | 0.115 |
| III | TAAACG  | 0.096 | 0.133 | 0.305 | 0.066 | 0.259 | 0.068 | 0.014 | 0.301 | 0.092 | 0.067 | 0.148 | 0.086 | 0.034 | 0.151 | 0.106 | 0.026 | 0.078 | 0.059 | 0.066 | 0.052 | 0.190 | 0.124 | 0.609 | 0.089 | 0.023 | 0.023 |
| III | TAATCG  | 0.067 | 0.020 | 0.483 | 0.155 | 0.122 | 0.042 | 0.117 | 0.020 | 0.045 | 0.034 | 0.014 | 0.143 | 0.011 | 0.301 | 0.056 | 0.017 | 0.052 | 0.050 | 0.080 | 0.018 | 0.029 | 0.109 | 0.291 | 0.045 | 0.017 | 0.006 |
| III | ATCGAA  | 0.171 | 0.270 | 0.106 | 0.362 | 0.286 | 0.074 | 0.113 | 0.266 | 0.142 | 0.167 | 0.022 | 0.274 | 0.126 | 0.571 | 0.355 | 0.037 | 0.197 | 0.259 | 0.245 | 0.093 | 0.368 | 0.291 | 0.473 | 0.221 | 0.218 | 0.248 |
| III | AAATGG  | 0.081 | 0.272 | 0.758 | 0.510 | 0.394 | 0.03  |       |       |       |       |       |       |       |       |       |       |       |       |       |       |       |       |       |       |       |       |

|     |        |       |       |       |       |       |       |       |       |       |       |       |       |       |       |       |       |       |       |       |       |       |       |       |       |       |       |
|-----|--------|-------|-------|-------|-------|-------|-------|-------|-------|-------|-------|-------|-------|-------|-------|-------|-------|-------|-------|-------|-------|-------|-------|-------|-------|-------|-------|
| III | ATAAGG | 0.149 | 0.215 | 0.411 | 0.741 | 0.103 | 0.324 | 0.184 | 0.485 | 0.413 | 0.091 | 0.180 | 0.314 | 0.078 | 0.280 | 0.417 | 0.023 | 0.112 | 0.218 | 0.211 | 0.092 | 0.264 | 0.048 | 0.498 | 0.236 | 0.034 | 0.018 |
| III | CCACAG | 0.785 | 0.508 | 0.060 | 0.651 | 0.833 | 0.557 | 0.455 | 0.806 | 0.501 | 0.044 | 0.168 | 0.796 | 0.450 | 0.841 | 0.075 | 0.134 | 0.292 | 0.011 | 0.419 | 0.767 | 0.136 | 0.013 | 0.265 | 0.214 | 0.083 | 0.333 |
| III | AAATCC | 0.051 | 0.515 | 0.588 | 0.428 | 0.293 | 0.030 | 0.282 | 0.383 | 0.296 | 0.185 | 0.031 | 0.141 | 0.217 | 0.168 | 0.401 | 0.006 | 0.303 | 0.326 | 0.473 | 0.417 | 0.467 | 0.558 | 0.548 | 0.200 | 0.215 | 0.208 |
| III | ATCCAA | 0.207 | 0.306 | 0.193 | 0.484 | 0.370 | 0.086 | 0.209 | 0.143 | 0.061 | 0.119 | 0.020 | 0.207 | 0.057 | 0.705 | 0.323 | 0.009 | 0.073 | 0.127 | 0.165 | 0.313 | 0.327 | 0.150 | 0.360 | 0.205 | 0.112 | 0.087 |
| III | AGTGGA | 0.458 | 0.424 | 0.007 | 0.299 | 0.553 | 0.471 | 0.083 | 0.429 | 0.314 | 0.390 | 0.235 | 0.664 | 0.258 | 0.699 | 0.460 | 0.165 | 0.309 | 0.384 | 0.402 | 0.521 | 0.375 | 0.082 | 0.337 | 0.102 | 0.352 | 0.131 |
| III | ATGCCA | 0.444 | 0.332 | 0.355 | 0.500 | 0.674 | 0.390 | 0.347 | 0.443 | 0.370 | 0.108 | 0.200 | 0.647 | 0.320 | 0.483 | 0.563 | 0.049 | 0.301 | 0.139 | 0.329 | 0.455 | 0.126 | 0.405 | 0.514 | 0.505 | 0.098 | 0.008 |
| III | CATACG | 0.297 | 0.273 | 0.517 | 0.025 | 0.525 | 0.263 | 0.210 | 0.202 | 0.081 | 0.045 | 0.088 | 0.293 | 0.143 | 0.216 | 0.240 | 0.047 | 0.045 | 0.089 | 0.020 | 0.121 | 0.184 | 0.077 | 0.663 | 0.091 | 0.009 | 0.015 |
| III | TTATCC | 0.088 | 0.063 | 0.338 | 0.225 | 0.145 | 0.087 | 0.031 | 0.065 | 0.188 | 0.033 | 0.073 | 0.214 | 0.043 | 0.107 | 0.184 | 0.000 | 0.021 | 0.099 | 0.035 | 0.086 | 0.088 | 0.042 | 0.277 | 0.081 | 0.081 | 0.044 |
| III | GTCCAT | 0.485 | 0.402 | 0.295 | 0.432 | 0.530 | 0.428 | 0.104 | 0.554 | 0.264 | 0.071 | 0.172 | 0.645 | 0.062 | 0.668 | 0.407 | 0.084 | 0.049 | 0.381 | 0.217 | 0.636 | 0.096 | 0.067 | 0.767 | 0.046 | 0.010 | 0.057 |
| III | TATCCA | 0.148 | 0.339 | 0.267 | 0.285 | 0.351 | 0.126 | 0.153 | 0.236 | 0.166 | 0.139 | 0.115 | 0.426 | 0.169 | 0.434 | 0.256 | 0.000 | 0.157 | 0.142 | 0.126 | 0.296 | 0.359 | 0.154 | 0.158 | 0.144 | 0.059 | 0.121 |
| III | GATAAG | 0.242 | 0.058 | 0.068 | 0.178 | 0.085 | 0.086 | 0.110 | 0.144 | 0.156 | 0.030 | 0.082 | 0.066 | 0.067 | 0.076 | 0.130 | 0.000 | 0.039 | 0.153 | 0.120 | 0.052 | 0.086 | 0.088 | 0.096 | 0.054 | 0.088 | 0.036 |
| III | ATGTGG | 0.305 | 0.102 | 0.177 | 0.233 | 0.441 | 0.121 | 0.088 | 0.065 | 0.039 | 0.028 | 0.058 | 0.293 | 0.047 | 0.228 | 0.112 | 0.033 | 0.126 | 0.004 | 0.112 | 0.490 | 0.174 | 0.002 | 0.429 | 0.079 | 0.003 | 0.006 |
| III | ATCCTA | 0.306 | 0.321 | 0.364 | 0.507 | 0.214 | 0.156 | 0.159 | 0.307 | 0.253 | 0.318 | 0.049 | 0.410 | 0.236 | 0.754 | 0.391 | 0.026 | 0.464 | 0.345 | 0.199 | 0.304 | 0.380 | 0.289 | 0.488 | 0.113 | 0.241 | 0.141 |
| III | AAAATC | 0.015 | 0.163 | 0.525 | 0.648 | 0.022 | 0.015 | 0.109 | 0.384 | 0.103 | 0.096 | 0.060 | 0.049 | 0.051 | 0.356 | 0.201 | 0.002 | 0.109 | 0.074 | 0.342 | 0.128 | 0.086 | 0.187 | 0.274 | 0.092 | 0.044 | 0.090 |
| III | AATTGA | 0.051 | 0.038 | 0.445 | 0.380 | 0.239 | 0.016 | 0.193 | 0.107 | 0.062 | 0.052 | 0.074 | 0.057 | 0.006 | 0.568 | 0.115 | 0.091 | 0.064 | 0.134 | 0.189 | 0.096 | 0.321 | 0.128 | 0.321 | 0.010 | 0.048 | 0.040 |
| III | AGAGTG | 0.450 | 0.413 | 0.002 | 0.303 | 0.194 | 0.458 | 0.182 | 0.364 | 0.454 | 0.216 | 0.225 | 0.526 | 0.220 | 0.400 | 0.288 | 0.210 | 0.184 | 0.220 | 0.473 | 0.523 | 0.567 | 0.133 | 0.358 | 0.304 | 0.079 | 0.181 |
| III | ATCAGA | 0.209 | 0.203 | 0.161 | 0.217 | 0.231 | 0.173 | 0.104 | 0.200 | 0.188 | 0.115 | 0.011 | 0.289 | 0.024 | 0.586 | 0.281 | 0.025 | 0.218 | 0.028 | 0.203 | 0.097 | 0.050 | 0.083 | 0.036 | 0.080 | 0.046 | 0.072 |
| III | TCAGAA | 0.177 | 0.169 | 0.105 | 0.238 | 0.079 | 0.073 | 0.099 | 0.308 | 0.046 | 0.085 | 0.084 | 0.176 | 0.092 | 0.719 | 0.264 | 0.075 | 0.138 | 0.124 | 0.295 | 0.260 | 0.046 | 0.161 | 0.009 | 0.059 | 0.133 | 0.115 |
| III | ATTAAG | 0.008 | 0.041 | 0.275 | 0.282 | 0.027 | 0.010 | 0.020 | 0.193 | 0.022 | 0.023 | 0.079 | 0.020 | 0.002 | 0.803 | 0.088 | 0.055 | 0.029 | 0.040 | 0.161 | 0.011 | 0.153 | 0.067 | 0.217 | 0.041 | 0.018 | 0.025 |
| III | AAAATG | 0.020 | 0.063 | 0.445 | 0.667 | 0.020 | 0.027 | 0.052 | 0.191 | 0.010 | 0.061 | 0.174 | 0.031 | 0.036 | 0.233 | 0.150 | 0.103 | 0.048 | 0.108 | 0.073 | 0.122 | 0.266 | 0.065 | 0.271 | 0.061 | 0.027 | 0.086 |
| III | CTTATC | 0.252 | 0.101 | 0.072 | 0.149 | 0.147 | 0.154 | 0.139 | 0.254 | 0.346 | 0.082 | 0.057 | 0.238 | 0.069 | 0.088 | 0.249 | 0.000 | 0.060 | 0.111 | 0.142 | 0.061 | 0.090 | 0.104 | 0.240 | 0.095 | 0.113 | 0.064 |

**Supplemental Table S9. The sequence similarity distance (1-Pearson's correlation coefficients) of pair-wise comparisons between 6-mer sequences and known TFBSs in Franco-Zorrilla et al., 2014**

| Type | Motif  | MYB-R2R3 | Myb-related | GARP-ARR-B | GARP-G2 | Trihelix | ERF   | DREB  | AP2   | HD-WUS-like | HD-ZIP | SBP-SPL | WRKY  | C2H2  | C2C2-GATA | C2C2-YABBY | C2C2-DOF | TCP   | HSF   | bZIP  | B3-ARF | B3-REM | NAC   | ATHook_AHL | bHLH  | LOBAS2 | SRS   |
|------|--------|----------|-------------|------------|---------|----------|-------|-------|-------|-------------|--------|---------|-------|-------|-----------|------------|----------|-------|-------|-------|--------|--------|-------|------------|-------|--------|-------|
| I    | GGGCCG | 0.710    | 0.990       | 0.698      | 0.838   | 0.690    | 0.324 | 0.410 | 0.763 | 1.055       | 1.037  | 0.657   | 0.557 | 0.716 | 0.760     | 1.035      | 0.883    | 0.293 | 0.795 | 0.552 | 0.615  | 0.760  | 0.675 | 1.397      | 0.720 | 0.810  | 0.890 |
| I    | GGGCC  | 0.897    | 1.058       | 0.770      | 0.876   | 0.900    | 0.530 | 0.615 | 0.877 | 1.130       | 1.233  | 0.873   | 0.685 | 0.726 | 0.800     | 1.135      | 0.977    | 0.070 | 0.855 | 0.777 | 0.830  | 0.890  | 0.888 | 1.411      | 0.940 | 0.870  | 0.965 |
| I    | GGGCCT | 0.726    | 0.853       | 0.668      | 0.736   | 0.880    | 0.508 | 0.589 | 0.698 | 0.935       | 1.013  | 0.727   | 0.655 | 0.800 | 0.630     | 0.925      | 0.840    | 0.283 | 0.845 | 0.677 | 0.805  | 0.875  | 0.748 | 1.207      | 0.890 | 0.710  | 0.905 |
| I    | TGGGCC | 0.722    | 0.973       | 0.818      | 0.784   | 0.700    | 0.532 | 0.482 | 0.752 | 0.985       | 1.010  | 0.713   | 0.462 | 0.758 | 0.650     | 0.925      | 0.897    | 0.070 | 0.790 | 0.790 | 0.645  | 0.765  | 0.772 | 1.202      | 0.710 | 0.850  | 0.740 |
| I    | GGCCCA | 0.722    | 0.973       | 0.818      | 0.784   | 0.700    | 0.532 | 0.482 | 0.752 | 0.985       | 1.010  | 0.713   | 0.462 | 0.758 | 0.650     | 0.925      | 0.897    | 0.070 | 0.790 | 0.790 | 0.645  | 0.770  | 0.772 | 1.202      | 0.710 | 0.850  | 0.740 |
| I    | CGGCC  | 0.710    | 0.990       | 0.698      | 0.838   | 0.690    | 0.324 | 0.410 | 0.763 | 1.055       | 1.037  | 0.657   | 0.557 | 0.716 | 0.760     | 1.035      | 0.883    | 0.293 | 0.795 | 0.552 | 0.615  | 0.760  | 0.675 | 1.397      | 0.720 | 0.810  | 0.890 |
| I    | AGGCC  | 0.726    | 0.853       | 0.668      | 0.736   | 0.880    | 0.508 | 0.589 | 0.698 | 0.935       | 1.013  | 0.727   | 0.655 | 0.800 | 0.630     | 0.925      | 0.840    | 0.283 | 0.845 | 0.677 | 0.805  | 0.875  | 0.748 | 1.207      | 0.890 | 0.710  | 0.905 |
| I    | GCCCAT | 0.670    | 0.800       | 0.605      | 0.686   | 0.710    | 0.604 | 0.596 | 0.698 | 0.620       | 0.810  | 0.670   | 0.633 | 0.696 | 0.690     | 0.735      | 0.707    | 0.290 | 0.790 | 0.728 | 0.670  | 0.705  | 0.698 | 0.987      | 0.660 | 0.760  | 0.635 |
| I    | GGGCTT | 0.749    | 0.670       | 0.628      | 0.644   | 0.770    | 0.627 | 0.672 | 0.667 | 0.845       | 0.797  | 0.727   | 0.682 | 0.658 | 0.690     | 0.715      | 0.760    | 0.510 | 0.728 | 0.680 | 0.820  | 0.855  | 0.667 | 1.010      | 0.890 | 0.600  | 0.740 |
| I    | AGCCCA | 0.673    | 0.820       | 0.715      | 0.752   | 0.820    | 0.598 | 0.540 | 0.608 | 0.795       | 0.973  | 0.753   | 0.545 | 0.538 | 0.690     | 0.775      | 0.833    | 0.290 | 0.818 | 0.682 | 0.655  | 0.765  | 0.693 | 1.016      | 0.880 | 0.750  | 0.575 |
| I    | TTGGGC | 0.562    | 0.940       | 0.800      | 0.870   | 0.700    | 0.602 | 0.577 | 0.672 | 0.785       | 0.877  | 0.563   | 0.462 | 0.616 | 0.650     | 0.740      | 0.840    | 0.297 | 0.893 | 0.790 | 0.665  | 0.690  | 0.583 | 1.049      | 0.720 | 0.680  | 0.630 |
| I    | GCCCAA | 0.562    | 0.940       | 0.800      | 0.870   | 0.700    | 0.602 | 0.577 | 0.672 | 0.785       | 0.877  | 0.563   | 0.462 | 0.616 | 0.650     | 0.740      | 0.840    | 0.297 | 0.893 | 0.790 | 0.665  | 0.690  | 0.583 | 1.049      | 0.720 | 0.680  | 0.630 |
| I    | TGGCCC | 0.800    | 0.857       | 0.833      | 0.744   | 0.690    | 0.485 | 0.542 | 0.737 | 0.995       | 1.023  | 0.800   | 0.465 | 0.776 | 0.660     | 0.930      | 0.863    | 0.227 | 0.797 | 0.675 | 0.640  | 0.780  | 0.745 | 1.201      | 0.930 | 0.690  | 0.745 |
| I    | TGGGCT | 0.673    | 0.820       | 0.715      | 0.752   | 0.820    | 0.598 | 0.540 | 0.608 | 0.795       | 0.973  | 0.753   | 0.545 | 0.538 | 0.690     | 0.775      | 0.833    | 0.290 | 0.818 | 0.682 | 0.655  | 0.765  | 0.693 | 1.016      | 0.880 | 0.750  | 0.575 |
| I    | GCCCAG | 0.712    | 0.993       | 0.830      | 0.912   | 0.710    | 0.528 | 0.552 | 0.685 | 0.845       | 0.980  | 0.650   | 0.613 | 0.656 | 0.840     | 0.940      | 0.863    | 0.290 | 0.743 | 0.765 | 0.675  | 0.745  | 0.805 | 1.202      | 0.500 | 0.600  | 0.555 |
| I    | AAGCCC | 0.749    | 0.670       | 0.628      | 0.644   | 0.770    | 0.627 | 0.672 | 0.667 | 0.845       | 0.797  | 0.727   | 0.682 | 0.658 | 0.690     | 0.715      | 0.760    | 0.510 | 0.728 | 0.680 | 0.820  | 0.855  | 0.667 | 1.010      | 0.890 | 0.600  | 0.740 |
| I    | GGCCCC | 0.758    | 0.995       | 0.698      | 0.862   | 0.690    | 0.503 | 0.518 | 0.765 | 1.025       | 1.023  | 0.663   | 0.557 | 0.784 | 0.760     | 1.060      | 0.917    | 0.273 | 0.767 | 0.677 | 0.595  | 0.790  | 0.598 | 1.396      | 0.490 | 0.620  | 0.740 |
| I    | ATGGGC | 0.670    | 0.800       | 0.605      | 0.686   | 0.710    | 0.604 | 0.596 | 0.698 | 0.620       | 0.810  | 0.670   | 0.633 | 0.696 | 0.690     | 0.735      | 0.707    | 0.290 | 0.790 | 0.728 | 0.670  | 0.705  | 0.698 | 0.987      | 0.660 | 0.760  | 0.635 |
| I    | GCCACG | 0.631    | 0.807       | 0.690      | 0.900   | 0.560    | 0.482 | 0.536 | 0.585 | 0.855       | 0.820  | 0.670   | 0.445 | 0.682 | 1.000     | 0.910      | 0.790    | 0.493 | 0.720 | 0.420 | 0.680  | 0.450  | 0.460 | 1.210      | 0.050 | 0.700  | 0.640 |
| I    | CTGGGC | 0.712    | 0.993       | 0.830      | 0.912   | 0.710    | 0.528 | 0.552 | 0.685 | 0.845       | 0.980  | 0.650   | 0.613 | 0.656 | 0.840     | 0.940      | 0.863    | 0.290 | 0.743 | 0.765 | 0.675  | 0.745  | 0.805 | 1.202      | 0.500 | 0.600  | 0.555 |
| I    | GCCCAC | 0.531    | 0.998       | 0.810      | 0.910   | 0.800    | 0.458 | 0.386 | 0.688 | 0.835       | 0.993  | 0.660   | 0.490 | 0.534 | 0.740     | 0.885      | 0.797    | 0.070 | 0.830 | 0.650 | 0.445  | 0.665  | 0.730 | 1.206      | 0.720 | 0.810  | 0.645 |
| I    | GGCCTG | 0.732    | 0.812       | 0.718      | 0.752   | 0.710    | 0.612 | 0.570 | 0.707 | 0.905       | 0.800  | 0.660   | 0.680 | 0.644 | 0.590     | 0.830      | 0.823    | 0.487 | 0.743 | 0.627 | 0.675  | 0.870  | 0.565 | 1.190      | 0.670 | 0.780  | 0.625 |
| I    | GTGGGC | 0.531    | 0.998       | 0.810      | 0.910   | 0.800    | 0.458 | 0.386 | 0.688 | 0.835       | 0.993  | 0.660   | 0.490 | 0.534 | 0.740     | 0.885      | 0.797    | 0.070 | 0.830 | 0.650 | 0.445  | 0.665  | 0.730 | 1.206      | 0.720 | 0.810  | 0.645 |
| I    | TAGGCC | 0.610    | 0.792       | 0.737      | 0.630   | 0.690    | 0.627 | 0.543 | 0.602 | 0.890       | 0.853  | 0.550   | 0.465 | 0.688 | 0.480     | 0.690      | 0.813    | 0.287 | 0.688 | 0.625 | 0.640  | 0.655  | 0.620 | 0.980      | 0.890 | 0.770  | 0.520 |
| I    | GGCCTT | 0.714    | 0.673       | 0.632      | 0.726   | 0.730    | 0.567 | 0.610 | 0.687 | 0.850       | 0.777  | 0.560   | 0.665 | 0.746 | 0.690     | 0.810      | 0.603    | 0.520 | 0.750 | 0.680 | 0.850  | 0.875  | 0.700 | 1.010      | 0.890 | 0.790  | 0.735 |
| I    | AAGGCC | 0.714    | 0.673       | 0.632      | 0.726   | 0.730    | 0.567 | 0.610 | 0.687 | 0.850       | 0.777  | 0.560   | 0.665 | 0.746 | 0.690     | 0.810      | 0.603    | 0.520 | 0.750 | 0.680 | 0.850  | 0.875  | 0.700 | 1.010      | 0.890 | 0.790  | 0.735 |
| I    | GGGCCA | 0.800    | 0.857       | 0.833      | 0.744   | 0.690    | 0.485 | 0.542 | 0.737 | 0.995       | 1.023  | 0.800   | 0.465 | 0.776 | 0.660     | 0.930      | 0.863    | 0.227 | 0.797 | 0.675 | 0.640  | 0.780  | 0.745 | 1.201      | 0.930 | 0.690  | 0.745 |
| I    | CACGTG | 0.660    | 0.833       | 0.835      | 0.836   | 0.490    | 0.862 | 0.761 | 0.585 | 0.880       | 0.850  | 0.740   | 0.825 | 0.706 | 0.810     | 0.910      | 0.583    | 0.883 | 0.790 | 0.402 | 0.870  | 0.690  | 0.392 | 1.012      | 0.000 | 0.690  | 0.780 |
| I    | GGGCTG | 0.659    | 0.802       | 0.740      | 0.698   | 0.770    | 0.468 | 0.514 | 0.727 | 0.900       | 0.817  | 0.680   | 0.590 | 0.534 | 0.590     | 0.840      | 0.860    | 0.520 | 0.750 | 0.710 | 0.675  | 0.700  | 0.778 | 1.191      | 0.890 | 0.800  | 0.745 |
| I    | AGCCCG | 0.753    | 0.897       | 0.708      | 0.772   | 0.570    | 0.582 | 0.595 | 0.602 | 1.010       | 0.993  | 0.673   | 0.562 | 0.636 | 0.690     | 0.910      | 0.847    | 0.493 | 0.752 | 0.720 | 0.595  | 0.785  | 0.568 | 1.226      | 0.660 | 0.520  | 0.575 |
| I    | GGCCTA | 0.610    | 0.792       | 0.737      | 0.630   | 0.690    | 0.627 | 0.543 | 0.602 | 0.890       | 0.853  | 0.550   | 0.465 | 0.688 | 0.480     | 0.690      | 0.813    | 0.287 | 0.688 | 0.625 | 0.640  | 0.655  | 0.620 | 0.980      | 0.890 | 0.770  | 0.520 |
| I    | AACCGG | 0.573    | 0.838       | 0.563      | 0.762   | 0.470    | 0.602 | 0.492 | 0.518 | 0.765       | 0.770  | 0.667   | 0.547 | 0.688 | 0.740     | 0.685      | 0.580    | 0.800 | 0.732 | 0.848 | 0.785  | 0.690  | 0.650 | 1.016      | 0.670 | 0.370  | 0.670 |
| I    | GCCCGT | 0.714    | 0.898       | 0.718      | 0.856   | 0.500    | 0.612 | 0.526 | 0.593 | 0.835       | 0.907  | 0.483   | 0.722 | 0.704 | 0.900     | 0.925      | 0.653    | 0.510 | 0.755 | 0.625 | 0.750  | 0.765  | 0.527 | 1.206      | 0.440 | 0.610  | 0.520 |
| I    | ACGTGG | 0.529    | 0.800       | 0.730      | 0.844   | 0.690    | 0.687 | 0.555 | 0.435 | 0.875       | 0.820  | 0.687   | 0.497 | 0.638 | 0.790     | 0.850      | 0.460    | 0.867 | 0.757 | 0.338 | 0.660  | 0.460  | 0.395 | 1.006      | 0.000 | 0.680  | 0.665 |
| I    | GGGCTC | 0.824    | 0.847       | 0.628      | 0.704   | 0.800    | 0.479 | 0.594 | 0.765 | 1.030       | 1.010  | 0.873   | 0.690 | 0.592 | 0.690     | 0.900      | 0.910    | 0.293 | 0.740 | 0.712 | 0.815  | 0.865  | 0.850 | 1.179      | 0.950 | 0.770  | 0.745 |
| I    | GGCCGA | 0.692    | 0.978       | 0.808      | 0.810   | 0.690    | 0.441 | 0.356 | 0.675 | 0.885       | 0.927  | 0.513   | 0.417 | 0.714 | 0.700     | 0.910      | 0.823    | 0.290 | 0.788 | 0.647 | 0.425  | 0.760  | 0.808 | 1.201      | 0.890 | 0.690  | 0.740 |
| I    | ACGCGA | 0.682    | 0.888       | 0.732      | 0.936   | 0.690    | 0.494 | 0.553 | 0.565 | 1.000       | 0.973  | 0.657   | 0.683 | 0.692 | 0.960     | 0.910      | 0.587    | 0.940 | 0.795 | 0.560 | 0.765  | 0.460  | 0.522 | 1.226      | 0.220 | 0.460  | 0.670 |
| I    | GGGCTA | 0.678    | 0.638       | 0.692      | 0.562   | 0.560    | 0.629 | 0.673 | 0.597 | 0.830       | 0.860  | 0.770   | 0.465 | 0.588 | 0.490     | 0.760      | 0.783    | 0.447 | 0.693 | 0.840 | 0.640  | 0.655  | 0.778 | 0.981      | 1.110 | 0.580  | 0.525 |
| I    | GTGGGG | 0.526    | 0.993       | 0.713      | 1.000   | 0.700    | 0.463 | 0.317 | 0.603 | 0.860       | 0.797  | 0.450   | 0.615 | 0.632 | 0.790     | 0.890      | 0.827    | 0.510 | 0.748 | 0.580 | 0.315  | 0.680  | 0.648 | 1.217      | 0.670 | 0.540  | 0.645 |
| I    | ACGGCC | 0.648    | 0.895       | 0.735      | 0.784   | 0.500    | 0.418 | 0.400 | 0.678 | 0.845       | 0.993  | 0.370   | 0.607 | 0.712 | 0.860     | 0.910      | 0.760    | 0.520 | 0.825 | 0.453 | 0.635  | 0.825  | 0.635 | 1.206      | 0.660 | 0.770  | 0.745 |

|    |        |       |       |       |       |       |       |       |       |       |       |       |       |       |       |       |       |       |       |       |       |       |       |       |       |       |       |
|----|--------|-------|-------|-------|-------|-------|-------|-------|-------|-------|-------|-------|-------|-------|-------|-------|-------|-------|-------|-------|-------|-------|-------|-------|-------|-------|-------|
| I  | CGACGT | 0.626 | 0.713 | 0.733 | 0.818 | 0.570 | 0.478 | 0.398 | 0.440 | 0.920 | 0.913 | 0.603 | 0.488 | 0.818 | 0.690 | 0.865 | 0.613 | 0.810 | 0.715 | 0.223 | 0.440 | 0.565 | 0.518 | 1.006 | 0.220 | 0.800 | 0.665 |
| I  | GAACCG | 0.539 | 0.775 | 0.467 | 0.600 | 0.440 | 0.483 | 0.439 | 0.535 | 0.795 | 0.760 | 0.450 | 0.532 | 0.624 | 0.540 | 0.690 | 0.657 | 0.573 | 0.668 | 0.750 | 0.625 | 0.780 | 0.675 | 0.980 | 0.720 | 0.700 | 0.890 |
| I  | ACCCGA | 0.550 | 0.785 | 0.645 | 0.884 | 0.690 | 0.626 | 0.522 | 0.520 | 0.785 | 0.873 | 0.607 | 0.725 | 0.622 | 0.540 | 0.725 | 0.723 | 0.673 | 0.748 | 0.667 | 0.555 | 0.575 | 0.512 | 1.017 | 0.670 | 0.500 | 0.470 |
| I  | ACCGGA | 0.568 | 0.840 | 0.723 | 0.940 | 0.480 | 0.585 | 0.551 | 0.573 | 0.870 | 0.887 | 0.383 | 0.835 | 0.610 | 0.590 | 0.740 | 0.653 | 0.723 | 0.708 | 0.680 | 0.670 | 0.750 | 0.665 | 1.018 | 0.670 | 0.280 | 0.575 |
| I  | ACCGGG | 0.704 | 0.993 | 0.688 | 1.006 | 0.270 | 0.638 | 0.555 | 0.578 | 0.985 | 0.973 | 0.607 | 0.845 | 0.738 | 0.790 | 0.910 | 0.663 | 0.740 | 0.817 | 0.788 | 0.760 | 0.690 | 0.722 | 1.226 | 0.450 | 0.330 | 0.670 |
| I  | CCGGAT | 0.682 | 0.750 | 0.348 | 0.744 | 0.670 | 0.582 | 0.613 | 0.630 | 0.800 | 0.770 | 0.447 | 0.748 | 0.714 | 0.520 | 0.715 | 0.773 | 0.807 | 0.730 | 0.728 | 0.650 | 0.580 | 0.625 | 1.010 | 0.660 | 0.140 | 0.670 |
| I  | AGGCCT | 0.831 | 0.680 | 0.683 | 0.766 | 0.910 | 0.653 | 0.647 | 0.627 | 1.005 | 0.810 | 0.837 | 0.675 | 0.788 | 0.460 | 0.700 | 0.873 | 0.513 | 0.877 | 0.677 | 0.810 | 0.820 | 0.675 | 1.040 | 0.890 | 0.930 | 0.905 |
| I  | AGCCGT | 0.724 | 0.700 | 0.603 | 0.760 | 0.470 | 0.385 | 0.518 | 0.622 | 0.880 | 0.807 | 0.500 | 0.737 | 0.592 | 0.690 | 0.675 | 0.723 | 0.740 | 0.845 | 0.453 | 0.680 | 0.645 | 0.557 | 1.040 | 0.670 | 0.590 | 0.685 |
| I  | AACGGC | 0.587 | 0.748 | 0.598 | 0.810 | 0.440 | 0.438 | 0.457 | 0.660 | 0.835 | 0.683 | 0.337 | 0.785 | 0.610 | 0.690 | 0.780 | 0.527 | 0.740 | 0.810 | 0.467 | 0.665 | 0.800 | 0.643 | 1.009 | 0.670 | 0.740 | 0.635 |
| I  | ATTGGG | 0.538 | 0.775 | 0.618 | 0.786 | 0.710 | 0.657 | 0.700 | 0.642 | 0.555 | 0.673 | 0.680 | 0.665 | 0.668 | 0.760 | 0.600 | 0.713 | 0.520 | 0.892 | 0.715 | 0.730 | 0.690 | 0.420 | 0.830 | 0.520 | 0.590 | 0.565 |
| I  | ACTGGG | 0.654 | 0.840 | 0.818 | 0.858 | 0.490 | 0.664 | 0.686 | 0.603 | 0.770 | 0.767 | 0.740 | 0.808 | 0.582 | 0.980 | 0.710 | 0.730 | 0.520 | 0.737 | 0.763 | 0.800 | 0.665 | 0.632 | 1.013 | 0.450 | 0.550 | 0.445 |
| I  | CGTGTC | 0.703 | 0.585 | 0.515 | 0.754 | 0.790 | 0.664 | 0.644 | 0.678 | 0.865 | 0.803 | 0.670 | 0.610 | 0.664 | 0.780 | 0.860 | 0.677 | 0.577 | 0.670 | 0.465 | 0.830 | 0.425 | 0.278 | 0.997 | 0.280 | 0.730 | 0.860 |
| I  | AACCGA | 0.421 | 0.668 | 0.663 | 0.798 | 0.470 | 0.623 | 0.384 | 0.442 | 0.555 | 0.670 | 0.537 | 0.542 | 0.674 | 0.540 | 0.590 | 0.547 | 0.603 | 0.745 | 0.843 | 0.585 | 0.715 | 0.675 | 0.800 | 0.890 | 0.620 | 0.575 |
| I  | AGCGCG | 0.624 | 0.860 | 0.575 | 0.866 | 0.700 | 0.378 | 0.409 | 0.670 | 0.980 | 0.973 | 0.623 | 0.713 | 0.662 | 0.740 | 0.885 | 0.720 | 0.720 | 0.770 | 0.677 | 0.560 | 0.650 | 0.720 | 1.226 | 0.670 | 0.370 | 0.575 |
| I  | AATGGG | 0.629 | 0.645 | 0.732 | 0.628 | 0.660 | 0.747 | 0.698 | 0.678 | 0.645 | 0.543 | 0.727 | 0.802 | 0.690 | 0.780 | 0.600 | 0.517 | 0.520 | 0.812 | 0.788 | 0.790 | 0.680 | 0.608 | 0.796 | 0.520 | 0.780 | 0.565 |
| I  | CCCAAT | 0.538 | 0.775 | 0.618 | 0.786 | 0.710 | 0.657 | 0.700 | 0.642 | 0.555 | 0.673 | 0.680 | 0.665 | 0.668 | 0.760 | 0.600 | 0.713 | 0.520 | 0.892 | 0.715 | 0.730 | 0.690 | 0.420 | 0.830 | 0.520 | 0.590 | 0.565 |
| I  | CCGAAA | 0.588 | 0.690 | 0.638 | 0.970 | 0.450 | 0.448 | 0.463 | 0.590 | 0.705 | 0.757 | 0.457 | 0.750 | 0.772 | 0.840 | 0.770 | 0.687 | 0.590 | 0.732 | 0.660 | 0.340 | 0.645 | 0.472 | 0.894 | 0.740 | 0.290 | 0.755 |
| I  | CGGTGG | 0.334 | 0.907 | 0.807 | 0.600 | 0.430 | 0.422 | 0.327 | 0.600 | 0.875 | 0.843 | 0.667 | 0.453 | 0.594 | 0.910 | 0.830 | 0.590 | 0.693 | 0.777 | 0.710 | 0.540 | 0.570 | 0.740 | 1.220 | 0.450 | 0.680 | 0.670 |
| I  | CCACCG | 0.334 | 0.907 | 0.807 | 0.900 | 0.430 | 0.422 | 0.327 | 0.600 | 0.875 | 0.843 | 0.667 | 0.453 | 0.594 | 0.910 | 0.830 | 0.590 | 0.693 | 0.777 | 0.710 | 0.540 | 0.570 | 0.740 | 1.220 | 0.450 | 0.680 | 0.670 |
| II | CGCGCT | 0.762 | 0.887 | 0.772 | 0.902 | 0.340 | 0.507 | 0.583 | 0.728 | 1.000 | 0.993 | 0.667 | 0.773 | 0.540 | 0.690 | 0.910 | 0.647 | 0.717 | 0.767 | 0.718 | 0.795 | 0.800 | 0.525 | 1.226 | 0.660 | 0.710 | 0.665 |
| II | GCCCGC | 0.727 | 1.073 | 0.732 | 0.988 | 0.580 | 0.420 | 0.517 | 0.732 | 0.990 | 1.040 | 0.607 | 0.627 | 0.592 | 0.850 | 1.095 | 0.873 | 0.290 | 0.800 | 0.655 | 0.665 | 0.765 | 0.583 | 1.413 | 0.660 | 0.590 | 0.530 |
| II | ACGGGC | 0.714 | 0.898 | 0.718 | 0.856 | 0.500 | 0.612 | 0.526 | 0.593 | 0.835 | 0.907 | 0.483 | 0.722 | 0.704 | 0.900 | 0.925 | 0.653 | 0.510 | 0.755 | 0.625 | 0.750 | 0.765 | 0.527 | 1.206 | 0.440 | 0.610 | 0.520 |
| II | GCGCGT | 0.692 | 0.873 | 0.612 | 0.814 | 0.720 | 0.510 | 0.624 | 0.650 | 0.930 | 0.920 | 0.620 | 0.740 | 0.680 | 0.850 | 0.920 | 0.697 | 0.727 | 0.740 | 0.620 | 0.845 | 0.640 | 0.407 | 1.204 | 0.440 | 0.670 | 0.585 |
| II | AGCGCG | 0.762 | 0.887 | 0.772 | 0.902 | 0.340 | 0.507 | 0.583 | 0.728 | 1.000 | 0.993 | 0.667 | 0.773 | 0.540 | 0.690 | 0.910 | 0.647 | 0.717 | 0.767 | 0.718 | 0.795 | 0.800 | 0.525 | 1.226 | 0.660 | 0.710 | 0.665 |
| II | CGGGCC | 0.758 | 0.995 | 0.698 | 0.862 | 0.690 | 0.503 | 0.518 | 0.765 | 1.025 | 1.023 | 0.663 | 0.557 | 0.784 | 0.760 | 1.060 | 0.917 | 0.273 | 0.767 | 0.677 | 0.595 | 0.790 | 0.598 | 1.396 | 0.490 | 0.620 | 0.740 |
| II | ACGGCG | 0.692 | 0.873 | 0.612 | 0.814 | 0.720 | 0.510 | 0.624 | 0.648 | 0.930 | 0.920 | 0.620 | 0.740 | 0.680 | 0.850 | 0.920 | 0.697 | 0.727 | 0.740 | 0.620 | 0.845 | 0.640 | 0.407 | 1.204 | 0.440 | 0.670 | 0.585 |
| II | CGCGTG | 0.714 | 0.932 | 0.723 | 0.798 | 0.490 | 0.664 | 0.683 | 0.655 | 0.895 | 0.867 | 0.673 | 0.807 | 0.748 | 0.980 | 0.830 | 0.727 | 0.670 | 0.795 | 0.622 | 0.775 | 0.650 | 0.398 | 1.218 | 0.220 | 0.650 | 0.665 |
| II | CAGGCC | 0.732 | 0.812 | 0.718 | 0.752 | 0.710 | 0.612 | 0.570 | 0.707 | 0.905 | 0.800 | 0.660 | 0.680 | 0.644 | 0.590 | 0.830 | 0.823 | 0.487 | 0.743 | 0.627 | 0.675 | 0.870 | 0.565 | 1.190 | 0.670 | 0.780 | 0.625 |
| II | CCGGCC | 0.590 | 1.040 | 0.780 | 0.940 | 0.730 | 0.408 | 0.356 | 0.732 | 1.010 | 0.950 | 0.437 | 0.625 | 0.744 | 0.810 | 1.045 | 0.867 | 0.497 | 0.762 | 0.677 | 0.530 | 0.780 | 0.725 | 1.398 | 0.720 | 0.550 | 0.740 |
| II | CGGGCT | 0.753 | 0.897 | 0.708 | 0.772 | 0.570 | 0.582 | 0.595 | 0.602 | 1.010 | 0.993 | 0.673 | 0.562 | 0.638 | 0.690 | 0.910 | 0.847 | 0.493 | 0.752 | 0.720 | 0.595 | 0.785 | 0.568 | 1.226 | 0.660 | 0.520 | 0.575 |
| II | CGTCCG | 0.592 | 0.873 | 0.707 | 0.688 | 0.690 | 0.556 | 0.446 | 0.573 | 0.985 | 0.993 | 0.220 | 0.545 | 0.724 | 0.760 | 0.915 | 0.760 | 0.587 | 0.617 | 0.430 | 0.425 | 0.755 | 0.682 | 1.236 | 0.520 | 0.630 | 0.775 |
| II | TCGGCC | 0.692 | 0.978 | 0.808 | 0.810 | 0.690 | 0.441 | 0.356 | 0.675 | 0.885 | 0.927 | 0.513 | 0.417 | 0.714 | 0.700 | 0.910 | 0.823 | 0.290 | 0.788 | 0.647 | 0.425 | 0.760 | 0.808 | 1.201 | 0.890 | 0.690 | 0.740 |
| II | GCGGCG | 0.747 | 1.028 | 0.747 | 0.960 | 0.540 | 0.113 | 0.264 | 0.752 | 1.125 | 1.010 | 0.640 | 0.613 | 0.644 | 0.860 | 1.080 | 0.827 | 0.527 | 0.807 | 0.528 | 0.655 | 0.670 | 0.615 | 1.398 | 0.500 | 0.630 | 0.760 |
| II | CGCGTC | 0.791 | 0.815 | 0.615 | 0.772 | 0.570 | 0.478 | 0.548 | 0.725 | 1.010 | 0.903 | 0.713 | 0.833 | 0.768 | 0.760 | 0.900 | 0.687 | 0.577 | 0.735 | 0.400 | 0.650 | 0.570 | 0.475 | 1.174 | 0.450 | 0.700 | 0.775 |
| II | GGCCGG | 0.590 | 1.038 | 0.780 | 0.940 | 0.730 | 0.408 | 0.356 | 0.732 | 1.010 | 0.950 | 0.437 | 0.625 | 0.744 | 0.810 | 1.045 | 0.867 | 0.497 | 0.762 | 0.677 | 0.530 | 0.780 | 0.725 | 1.398 | 0.720 | 0.550 | 0.740 |
| II | CGCGCC | 0.747 | 1.028 | 0.790 | 0.898 | 0.570 | 0.413 | 0.534 | 0.818 | 1.035 | 1.023 | 0.673 | 0.770 | 0.704 | 0.860 | 1.055 | 0.847 | 0.493 | 0.750 | 0.620 | 0.650 | 0.760 | 0.522 | 1.394 | 0.490 | 0.730 | 0.775 |
| II | GCGGGG | 0.700 | 1.065 | 0.775 | 1.038 | 0.550 | 0.314 | 0.433 | 0.670 | 1.030 | 0.927 | 0.680 | 0.613 | 0.634 | 0.850 | 1.130 | 0.773 | 0.500 | 0.840 | 0.672 | 0.755 | 0.730 | 0.615 | 1.401 | 0.440 | 0.450 | 0.540 |
| II | CCGGGT | 0.676 | 0.950 | 0.570 | 0.926 | 0.490 | 0.605 | 0.613 | 0.575 | 0.995 | 0.973 | 0.670 | 0.715 | 0.674 | 0.740 | 0.910 | 0.810 | 0.737 | 0.840 | 0.788 | 0.765 | 0.565 | 0.547 | 1.226 | 0.450 | 0.270 | 0.575 |
| II | GGCGCG | 0.747 | 1.028 | 0.790 | 0.898 | 0.570 | 0.413 | 0.534 | 0.818 | 1.035 | 1.023 | 0.673 | 0.770 | 0.704 | 0.860 | 1.055 | 0.847 | 0.493 | 0.750 | 0.620 | 0.650 | 0.760 | 0.522 | 1.394 | 0.490 | 0.730 | 0.775 |
| II | GGCGCC | 0.889 | 1.067 | 0.758 | 0.950 | 0.780 | 0.203 | 0.414 | 0.952 | 1.085 | 1.217 | 0.767 | 0.718 | 0.732 | 0.810 | 1.075 | 0.990 | 0.310 | 0.890 | 0.527 | 0.555 | 0.790 | 0.738 | 1.410 | 0.720 | 0.910 | 0.960 |
| II | CCCGGC | 0.699 | 1.050 | 0.842 | 1.074 | 0.490 | 0.433 | 0.466 | 0.732 | 1.005 | 0.917 | 0.560 | 0.762 | 0.650 | 0.910 | 1.110 | 0.860 | 0.613 | 0.827 | 0.630 | 0.540 | 0.795 | 0.668 | 1.401 | 0.500 | 0.330 | 0.645 |
| II | CGGGTC | 0.672 | 0.778 | 0.475 | 0.726 | 0.660 | 0.488 | 0.513 | 0.662 | 1.005 | 0.900 | 0.670 | 0.705 | 0.722 | 0.540 | 0.920 | 0.850 | 0.353 | 0.747 | 0.617 | 0.695 | 0.650 | 0.493 | 1.172 | 0.500 | 0.510 | 0.850 |
| II | CACGCG | 0.714 | 0.932 | 0.723 | 0.798 | 0.490 | 0.664 | 0.683 | 0.655 | 0.895 | 0.867 | 0.673 | 0.807 | 0.748 | 0.980 | 0.830 | 0.727 | 0.670 | 0.795 | 0.622 | 0.775 | 0.650 | 0.398 | 1.218 | 0.220 | 0.650 | 0.665 |
| II | CGCGCG | 0.827 | 1.065 | 0.917 | 1.016 | 0.570 | 0.623 | 0.628 | 0.788 | 1.120 | 1.087 | 0.453 | 0.773 | 0.770 | 0.920 | 1.070 | 0.860 | 0.717 | 0.820 | 0.807 | 0.740 | 0.875 | 0.620 | 1.444 | 0.440 | 0.640 | 0.675 |
| II | CGTGGC | 0.631 | 0.807 | 0.690 | 0.900 | 0.560 | 0.482 | 0.536 |       |       |       |       |       |       |       |       |       |       |       |       |       |       |       |       |       |       |       |

|    |        |       |       |       |       |       |       |       |       |       |       |       |       |       |       |       |       |       |       |       |       |       |       |       |       |       |       |
|----|--------|-------|-------|-------|-------|-------|-------|-------|-------|-------|-------|-------|-------|-------|-------|-------|-------|-------|-------|-------|-------|-------|-------|-------|-------|-------|-------|
| II | CGGCGC | 0.691 | 0.995 | 0.702 | 0.916 | 0.650 | 0.158 | 0.314 | 0.768 | 1.125 | 1.010 | 0.657 | 0.600 | 0.656 | 0.770 | 1.085 | 0.830 | 0.510 | 0.810 | 0.528 | 0.615 | 0.670 | 0.682 | 1.398 | 0.500 | 0.660 | 0.835 |
| II | CGCCAC | 0.644 | 0.862 | 0.783 | 0.950 | 0.670 | 0.273 | 0.385 | 0.770 | 0.910 | 0.890 | 0.670 | 0.670 | 0.668 | 0.750 | 0.895 | 0.750 | 0.443 | 0.800 | 0.325 | 0.435 | 0.535 | 0.383 | 1.218 | 0.720 | 0.730 | 0.665 |
| II | ACGGCG | 0.771 | 0.930 | 0.815 | 0.902 | 0.340 | 0.269 | 0.346 | 0.597 | 1.005 | 0.997 | 0.480 | 0.618 | 0.692 | 0.910 | 0.890 | 0.603 | 0.740 | 0.862 | 0.445 | 0.635 | 0.695 | 0.557 | 1.228 | 0.440 | 0.640 | 0.780 |
| II | TCCGGC | 0.717 | 0.993 | 0.817 | 0.936 | 0.720 | 0.602 | 0.503 | 0.600 | 0.885 | 0.897 | 0.533 | 0.583 | 0.624 | 0.710 | 0.940 | 0.840 | 0.450 | 0.752 | 0.792 | 0.530 | 0.690 | 0.695 | 1.209 | 0.660 | 0.500 | 0.530 |
| II | CCCGGT | 0.704 | 0.993 | 0.688 | 1.006 | 0.270 | 0.638 | 0.555 | 0.578 | 0.985 | 0.973 | 0.607 | 0.845 | 0.738 | 0.790 | 0.910 | 0.663 | 0.740 | 0.817 | 0.788 | 0.760 | 0.690 | 0.722 | 1.226 | 0.450 | 0.330 | 0.670 |
| II | ACGCCG | 0.710 | 0.930 | 0.805 | 0.810 | 0.570 | 0.302 | 0.391 | 0.635 | 1.005 | 0.997 | 0.660 | 0.643 | 0.700 | 0.910 | 0.880 | 0.737 | 0.733 | 0.840 | 0.443 | 0.600 | 0.565 | 0.525 | 1.227 | 0.450 | 0.560 | 0.800 |
| II | TCGCGC | 0.790 | 0.890 | 0.827 | 0.916 | 0.560 | 0.503 | 0.596 | 0.655 | 0.900 | 0.900 | 0.630 | 0.635 | 0.652 | 0.710 | 0.940 | 0.747 | 0.667 | 0.740 | 0.672 | 0.625 | 0.640 | 0.552 | 1.207 | 0.660 | 0.510 | 0.640 |
| II | GGCCGT | 0.648 | 0.895 | 0.735 | 0.784 | 0.500 | 0.418 | 0.400 | 0.678 | 0.845 | 0.993 | 0.370 | 0.607 | 0.712 | 0.860 | 0.910 | 0.760 | 0.520 | 0.825 | 0.453 | 0.635 | 0.825 | 0.635 | 1.206 | 0.660 | 0.770 | 0.745 |
| II | CCACGC | 0.576 | 0.970 | 0.733 | 0.892 | 0.770 | 0.519 | 0.548 | 0.603 | 0.895 | 0.783 | 0.653 | 0.388 | 0.650 | 1.000 | 0.925 | 0.690 | 0.653 | 0.765 | 0.560 | 0.665 | 0.515 | 0.398 | 1.194 | 0.220 | 0.670 | 0.645 |
| II | GCGTCG | 0.700 | 0.870 | 0.707 | 0.824 | 0.770 | 0.310 | 0.365 | 0.613 | 1.010 | 0.883 | 0.657 | 0.448 | 0.734 | 0.860 | 0.865 | 0.773 | 0.593 | 0.685 | 0.443 | 0.440 | 0.530 | 0.590 | 1.191 | 0.450 | 0.850 | 0.755 |
| II | CGGCTG | 0.620 | 0.873 | 0.712 | 0.716 | 0.660 | 0.341 | 0.444 | 0.732 | 0.870 | 0.867 | 0.667 | 0.600 | 0.586 | 0.760 | 0.810 | 0.803 | 0.653 | 0.708 | 0.652 | 0.575 | 0.775 | 0.748 | 1.218 | 0.670 | 0.710 | 0.670 |
| II | CGCCGC | 0.747 | 1.028 | 0.747 | 0.960 | 0.540 | 0.113 | 0.264 | 0.752 | 1.125 | 1.010 | 0.640 | 0.613 | 0.644 | 0.860 | 1.080 | 0.827 | 0.527 | 0.807 | 0.528 | 0.655 | 0.670 | 0.615 | 1.398 | 0.500 | 0.630 | 0.760 |
| II | CCTGGC | 0.571 | 0.845 | 0.843 | 0.906 | 0.710 | 0.639 | 0.661 | 0.583 | 0.840 | 0.763 | 0.677 | 0.615 | 0.674 | 1.040 | 0.910 | 0.837 | 0.690 | 0.670 | 0.557 | 0.770 | 0.675 | 0.683 | 1.208 | 0.280 | 0.550 | 0.430 |
| II | GCCGTT | 0.587 | 0.748 | 0.598 | 0.810 | 0.440 | 0.438 | 0.457 | 0.660 | 0.835 | 0.683 | 0.337 | 0.785 | 0.610 | 0.690 | 0.780 | 0.527 | 0.740 | 0.810 | 0.467 | 0.665 | 0.800 | 0.643 | 1.009 | 0.670 | 0.740 | 0.635 |
| II | GGCGGG | 0.558 | 1.042 | 0.898 | 0.934 | 0.560 | 0.283 | 0.370 | 0.740 | 1.015 | 0.947 | 0.657 | 0.835 | 0.714 | 1.020 | 1.055 | 0.793 | 0.390 | 0.777 | 0.625 | 0.540 | 0.800 | 0.555 | 1.397 | 0.520 | 0.540 | 0.670 |
| II | CGGCGG | 0.548 | 1.078 | 0.893 | 0.916 | 0.650 | 0.202 | 0.254 | 0.665 | 1.095 | 1.070 | 0.653 | 0.583 | 0.676 | 0.990 | 1.025 | 0.737 | 0.733 | 0.818 | 0.638 | 0.460 | 0.775 | 0.740 | 1.444 | 0.520 | 0.610 | 0.780 |
| II | CGTCGG | 0.496 | 0.907 | 0.777 | 0.872 | 0.790 | 0.393 | 0.272 | 0.507 | 0.965 | 0.870 | 0.450 | 0.508 | 0.812 | 0.810 | 0.885 | 0.783 | 0.543 | 0.693 | 0.425 | 0.345 | 0.645 | 0.723 | 1.237 | 0.300 | 0.660 | 0.650 |
| II | CGCGAC | 0.704 | 0.885 | 0.713 | 0.946 | 0.570 | 0.475 | 0.463 | 0.735 | 0.870 | 0.863 | 0.643 | 0.615 | 0.702 | 0.810 | 0.890 | 0.847 | 0.637 | 0.698 | 0.525 | 0.425 | 0.690 | 0.443 | 1.216 | 0.500 | 0.540 | 0.675 |
| II | CCACGT | 0.529 | 0.797 | 0.730 | 0.844 | 0.690 | 0.687 | 0.555 | 0.435 | 0.875 | 0.820 | 0.687 | 0.497 | 0.638 | 0.790 | 0.850 | 0.460 | 0.867 | 0.757 | 0.338 | 0.660 | 0.460 | 0.395 | 1.006 | 0.000 | 0.680 | 0.665 |
| II | CGACGC | 0.700 | 0.870 | 0.707 | 0.824 | 0.770 | 0.310 | 0.365 | 0.613 | 1.010 | 0.883 | 0.657 | 0.448 | 0.734 | 0.860 | 0.865 | 0.773 | 0.593 | 0.685 | 0.443 | 0.440 | 0.530 | 0.590 | 1.191 | 0.450 | 0.850 | 0.755 |
| II | CCGGTT | 0.573 | 0.838 | 0.563 | 0.762 | 0.470 | 0.602 | 0.492 | 0.518 | 0.765 | 0.770 | 0.667 | 0.547 | 0.688 | 0.740 | 0.685 | 0.580 | 0.800 | 0.732 | 0.848 | 0.785 | 0.690 | 0.650 | 1.016 | 0.670 | 0.370 | 0.670 |
| II | GGGTCG | 0.514 | 0.855 | 0.598 | 0.732 | 0.690 | 0.502 | 0.371 | 0.648 | 0.910 | 0.877 | 0.663 | 0.487 | 0.766 | 0.630 | 0.800 | 0.810 | 0.370 | 0.708 | 0.545 | 0.400 | 0.530 | 0.682 | 1.190 | 0.670 | 0.790 | 0.775 |
| II | GTCCCG | 0.657 | 0.873 | 0.628 | 0.846 | 0.450 | 0.492 | 0.552 | 0.763 | 0.865 | 0.867 | 0.443 | 0.620 | 0.728 | 0.760 | 0.910 | 0.813 | 0.423 | 0.713 | 0.537 | 0.495 | 0.755 | 0.520 | 1.217 | 0.500 | 0.350 | 0.855 |
| II | CGGGCC | 0.801 | 1.038 | 0.795 | 0.990 | 0.340 | 0.278 | 0.446 | 0.670 | 1.085 | 0.997 | 0.563 | 0.665 | 0.646 | 0.910 | 1.100 | 0.833 | 0.640 | 0.785 | 0.573 | 0.645 | 0.670 | 0.617 | 1.398 | 0.280 | 0.520 | 0.755 |
| II | GAGCCC | 0.824 | 0.847 | 0.628 | 0.704 | 0.800 | 0.479 | 0.594 | 0.765 | 1.030 | 1.010 | 0.873 | 0.690 | 0.592 | 0.690 | 0.900 | 0.910 | 0.293 | 0.740 | 0.712 | 0.815 | 0.865 | 0.850 | 1.179 | 0.950 | 0.770 | 0.745 |
| II | CGCCGA | 0.613 | 0.940 | 0.870 | 0.810 | 0.570 | 0.290 | 0.224 | 0.653 | 0.960 | 0.930 | 0.600 | 0.452 | 0.698 | 0.770 | 0.885 | 0.750 | 0.520 | 0.785 | 0.630 | 0.445 | 0.695 | 0.675 | 1.220 | 0.670 | 0.510 | 0.670 |
| II | CGGCCG | 0.656 | 1.090 | 0.862 | 0.914 | 0.690 | 0.378 | 0.407 | 0.752 | 1.105 | 1.087 | 0.443 | 0.557 | 0.732 | 0.910 | 1.045 | 0.890 | 0.523 | 0.823 | 0.652 | 0.540 | 0.935 | 0.857 | 1.444 | 0.740 | 0.820 | 0.885 |
| II | CGCCGT | 0.771 | 0.930 | 0.815 | 0.902 | 0.340 | 0.269 | 0.346 | 0.597 | 1.005 | 0.997 | 0.480 | 0.618 | 0.692 | 0.910 | 0.890 | 0.603 | 0.740 | 0.862 | 0.445 | 0.635 | 0.695 | 0.557 | 1.228 | 0.440 | 0.640 | 0.780 |
| II | CGTGCC | 0.609 | 0.807 | 0.675 | 0.776 | 0.710 | 0.581 | 0.615 | 0.592 | 0.865 | 0.927 | 0.450 | 0.613 | 0.600 | 0.860 | 0.910 | 0.810 | 0.493 | 0.705 | 0.480 | 0.815 | 0.560 | 0.425 | 1.208 | 0.270 | 0.820 | 0.775 |
| II | CCGAAC | 0.404 | 0.815 | 0.532 | 0.784 | 0.670 | 0.623 | 0.459 | 0.580 | 0.680 | 0.740 | 0.230 | 0.665 | 0.638 | 0.590 | 0.780 | 0.790 | 0.593 | 0.667 | 0.732 | 0.495 | 0.760 | 0.568 | 1.046 | 0.750 | 0.550 | 0.645 |
| II | CGGTTC | 0.539 | 0.775 | 0.467 | 0.600 | 0.440 | 0.483 | 0.439 | 0.535 | 0.800 | 0.760 | 0.450 | 0.532 | 0.624 | 0.540 | 0.690 | 0.657 | 0.573 | 0.668 | 0.750 | 0.625 | 0.780 | 0.675 | 0.980 | 0.720 | 0.700 | 0.890 |
| II | CGTGGG | 0.499 | 0.990 | 0.850 | 0.974 | 0.570 | 0.605 | 0.496 | 0.527 | 0.985 | 0.863 | 0.453 | 0.503 | 0.690 | 1.040 | 0.955 | 0.737 | 0.337 | 0.780 | 0.543 | 0.570 | 0.550 | 0.530 | 1.237 | 0.070 | 0.650 | 0.645 |
| II | CCGCCG | 0.548 | 1.078 | 0.893 | 0.916 | 0.650 | 0.202 | 0.254 | 0.665 | 1.095 | 1.070 | 0.653 | 0.580 | 0.676 | 0.990 | 1.025 | 0.737 | 0.733 | 0.818 | 0.638 | 0.460 | 0.775 | 0.740 | 1.444 | 0.520 | 0.610 | 0.780 |
| II | GGGCCA | 0.661 | 0.868 | 0.818 | 0.858 | 0.560 | 0.276 | 0.428 | 0.803 | 0.995 | 0.930 | 0.667 | 0.682 | 0.660 | 0.660 | 0.885 | 0.767 | 0.443 | 0.807 | 0.445 | 0.445 | 0.565 | 0.520 | 1.208 | 0.720 | 0.690 | 0.635 |
| II | TGGCGC | 0.661 | 0.868 | 0.818 | 0.858 | 0.560 | 0.276 | 0.428 | 0.803 | 0.995 | 0.930 | 0.667 | 0.682 | 0.660 | 0.660 | 0.885 | 0.767 | 0.443 | 0.807 | 0.445 | 0.445 | 0.565 | 0.520 | 1.207 | 0.720 | 0.690 | 0.635 |
| II | CGACCC | 0.514 | 0.855 | 0.598 | 0.732 | 0.690 | 0.502 | 0.371 | 0.648 | 0.910 | 0.877 | 0.663 | 0.487 | 0.766 | 0.630 | 0.800 | 0.810 | 0.370 | 0.708 | 0.545 | 0.400 | 0.530 | 0.682 | 1.190 | 0.670 | 0.790 | 0.775 |
| II | ACGGCC | 0.528 | 0.900 | 0.672 | 0.864 | 0.480 | 0.429 | 0.329 | 0.592 | 0.840 | 0.910 | 0.513 | 0.810 | 0.716 | 0.680 | 0.895 | 0.737 | 0.687 | 0.738 | 0.692 | 0.575 | 0.765 | 0.625 | 1.206 | 0.660 | 0.510 | 0.575 |
| II | CCCACG | 0.499 | 0.990 | 0.850 | 0.974 | 0.570 | 0.605 | 0.496 | 0.527 | 0.985 | 0.863 | 0.453 | 0.503 | 0.690 | 1.040 | 0.955 | 0.737 | 0.337 | 0.780 | 0.543 | 0.570 | 0.550 | 0.530 | 1.237 | 0.070 | 0.650 | 0.645 |
| II | CTGGCC | 0.681 | 0.893 | 0.850 | 0.834 | 0.730 | 0.576 | 0.578 | 0.782 | 0.860 | 1.017 | 0.637 | 0.462 | 0.756 | 0.830 | 0.900 | 0.877 | 0.447 | 0.760 | 0.650 | 0.555 | 0.765 | 0.720 | 1.203 | 0.720 | 0.770 | 0.555 |
| II | GCCGGA | 0.679 | 1.020 | 0.837 | 0.974 | 0.560 | 0.387 | 0.463 | 0.645 | 0.880 | 0.893 | 0.333 | 0.778 | 0.690 | 0.810 | 0.945 | 0.860 | 0.613 | 0.732 | 0.625 | 0.455 | 0.755 | 0.680 | 1.209 | 0.720 | 0.280 | 0.640 |
| II | ACGTCC | 0.626 | 0.713 | 0.733 | 0.818 | 0.570 | 0.478 | 0.398 | 0.440 | 0.920 | 0.913 | 0.603 | 0.488 | 0.818 | 0.690 | 0.865 | 0.613 | 0.810 | 0.715 | 0.223 | 0.440 | 0.565 | 0.518 | 1.006 | 0.220 | 0.800 | 0.665 |
| II | CGGACC | 0.562 | 0.778 | 0.475 | 0.690 | 0.690 | 0.524 | 0.407 | 0.605 | 0.905 | 0.963 | 0.443 | 0.460 | 0.740 | 0.540 | 0.900 | 0.927 | 0.367 | 0.643 | 0.657 | 0.505 | 0.765 | 0.547 | 1.199 | 0.720 | 0.610 | 0.870 |
| II | GCGCTC | 0.798 | 0.870 | 0.745 | 0.790 | 0.580 | 0.490 | 0.582 | 0.797 | 0.900 | 0.837 | 0.660 | 0.570 | 0.530 | 0.740 | 0.915 | 0.693 | 0.513 | 0.715 | 0.750 | 0.855 | 0.870 | 0.768 | 1.184 | 0.880 | 0.950 | 0.640 |
| II | CAGCCC | 0.658 | 0.802 | 0.740 | 0.698 | 0.770 | 0.468 | 0.514 | 0.727 | 0.900 | 0.817 | 0.680 | 0.590 | 0.534 | 0.590 | 0.840 | 0.860 | 0.520 | 0.750 | 0.710 | 0.675 | 0.700 | 0.778 | 1.191 | 0.890 | 0.800 | 0.745 |
| II | GCGCGA | 0.790 | 0.890 | 0.827 | 0.916 | 0.560 |       |       |       |       |       |       |       |       |       |       |       |       |       |       |       |       |       |       |       |       |       |

|    |        |       |       |       |       |       |       |       |       |       |       |       |       |       |       |       |       |       |       |       |       |       |       |       |       |       |       |
|----|--------|-------|-------|-------|-------|-------|-------|-------|-------|-------|-------|-------|-------|-------|-------|-------|-------|-------|-------|-------|-------|-------|-------|-------|-------|-------|-------|
| II | CCCGGA | 0.709 | 0.952 | 0.867 | 0.978 | 0.490 | 0.605 | 0.570 | 0.590 | 1.000 | 0.917 | 0.473 | 0.653 | 0.728 | 0.820 | 0.950 | 0.847 | 0.583 | 0.805 | 0.790 | 0.680 | 0.775 | 0.510 | 1.227 | 0.670 | 0.090 | 0.645 |
| II | CGCGCA | 0.748 | 0.932 | 0.857 | 0.844 | 0.570 | 0.522 | 0.535 | 0.722 | 0.905 | 0.877 | 0.647 | 0.547 | 0.602 | 0.940 | 0.845 | 0.780 | 0.517 | 0.743 | 0.785 | 0.665 | 0.655 | 0.402 | 1.222 | 0.670 | 0.490 | 0.665 |
| II | GACGCG | 0.791 | 0.815 | 0.615 | 0.772 | 0.570 | 0.478 | 0.548 | 0.725 | 1.010 | 0.903 | 0.713 | 0.833 | 0.768 | 0.760 | 0.900 | 0.687 | 0.577 | 0.735 | 0.400 | 0.650 | 0.570 | 0.475 | 1.174 | 0.450 | 0.700 | 0.775 |
| II | TCCCGG | 0.666 | 0.868 | 0.882 | 0.776 | 0.430 | 0.313 | 0.342 | 0.585 | 0.965 | 0.933 | 0.777 | 0.450 | 0.762 | 0.930 | 0.885 | 0.643 | 0.673 | 0.785 | 0.660 | 0.460 | 0.755 | 0.708 | 1.221 | 0.670 | 0.440 | 0.675 |
| II | GCGGGA | 0.657 | 0.892 | 0.760 | 0.910 | 0.340 | 0.468 | 0.582 | 0.703 | 0.875 | 0.900 | 0.547 | 0.707 | 0.636 | 0.850 | 0.955 | 0.697 | 0.473 | 0.750 | 0.675 | 0.545 | 0.645 | 0.547 | 1.207 | 0.670 | 0.320 | 0.675 |
| II | TAGCGC | 0.633 | 0.660 | 0.702 | 0.720 | 0.340 | 0.492 | 0.599 | 0.682 | 0.825 | 0.713 | 0.560 | 0.595 | 0.490 | 0.800 | 0.620 | 0.660 | 0.667 | 0.675 | 0.665 | 0.755 | 0.575 | 0.989 | 0.890 | 0.690 | 0.415 |       |
| II | CGCACG | 0.634 | 0.978 | 0.802 | 0.794 | 0.790 | 0.654 | 0.616 | 0.570 | 1.000 | 0.990 | 0.227 | 0.673 | 0.620 | 0.920 | 0.945 | 0.787 | 0.540 | 0.720 | 0.603 | 0.650 | 0.655 | 0.495 | 1.236 | 0.290 | 0.810 | 0.665 |
| II | GTGCCG | 0.644 | 0.885 | 0.690 | 0.852 | 0.450 | 0.290 | 0.376 | 0.775 | 0.905 | 0.893 | 0.453 | 0.690 | 0.570 | 0.760 | 0.890 | 0.850 | 0.500 | 0.777 | 0.330 | 0.415 | 0.535 | 0.497 | 1.218 | 0.720 | 0.540 | 0.890 |
| II | GAGCGC | 0.798 | 0.870 | 0.745 | 0.790 | 0.580 | 0.490 | 0.582 | 0.797 | 0.900 | 0.837 | 0.660 | 0.570 | 0.530 | 0.740 | 0.915 | 0.693 | 0.513 | 0.715 | 0.750 | 0.855 | 0.870 | 0.768 | 1.184 | 0.880 | 0.950 | 0.640 |
| II | CCGCGT | 0.606 | 0.882 | 0.683 | 0.916 | 0.490 | 0.474 | 0.584 | 0.733 | 0.980 | 0.973 | 0.727 | 0.873 | 0.554 | 0.800 | 0.910 | 0.597 | 0.520 | 0.780 | 0.818 | 0.760 | 0.765 | 0.613 | 1.226 | 0.520 | 0.540 | 0.555 |
| II | GGTTCG | 0.400 | 0.785 | 0.510 | 0.586 | 0.700 | 0.702 | 0.543 | 0.607 | 0.795 | 0.790 | 0.447 | 0.668 | 0.700 | 0.640 | 0.770 | 0.760 | 0.517 | 0.603 | 0.722 | 0.625 | 0.670 | 0.555 | 1.028 | 0.720 | 0.800 | 0.780 |
| II | GGCCCT | 0.719 | 0.855 | 0.668 | 0.786 | 0.720 | 0.487 | 0.551 | 0.682 | 0.860 | 1.000 | 0.590 | 0.642 | 0.666 | 0.640 | 0.930 | 0.760 | 0.297 | 0.835 | 0.680 | 0.785 | 0.905 | 0.763 | 1.206 | 0.720 | 0.850 | 0.850 |
| II | GGTCCG | 0.562 | 0.778 | 0.475 | 0.690 | 0.690 | 0.524 | 0.407 | 0.605 | 0.905 | 0.963 | 0.443 | 0.460 | 0.740 | 0.540 | 0.900 | 0.927 | 0.367 | 0.643 | 0.657 | 0.505 | 0.765 | 0.547 | 1.199 | 0.720 | 0.610 | 0.870 |
| II | CCGAGC | 0.534 | 0.818 | 0.615 | 0.874 | 0.870 | 0.528 | 0.430 | 0.632 | 0.790 | 0.820 | 0.457 | 0.633 | 0.594 | 0.600 | 0.905 | 0.853 | 0.593 | 0.668 | 0.812 | 0.530 | 0.565 | 0.667 | 1.200 | 0.660 | 0.620 | 0.430 |
| II | GGGACC | 0.740 | 0.847 | 0.610 | 0.650 | 0.660 | 0.607 | 0.559 | 0.768 | 0.895 | 1.013 | 0.663 | 0.465 | 0.732 | 0.680 | 0.895 | 0.877 | 0.220 | 0.627 | 0.555 | 0.610 | 0.770 | 0.727 | 1.199 | 0.720 | 0.600 | 0.865 |
| II | GCCGGT | 0.528 | 0.900 | 0.672 | 0.864 | 0.480 | 0.429 | 0.329 | 0.592 | 0.840 | 0.910 | 0.513 | 0.810 | 0.716 | 0.680 | 0.895 | 0.737 | 0.687 | 0.738 | 0.692 | 0.575 | 0.765 | 0.625 | 1.206 | 0.660 | 0.510 | 0.575 |
| II | CGACCG | 0.439 | 0.920 | 0.725 | 0.808 | 0.470 | 0.559 | 0.383 | 0.672 | 0.880 | 0.873 | 0.450 | 0.338 | 0.766 | 0.690 | 0.815 | 0.743 | 0.597 | 0.718 | 0.642 | 0.320 | 0.705 | 0.858 | 1.213 | 0.670 | 0.830 | 0.675 |
| II | TCCGGG | 0.656 | 0.903 | 0.918 | 0.962 | 0.650 | 0.319 | 0.490 | 0.513 | 0.995 | 0.917 | 0.680 | 0.615 | 0.686 | 0.940 | 0.925 | 0.713 | 0.800 | 0.792 | 0.620 | 0.565 | 0.645 | 0.562 | 1.227 | 0.440 | 0.300 | 0.565 |
| II | CAGGCG | 0.620 | 0.855 | 0.752 | 0.764 | 0.710 | 0.458 | 0.536 | 0.668 | 0.880 | 0.867 | 0.663 | 0.695 | 0.686 | 0.810 | 0.805 | 0.673 | 0.707 | 0.705 | 0.645 | 0.570 | 0.745 | 0.625 | 1.214 | 0.450 | 0.640 | 0.555 |
| II | CGTTCG | 0.650 | 0.743 | 0.738 | 0.842 | 0.560 | 0.464 | 0.449 | 0.492 | 0.860 | 0.777 | 0.553 | 0.503 | 0.810 | 0.910 | 0.660 | 0.643 | 0.690 | 0.730 | 0.290 | 0.455 | 0.650 | 0.545 | 1.014 | 0.440 | 0.780 | 0.670 |
| II | CGTTCG | 0.607 | 0.917 | 0.750 | 0.836 | 0.690 | 0.672 | 0.543 | 0.648 | 0.890 | 0.873 | 0.450 | 0.547 | 0.648 | 0.690 | 0.830 | 0.643 | 0.667 | 0.608 | 0.818 | 0.540 | 0.820 | 0.725 | 1.213 | 0.510 | 0.860 | 0.450 |
| II | CCCGCT | 0.850 | 1.140 | 0.917 | 1.158 | 0.490 | 0.662 | 0.695 | 0.707 | 1.205 | 1.067 | 0.727 | 0.790 | 0.850 | 1.020 | 1.150 | 0.903 | 0.777 | 0.900 | 0.853 | 0.765 | 0.890 | 0.728 | 1.450 | 0.440 | 0.240 | 0.655 |
| II | CCGACG | 0.496 | 0.907 | 0.777 | 0.872 | 0.790 | 0.393 | 0.272 | 0.507 | 0.965 | 0.870 | 0.450 | 0.508 | 0.812 | 0.810 | 0.885 | 0.783 | 0.543 | 0.693 | 0.425 | 0.345 | 0.645 | 0.723 | 1.237 | 0.300 | 0.660 | 0.650 |
| II | GCCGGG | 0.699 | 1.050 | 0.842 | 1.074 | 0.490 | 0.433 | 0.466 | 0.732 | 1.005 | 0.917 | 0.560 | 0.762 | 0.650 | 0.910 | 1.110 | 0.860 | 0.613 | 0.827 | 0.630 | 0.540 | 0.795 | 0.668 | 1.401 | 0.500 | 0.330 | 0.645 |
| II | GGGTCC | 0.676 | 0.845 | 0.547 | 0.716 | 0.690 | 0.598 | 0.526 | 0.695 | 1.000 | 1.010 | 0.650 | 0.487 | 0.708 | 0.580 | 0.915 | 0.900 | 0.147 | 0.743 | 0.677 | 0.625 | 0.755 | 0.780 | 1.193 | 0.890 | 0.760 | 0.960 |
| II | GCCGGC | 0.801 | 1.038 | 0.795 | 0.990 | 0.340 | 0.278 | 0.446 | 0.670 | 1.085 | 0.997 | 0.563 | 0.665 | 0.646 | 0.910 | 1.100 | 0.833 | 0.640 | 0.785 | 0.573 | 0.645 | 0.670 | 0.617 | 1.398 | 0.280 | 0.520 | 0.755 |
| II | CGGCGA | 0.666 | 0.868 | 0.882 | 0.776 | 0.430 | 0.313 | 0.342 | 0.585 | 0.965 | 0.933 | 0.777 | 0.450 | 0.762 | 0.930 | 0.885 | 0.643 | 0.677 | 0.785 | 0.660 | 0.460 | 0.755 | 0.708 | 1.221 | 0.670 | 0.440 | 0.675 |
| II | TCCCGC | 0.657 | 0.892 | 0.760 | 0.910 | 0.340 | 0.468 | 0.582 | 0.703 | 0.875 | 0.900 | 0.547 | 0.707 | 0.636 | 0.850 | 0.955 | 0.697 | 0.473 | 0.750 | 0.675 | 0.545 | 0.645 | 0.547 | 1.207 | 0.670 | 0.320 | 0.675 |
| II | CCGTCC | 0.623 | 0.868 | 0.762 | 0.854 | 0.690 | 0.377 | 0.401 | 0.537 | 0.875 | 0.853 | 0.457 | 0.388 | 0.778 | 0.910 | 0.810 | 0.717 | 0.697 | 0.705 | 0.448 | 0.345 | 0.600 | 0.708 | 1.213 | 0.440 | 0.640 | 0.670 |
| II | CCGCGT | 0.682 | 0.888 | 0.732 | 0.936 | 0.690 | 0.494 | 0.553 | 0.565 | 1.000 | 0.973 | 0.657 | 0.683 | 0.692 | 0.960 | 0.910 | 0.587 | 0.940 | 0.795 | 0.560 | 0.765 | 0.460 | 0.522 | 1.226 | 0.220 | 0.460 | 0.670 |
| II | CGCGTT | 0.711 | 0.828 | 0.702 | 0.742 | 0.340 | 0.604 | 0.658 | 0.580 | 0.905 | 0.810 | 0.700 | 0.888 | 0.674 | 0.880 | 0.795 | 0.487 | 0.797 | 0.740 | 0.627 | 0.820 | 0.645 | 0.430 | 1.017 | 0.440 | 0.600 | 0.665 |
| II | CGCCGG | 0.669 | 1.048 | 0.797 | 0.974 | 0.570 | 0.272 | 0.336 | 0.648 | 1.100 | 1.070 | 0.590 | 0.583 | 0.762 | 0.970 | 1.030 | 0.830 | 0.723 | 0.792 | 0.642 | 0.460 | 0.780 | 0.765 | 1.444 | 0.520 | 0.420 | 0.670 |
| II | GCGGAG | 0.738 | 0.963 | 0.550 | 0.824 | 0.540 | 0.329 | 0.419 | 0.645 | 0.955 | 0.997 | 0.603 | 0.593 | 0.574 | 0.630 | 0.915 | 0.850 | 0.577 | 0.797 | 0.670 | 0.555 | 0.535 | 0.655 | 1.202 | 0.670 | 0.410 | 0.760 |
| II | AGCGGG | 0.606 | 0.882 | 0.683 | 0.916 | 0.490 | 0.474 | 0.584 | 0.733 | 0.980 | 0.973 | 0.727 | 0.873 | 0.554 | 0.800 | 0.910 | 0.597 | 0.520 | 0.780 | 0.818 | 0.760 | 0.765 | 0.613 | 1.226 | 0.520 | 0.540 | 0.555 |
| II | CGCGGT | 0.710 | 0.930 | 0.805 | 0.812 | 0.570 | 0.302 | 0.391 | 0.635 | 1.005 | 0.997 | 0.660 | 0.643 | 0.700 | 0.910 | 0.880 | 0.737 | 0.733 | 0.840 | 0.443 | 0.600 | 0.565 | 0.525 | 1.227 | 0.450 | 0.560 | 0.800 |
| II | GACGGC | 0.702 | 0.915 | 0.745 | 0.866 | 0.480 | 0.223 | 0.312 | 0.692 | 0.880 | 0.820 | 0.333 | 0.630 | 0.576 | 0.910 | 0.870 | 0.743 | 0.517 | 0.838 | 0.310 | 0.450 | 0.690 | 0.650 | 1.186 | 0.670 | 0.730 | 0.640 |
| II | GCGCCT | 0.623 | 0.863 | 0.607 | 0.798 | 0.770 | 0.313 | 0.490 | 0.703 | 0.925 | 0.923 | 0.803 | 0.775 | 0.680 | 0.850 | 0.895 | 0.687 | 0.513 | 0.820 | 0.667 | 0.680 | 0.650 | 0.638 | 1.204 | 0.660 | 0.770 | 0.750 |
| II | CCGGCC | 0.669 | 1.048 | 0.797 | 0.974 | 0.570 | 0.272 | 0.336 | 0.648 | 1.100 | 1.070 | 0.590 | 0.583 | 0.762 | 0.970 | 1.030 | 0.830 | 0.723 | 0.792 | 0.642 | 0.460 | 0.780 | 0.765 | 1.444 | 0.520 | 0.420 | 0.670 |
| II | GGCGGA | 0.667 | 1.002 | 0.903 | 0.808 | 0.560 | 0.282 | 0.361 | 0.705 | 0.880 | 0.927 | 0.453 | 0.628 | 0.682 | 0.820 | 0.930 | 0.780 | 0.400 | 0.810 | 0.618 | 0.430 | 0.650 | 0.603 | 1.202 | 0.730 | 0.470 | 0.855 |
| II | CCGGAC | 0.617 | 0.953 | 0.570 | 0.912 | 0.670 | 0.584 | 0.499 | 0.598 | 0.850 | 0.800 | 0.227 | 0.610 | 0.644 | 0.740 | 0.910 | 0.907 | 0.583 | 0.725 | 0.670 | 0.545 | 0.765 | 0.693 | 1.217 | 0.720 | 0.320 | 0.755 |
| II | ACGACG | 0.650 | 0.743 | 0.738 | 0.842 | 0.560 | 0.464 | 0.449 | 0.492 | 0.860 | 0.777 | 0.553 | 0.503 | 0.810 | 0.910 | 0.660 | 0.643 | 0.690 | 0.730 | 0.290 | 0.455 | 0.650 | 0.545 | 1.014 | 0.440 | 0.780 | 0.670 |
| II | TCGCGT | 0.747 | 0.733 | 0.775 | 0.922 | 0.480 | 0.524 | 0.629 | 0.572 | 0.795 | 0.877 | 0.617 | 0.765 | 0.698 | 0.760 | 0.805 | 0.523 | 0.883 | 0.685 | 0.450 | 0.650 | 0.575 | 0.347 | 1.017 | 0.450 | 0.530 | 0.575 |
| II | GCCGGC | 0.751 | 1.115 | 0.898 | 1.060 | 0.700 | 0.222 | 0.320 | 0.808 | 0.995 | 1.047 | 0.553 | 0.672 | 0.676 | 0.900 | 1.090 | 0.953 | 0.510 | 0.818 | 0.532 | 0.445 | 0.805 | 0.765 | 1.413 | 0.720 | 0.510 | 0.640 |
| II | CAGCCG | 0.620 | 0.873 | 0.712 | 0.716 | 0.660 | 0.341 | 0.444 | 0.732 | 0.870 | 0.867 | 0.667 | 0.600 | 0.586 | 0.760 | 0.810 | 0.803 | 0.653 | 0.708 | 0.652 | 0.575 | 0.775 | 0.748 | 1.218 | 0.670 | 0.710 | 0.670 |
| II | TCCGGC | 0.679 | 1.020 | 0.837 | 0.974 | 0.560 |       |       |       |       |       |       |       |       |       |       |       |       |       |       |       |       |       |       |       |       |       |

|    |         |       |       |       |       |       |       |       |       |       |       |       |       |       |       |       |       |       |       |       |       |       |       |       |       |       |       |
|----|---------|-------|-------|-------|-------|-------|-------|-------|-------|-------|-------|-------|-------|-------|-------|-------|-------|-------|-------|-------|-------|-------|-------|-------|-------|-------|-------|
| II | GTTCGG  | 0.404 | 0.815 | 0.532 | 0.784 | 0.670 | 0.623 | 0.459 | 0.580 | 0.680 | 0.740 | 0.230 | 0.665 | 0.638 | 0.590 | 0.780 | 0.790 | 0.593 | 0.667 | 0.732 | 0.495 | 0.760 | 0.568 | 1.046 | 0.750 | 0.550 | 0.645 |
| II | GAGCCG  | 0.712 | 0.770 | 0.475 | 0.724 | 0.660 | 0.281 | 0.425 | 0.713 | 1.005 | 0.913 | 0.677 | 0.703 | 0.620 | 0.540 | 0.890 | 0.800 | 0.430 | 0.685 | 0.552 | 0.645 | 0.730 | 0.642 | 1.172 | 0.720 | 0.690 | 0.670 |
| II | GACGTC  | 0.723 | 0.708 | 0.790 | 0.758 | 0.700 | 0.443 | 0.527 | 0.682 | 0.940 | 0.940 | 0.570 | 0.690 | 0.760 | 0.740 | 0.865 | 0.693 | 0.667 | 0.812 | 0.085 | 0.555 | 0.590 | 0.530 | 0.997 | 0.450 | 0.960 | 0.855 |
| II | CGGCAG  | 0.482 | 0.927 | 0.822 | 0.844 | 0.450 | 0.347 | 0.429 | 0.775 | 0.980 | 0.940 | 0.663 | 0.682 | 0.590 | 0.990 | 0.885 | 0.797 | 0.723 | 0.765 | 0.430 | 0.355 | 0.710 | 0.672 | 1.229 | 0.740 | 0.550 | 0.670 |
| II | ACCCGG  | 0.676 | 0.950 | 0.570 | 0.924 | 0.490 | 0.605 | 0.613 | 0.575 | 0.995 | 0.970 | 0.670 | 0.715 | 0.674 | 0.740 | 0.910 | 0.810 | 0.737 | 0.840 | 0.788 | 0.765 | 0.565 | 0.547 | 1.226 | 0.450 | 0.270 | 0.575 |
| II | CCCGAA  | 0.599 | 0.892 | 0.668 | 0.902 | 0.670 | 0.593 | 0.535 | 0.540 | 0.895 | 0.830 | 0.507 | 0.833 | 0.696 | 0.710 | 0.810 | 0.727 | 0.587 | 0.722 | 0.785 | 0.545 | 0.700 | 0.515 | 1.066 | 0.670 | 0.280 | 0.665 |
| II | GCCGTC  | 0.702 | 0.915 | 0.745 | 0.866 | 0.480 | 0.223 | 0.312 | 0.692 | 0.880 | 0.820 | 0.333 | 0.630 | 0.576 | 0.910 | 0.870 | 0.743 | 0.517 | 0.838 | 0.310 | 0.450 | 0.690 | 0.650 | 1.186 | 0.670 | 0.730 | 0.640 |
| II | TCGGGT  | 0.550 | 0.785 | 0.645 | 0.884 | 0.690 | 0.626 | 0.522 | 0.520 | 0.785 | 0.873 | 0.607 | 0.725 | 0.622 | 0.540 | 0.725 | 0.723 | 0.673 | 0.748 | 0.667 | 0.555 | 0.575 | 0.512 | 1.017 | 0.670 | 0.500 | 0.470 |
| II | CGGTCC  | 0.597 | 0.858 | 0.615 | 0.716 | 0.470 | 0.507 | 0.419 | 0.647 | 0.905 | 0.817 | 0.450 | 0.335 | 0.706 | 0.630 | 0.830 | 0.773 | 0.370 | 0.743 | 0.680 | 0.520 | 0.795 | 0.720 | 1.188 | 0.710 | 0.810 | 0.890 |
| II | TCCGCC  | 0.667 | 1.002 | 0.903 | 0.808 | 0.560 | 0.282 | 0.419 | 0.705 | 0.880 | 0.927 | 0.453 | 0.628 | 0.682 | 0.820 | 0.930 | 0.780 | 0.400 | 0.810 | 0.618 | 0.430 | 0.650 | 0.603 | 1.202 | 0.730 | 0.470 | 0.855 |
| II | GTCCGC  | 0.683 | 0.965 | 0.548 | 0.820 | 0.580 | 0.443 | 0.364 | 0.660 | 0.840 | 0.980 | 0.370 | 0.460 | 0.522 | 0.630 | 0.890 | 0.907 | 0.367 | 0.775 | 0.645 | 0.445 | 0.680 | 0.622 | 1.203 | 0.890 | 0.510 | 0.755 |
| II | CTCGCG  | 0.653 | 0.872 | 0.818 | 0.940 | 0.570 | 0.602 | 0.683 | 0.662 | 0.995 | 0.937 | 0.677 | 0.833 | 0.822 | 0.920 | 0.915 | 0.783 | 0.740 | 0.768 | 0.647 | 0.545 | 0.820 | 0.588 | 1.229 | 0.440 | 0.560 | 0.455 |
| II | CGTCGC  | 0.659 | 0.795 | 0.677 | 0.796 | 0.770 | 0.312 | 0.369 | 0.582 | 0.905 | 0.840 | 0.627 | 0.508 | 0.786 | 0.960 | 0.870 | 0.783 | 0.667 | 0.642 | 0.310 | 0.455 | 0.550 | 0.557 | 1.210 | 0.280 | 0.820 | 0.650 |
| II | CGAACCC | 0.400 | 0.785 | 0.510 | 0.586 | 0.700 | 0.702 | 0.369 | 0.607 | 0.795 | 0.790 | 0.447 | 0.668 | 0.700 | 0.640 | 0.770 | 0.760 | 0.517 | 0.603 | 0.722 | 0.625 | 0.670 | 0.555 | 1.028 | 0.720 | 0.800 | 0.780 |
| II | GGCGTC  | 0.809 | 0.900 | 0.723 | 0.744 | 0.700 | 0.263 | 0.440 | 0.815 | 1.000 | 0.997 | 0.547 | 0.698 | 0.716 | 0.900 | 0.850 | 0.833 | 0.453 | 0.823 | 0.305 | 0.550 | 0.655 | 0.530 | 1.181 | 0.670 | 0.810 | 0.845 |
| II | CCGGTC  | 0.643 | 0.818 | 0.628 | 0.816 | 0.510 | 0.598 | 0.496 | 0.665 | 0.880 | 0.793 | 0.450 | 0.497 | 0.736 | 0.590 | 0.925 | 0.730 | 0.573 | 0.755 | 0.632 | 0.735 | 0.800 | 0.698 | 1.176 | 0.670 | 0.550 | 0.760 |
| II | CGACGG  | 0.623 | 0.868 | 0.762 | 0.854 | 0.690 | 0.377 | 0.401 | 0.537 | 0.875 | 0.853 | 0.457 | 0.388 | 0.778 | 0.910 | 0.810 | 0.717 | 0.697 | 0.705 | 0.448 | 0.345 | 0.600 | 0.708 | 1.213 | 0.440 | 0.640 | 0.670 |
| II | TACCGC  | 0.511 | 0.630 | 0.642 | 0.544 | 0.440 | 0.634 | 0.646 | 0.510 | 0.810 | 0.820 | 0.710 | 0.548 | 0.672 | 0.780 | 0.755 | 0.700 | 0.577 | 0.748 | 0.780 | 0.610 | 0.430 | 0.438 | 0.998 | 0.670 | 0.290 | 0.670 |
| II | CCAGGC  | 0.666 | 0.998 | 0.780 | 0.850 | 0.720 | 0.653 | 0.678 | 0.590 | 0.880 | 0.783 | 0.670 | 0.560 | 0.720 | 0.790 | 0.955 | 0.843 | 0.730 | 0.672 | 0.753 | 0.755 | 0.735 | 0.627 | 1.191 | 0.450 | 0.560 | 0.530 |
| II | GACCGG  | 0.643 | 0.818 | 0.628 | 0.816 | 0.510 | 0.598 | 0.496 | 0.665 | 0.880 | 0.793 | 0.450 | 0.497 | 0.736 | 0.590 | 0.925 | 0.730 | 0.573 | 0.755 | 0.632 | 0.735 | 0.800 | 0.698 | 1.176 | 0.670 | 0.550 | 0.760 |
| II | TGACGG  | 0.593 | 0.848 | 0.747 | 0.866 | 0.470 | 0.265 | 0.388 | 0.610 | 0.665 | 0.630 | 0.453 | 0.335 | 0.774 | 0.940 | 0.600 | 0.610 | 0.577 | 0.777 | 0.228 | 0.335 | 0.485 | 0.507 | 1.017 | 0.670 | 0.520 | 0.770 |
| II | ACCGTC  | 0.521 | 0.725 | 0.588 | 0.728 | 0.250 | 0.437 | 0.325 | 0.528 | 0.790 | 0.813 | 0.380 | 0.728 | 0.694 | 0.780 | 0.670 | 0.603 | 0.687 | 0.733 | 0.468 | 0.570 | 0.775 | 0.690 | 1.002 | 0.670 | 0.740 | 0.575 |
| II | TAGCCC  | 0.678 | 0.638 | 0.692 | 0.562 | 0.560 | 0.629 | 0.673 | 0.597 | 0.830 | 0.860 | 0.770 | 0.465 | 0.588 | 0.490 | 0.760 | 0.783 | 0.447 | 0.693 | 0.840 | 0.640 | 0.655 | 0.778 | 0.981 | 1.110 | 0.580 | 0.525 |
| II | GGCCGA  | 0.824 | 1.000 | 0.805 | 0.812 | 0.660 | 0.363 | 0.508 | 0.827 | 1.015 | 1.017 | 0.550 | 0.685 | 0.662 | 0.870 | 0.925 | 0.893 | 0.290 | 0.787 | 0.615 | 0.560 | 0.660 | 0.585 | 1.202 | 0.710 | 0.680 | 0.850 |
| II | CACCGG  | 0.551 | 0.903 | 0.778 | 0.898 | 0.470 | 0.478 | 0.390 | 0.655 | 0.980 | 0.857 | 0.647 | 0.385 | 0.606 | 0.810 | 0.915 | 0.683 | 0.790 | 0.820 | 0.792 | 0.680 | 0.720 | 0.715 | 1.221 | 0.450 | 0.420 | 0.780 |
| II | CGGCAC  | 0.644 | 0.885 | 0.690 | 0.852 | 0.450 | 0.290 | 0.376 | 0.775 | 0.905 | 0.893 | 0.453 | 0.690 | 0.570 | 0.760 | 0.890 | 0.850 | 0.500 | 0.777 | 0.330 | 0.415 | 0.535 | 0.497 | 1.218 | 0.720 | 0.540 | 0.890 |
| II | AAACCCG | 0.630 | 0.833 | 0.633 | 0.628 | 0.570 | 0.642 | 0.656 | 0.452 | 0.795 | 0.817 | 0.867 | 0.752 | 0.706 | 0.720 | 0.710 | 0.697 | 0.577 | 0.747 | 0.708 | 0.700 | 0.650 | 0.420 | 1.016 | 0.670 | 0.410 | 0.685 |
| II | ACGGCA  | 0.711 | 0.728 | 0.717 | 0.856 | 0.260 | 0.407 | 0.463 | 0.700 | 0.865 | 0.950 | 0.293 | 0.652 | 0.582 | 0.910 | 0.845 | 0.610 | 0.687 | 0.818 | 0.228 | 0.445 | 0.625 | 0.407 | 1.018 | 0.670 | 0.510 | 0.795 |
| II | CGGAGG  | 0.510 | 0.873 | 0.712 | 0.690 | 0.650 | 0.417 | 0.421 | 0.440 | 0.995 | 0.980 | 0.450 | 0.673 | 0.752 | 0.760 | 0.935 | 0.730 | 0.690 | 0.593 | 0.653 | 0.580 | 0.650 | 0.735 | 1.236 | 0.520 | 0.480 | 0.645 |
| II | GGACCG  | 0.597 | 0.858 | 0.615 | 0.716 | 0.470 | 0.507 | 0.419 | 0.647 | 0.905 | 0.817 | 0.450 | 0.335 | 0.706 | 0.630 | 0.830 | 0.773 | 0.370 | 0.743 | 0.680 | 0.520 | 0.795 | 0.720 | 1.188 | 0.710 | 0.810 | 0.890 |
| II | TCCGCC  | 0.613 | 0.940 | 0.870 | 0.810 | 0.570 | 0.290 | 0.224 | 0.653 | 0.960 | 0.930 | 0.600 | 0.452 | 0.698 | 0.770 | 0.885 | 0.750 | 0.520 | 0.785 | 0.630 | 0.445 | 0.695 | 0.675 | 1.220 | 0.670 | 0.510 | 0.670 |
| II | CGCGTA  | 0.633 | 0.747 | 0.683 | 0.630 | 0.570 | 0.632 | 0.604 | 0.535 | 0.900 | 0.820 | 0.493 | 0.663 | 0.700 | 0.920 | 0.690 | 0.660 | 0.650 | 0.688 | 0.562 | 0.705 | 0.425 | 0.335 | 1.000 | 0.450 | 0.470 | 0.665 |
| II | CTCCGC  | 0.738 | 0.963 | 0.550 | 0.824 | 0.540 | 0.329 | 0.418 | 0.645 | 0.955 | 0.997 | 0.603 | 0.593 | 0.574 | 0.630 | 0.915 | 0.850 | 0.577 | 0.797 | 0.670 | 0.555 | 0.535 | 0.655 | 1.202 | 0.670 | 0.410 | 0.760 |
| II | GACACG  | 0.703 | 0.585 | 0.515 | 0.754 | 0.790 | 0.664 | 0.644 | 0.678 | 0.865 | 0.803 | 0.670 | 0.610 | 0.664 | 0.780 | 0.860 | 0.677 | 0.577 | 0.670 | 0.465 | 0.830 | 0.425 | 0.278 | 0.997 | 0.280 | 0.730 | 0.860 |
| II | GCCGCC  | 0.677 | 1.085 | 0.853 | 0.964 | 0.560 | 0.060 | 0.225 | 0.773 | 1.005 | 1.043 | 0.557 | 0.690 | 0.672 | 0.910 | 1.075 | 0.883 | 0.483 | 0.853 | 0.477 | 0.450 | 0.690 | 0.747 | 1.409 | 0.500 | 0.700 | 0.750 |
| II | CGGACG  | 0.592 | 0.873 | 0.707 | 0.688 | 0.690 | 0.556 | 0.446 | 0.573 | 0.985 | 0.993 | 0.220 | 0.545 | 0.724 | 0.760 | 0.915 | 0.760 | 0.587 | 0.617 | 0.430 | 0.425 | 0.755 | 0.682 | 1.236 | 0.520 | 0.630 | 0.775 |
| II | CGGCTC  | 0.712 | 0.770 | 0.475 | 0.724 | 0.660 | 0.281 | 0.425 | 0.713 | 1.005 | 0.913 | 0.677 | 0.703 | 0.620 | 0.540 | 0.890 | 0.800 | 0.430 | 0.685 | 0.552 | 0.645 | 0.730 | 0.642 | 1.172 | 0.720 | 0.690 | 0.670 |
| II | GGCACG  | 0.609 | 0.807 | 0.675 | 0.776 | 0.710 | 0.581 | 0.615 | 0.592 | 0.865 | 0.927 | 0.450 | 0.613 | 0.600 | 0.860 | 0.910 | 0.810 | 0.493 | 0.705 | 0.480 | 0.815 | 0.560 | 0.425 | 1.208 | 0.270 | 0.820 | 0.775 |
| II | GCTGGC  | 0.704 | 0.818 | 0.652 | 0.774 | 0.560 | 0.329 | 0.467 | 0.593 | 0.915 | 0.937 | 0.670 | 0.672 | 0.520 | 0.760 | 0.900 | 0.913 | 0.593 | 0.675 | 0.605 | 0.725 | 0.565 | 0.455 | 1.202 | 0.500 | 0.650 | 0.650 |
| II | GACGCC  | 0.809 | 0.900 | 0.723 | 0.744 | 0.700 | 0.263 | 0.440 | 0.815 | 1.000 | 0.997 | 0.547 | 0.698 | 0.716 | 0.900 | 0.850 | 0.833 | 0.453 | 0.823 | 0.305 | 0.550 | 0.655 | 0.530 | 1.181 | 0.670 | 0.810 | 0.845 |
| II | ATCGCG  | 0.766 | 0.698 | 0.635 | 0.768 | 0.340 | 0.491 | 0.595 | 0.673 | 0.785 | 0.770 | 0.747 | 0.833 | 0.698 | 0.720 | 0.695 | 0.683 | 0.860 | 0.740 | 0.515 | 0.590 | 0.680 | 0.402 | 1.010 | 0.670 | 0.440 | 0.670 |
| II | CCGGGA  | 0.668 | 0.887 | 0.790 | 0.932 | 0.490 | 0.489 | 0.579 | 0.627 | 1.000 | 0.917 | 0.603 | 0.658 | 0.792 | 0.960 | 0.950 | 0.697 | 0.690 | 0.805 | 0.675 | 0.550 | 0.660 | 0.650 | 1.227 | 0.670 | 0.110 | 0.755 |
| II | TACGGC  | 0.647 | 0.835 | 0.717 | 0.824 | 0.340 | 0.387 | 0.530 | 0.537 | 0.925 | 0.703 | 0.113 | 0.768 | 0.598 | 0.710 | 0.750 | 0.680 | 0.663 | 0.805 | 0.400 | 0.565 | 0.605 | 0.507 | 0.989 | 0.670 | 0.500 | 0.635 |
| II | ACCGGT  | 0.681 | 0.900 | 0.693 | 0.876 | 0.440 | 0.645 | 0.551 | 0.667 | 0.880 | 0.813 | 0.603 | 0.998 | 0.746 | 0.740 | 0.795 | 0.623 | 0.887 | 0.755 | 0.838 | 0.790 | 0.760 | 0.657 | 1.043 | 0.670 | 0.520 | 0.690 |
| II | GGCTCG  | 0.620 | 0.858 | 0.600 | 0.760 | 0.790 | 0.    |       |       |       |       |       |       |       |       |       |       |       |       |       |       |       |       |       |       |       |       |

|    |        |       |       |       |       |       |       |       |       |       |       |       |       |       |       |       |       |       |       |       |       |       |       |       |       |       |       |
|----|--------|-------|-------|-------|-------|-------|-------|-------|-------|-------|-------|-------|-------|-------|-------|-------|-------|-------|-------|-------|-------|-------|-------|-------|-------|-------|-------|
| II | CCCGAC | 0.526 | 0.993 | 0.713 | 1.000 | 0.700 | 0.463 | 0.317 | 0.603 | 0.860 | 0.797 | 0.450 | 0.615 | 0.632 | 0.790 | 0.890 | 0.827 | 0.510 | 0.748 | 0.580 | 0.315 | 0.680 | 0.648 | 1.217 | 0.670 | 0.540 | 0.645 |
| II | CCCGCC | 0.558 | 1.042 | 0.898 | 0.934 | 0.560 | 0.283 | 0.370 | 0.740 | 1.015 | 0.947 | 0.657 | 0.835 | 0.714 | 1.020 | 1.055 | 0.793 | 0.390 | 0.777 | 0.625 | 0.540 | 0.800 | 0.555 | 1.397 | 0.520 | 0.540 | 0.670 |
| II | CGGTCG | 0.439 | 0.920 | 0.725 | 0.808 | 0.470 | 0.559 | 0.383 | 0.672 | 0.880 | 0.873 | 0.450 | 0.338 | 0.766 | 0.690 | 0.815 | 0.743 | 0.597 | 0.718 | 0.642 | 0.320 | 0.705 | 0.858 | 1.213 | 0.670 | 0.830 | 0.675 |
| II | GGTCGC | 0.539 | 0.878 | 0.678 | 0.758 | 0.680 | 0.473 | 0.385 | 0.792 | 0.790 | 0.837 | 0.623 | 0.465 | 0.690 | 0.740 | 0.910 | 0.887 | 0.447 | 0.705 | 0.532 | 0.415 | 0.560 | 0.725 | 1.199 | 0.500 | 0.790 | 0.680 |
| II | CCCGAG | 0.709 | 0.953 | 0.715 | 1.030 | 0.490 | 0.673 | 0.538 | 0.573 | 1.005 | 0.930 | 0.677 | 0.750 | 0.790 | 0.800 | 0.925 | 0.873 | 0.730 | 0.808 | 0.805 | 0.545 | 0.860 | 0.720 | 1.228 | 0.440 | 0.440 | 0.450 |
| II | AGGGCC | 0.719 | 0.852 | 0.668 | 0.786 | 0.720 | 0.487 | 0.551 | 0.682 | 0.860 | 1.000 | 0.590 | 0.642 | 0.666 | 0.640 | 0.930 | 0.760 | 0.297 | 0.835 | 0.680 | 0.785 | 0.905 | 0.763 | 1.206 | 0.720 | 0.850 | 0.850 |
| II | GCGGAC | 0.760 | 0.850 | 0.703 | 0.824 | 0.640 | 0.280 | 0.315 | 0.803 | 0.850 | 1.017 | 0.690 | 0.495 | 0.688 | 0.800 | 0.870 | 0.893 | 0.447 | 0.835 | 0.505 | 0.330 | 0.670 | 0.667 | 1.203 | 0.720 | 0.680 | 0.780 |
| II | CGCGGA | 0.744 | 0.935 | 0.858 | 0.808 | 0.340 | 0.500 | 0.425 | 0.615 | 0.990 | 0.930 | 0.517 | 0.500 | 0.648 | 0.820 | 0.910 | 0.723 | 0.617 | 0.752 | 0.682 | 0.570 | 0.650 | 0.490 | 1.222 | 0.510 | 0.280 | 0.775 |
| II | TTCCGG | 0.688 | 0.848 | 0.563 | 0.834 | 0.450 | 0.423 | 0.587 | 0.617 | 0.890 | 0.830 | 0.413 | 0.748 | 0.730 | 0.740 | 0.815 | 0.777 | 0.720 | 0.708 | 0.667 | 0.460 | 0.755 | 0.467 | 1.066 | 0.890 | 0.060 | 0.770 |
| II | GCAGCG | 0.656 | 0.872 | 0.723 | 0.860 | 0.570 | 0.333 | 0.399 | 0.728 | 0.995 | 0.837 | 0.670 | 0.500 | 0.468 | 0.690 | 0.885 | 0.693 | 0.673 | 0.693 | 0.610 | 0.830 | 0.610 | 0.672 | 1.193 | 0.500 | 0.740 | 0.670 |
| II | ATCCGG | 0.682 | 0.750 | 0.348 | 0.744 | 0.670 | 0.582 | 0.613 | 0.630 | 0.800 | 0.770 | 0.447 | 0.748 | 0.714 | 0.520 | 0.715 | 0.773 | 0.807 | 0.730 | 0.728 | 0.650 | 0.580 | 0.625 | 1.010 | 0.660 | 0.140 | 0.670 |
| II | ACGCGA | 0.747 | 0.733 | 0.775 | 0.922 | 0.480 | 0.524 | 0.629 | 0.572 | 0.795 | 0.877 | 0.617 | 0.765 | 0.698 | 0.760 | 0.805 | 0.523 | 0.883 | 0.685 | 0.450 | 0.650 | 0.575 | 0.347 | 1.017 | 0.450 | 0.520 | 0.575 |
| II | GCGGCG | 0.677 | 1.087 | 0.853 | 0.964 | 0.560 | 0.060 | 0.225 | 0.773 | 1.005 | 1.043 | 0.557 | 0.690 | 0.672 | 0.910 | 1.075 | 0.883 | 0.483 | 0.853 | 0.477 | 0.450 | 0.690 | 0.747 | 1.409 | 0.500 | 0.700 | 0.750 |
| II | GTCCGC | 0.577 | 1.005 | 0.693 | 0.886 | 0.700 | 0.242 | 0.165 | 0.673 | 0.840 | 0.977 | 0.513 | 0.490 | 0.578 | 0.680 | 0.870 | 0.897 | 0.290 | 0.825 | 0.473 | 0.225 | 0.660 | 0.825 | 1.204 | 0.720 | 0.730 | 0.680 |
| II | GACGGT | 0.521 | 0.725 | 0.588 | 0.728 | 0.250 | 0.437 | 0.325 | 0.528 | 0.790 | 0.813 | 0.380 | 0.728 | 0.694 | 0.780 | 0.670 | 0.603 | 0.687 | 0.733 | 0.468 | 0.570 | 0.775 | 0.690 | 1.002 | 0.670 | 0.740 | 0.575 |
| II | GGACGG | 0.566 | 0.860 | 0.712 | 0.778 | 0.690 | 0.447 | 0.384 | 0.605 | 0.895 | 0.810 | 0.227 | 0.537 | 0.690 | 0.810 | 0.835 | 0.700 | 0.523 | 0.743 | 0.453 | 0.450 | 0.600 | 0.667 | 1.189 | 0.660 | 0.780 | 0.755 |
| II | TGCGCG | 0.702 | 1.010 | 0.813 | 0.950 | 0.560 | 0.223 | 0.446 | 0.732 | 1.005 | 0.917 | 0.337 | 0.835 | 0.648 | 0.880 | 0.915 | 0.840 | 0.447 | 0.815 | 0.562 | 0.565 | 0.570 | 0.590 | 1.210 | 0.490 | 0.490 | 0.740 |
| II | GTCGCG | 0.671 | 0.778 | 0.475 | 0.692 | 0.650 | 0.376 | 0.421 | 0.608 | 0.915 | 0.937 | 0.663 | 0.667 | 0.604 | 0.540 | 0.920 | 0.837 | 0.577 | 0.620 | 0.665 | 0.590 | 0.565 | 0.568 | 1.200 | 0.500 | 0.470 | 0.650 |
| II | CGCGAA | 0.704 | 0.792 | 0.755 | 0.788 | 0.450 | 0.535 | 0.600 | 0.662 | 0.855 | 0.840 | 0.683 | 0.665 | 0.688 | 0.720 | 0.880 | 0.677 | 0.690 | 0.685 | 0.710 | 0.475 | 0.585 | 0.505 | 1.063 | 0.670 | 0.320 | 0.670 |
| II | CCCGAT | 0.689 | 0.787 | 0.502 | 0.818 | 0.490 | 0.608 | 0.535 | 0.670 | 0.775 | 0.767 | 0.670 | 0.840 | 0.706 | 0.570 | 0.690 | 0.637 | 0.730 | 0.733 | 0.720 | 0.540 | 0.690 | 0.628 | 1.010 | 0.660 | 0.360 | 0.565 |
| II | GCGTGG | 0.576 | 0.970 | 0.733 | 0.892 | 0.770 | 0.519 | 0.548 | 0.603 | 0.895 | 0.783 | 0.653 | 0.388 | 0.650 | 1.000 | 0.925 | 0.690 | 0.653 | 0.765 | 0.560 | 0.665 | 0.515 | 0.398 | 1.194 | 0.220 | 0.670 | 0.645 |
| II | AGGCGG | 0.671 | 0.897 | 0.727 | 0.778 | 0.690 | 0.435 | 0.422 | 0.650 | 1.015 | 0.997 | 0.657 | 0.560 | 0.732 | 0.690 | 0.910 | 0.737 | 0.513 | 0.802 | 0.520 | 0.595 | 0.700 | 0.657 | 1.227 | 0.670 | 0.710 | 0.780 |
| II | ACCGCG | 0.526 | 0.865 | 0.548 | 0.816 | 0.550 | 0.428 | 0.478 | 0.592 | 0.925 | 0.927 | 0.723 | 0.762 | 0.648 | 0.630 | 0.925 | 0.840 | 0.513 | 0.750 | 0.802 | 0.760 | 0.645 | 0.432 | 1.204 | 0.660 | 0.470 | 0.470 |
| II | GCCGTA | 0.647 | 0.835 | 0.717 | 0.824 | 0.340 | 0.387 | 0.530 | 0.537 | 0.925 | 0.703 | 0.113 | 0.768 | 0.600 | 0.710 | 0.750 | 0.680 | 0.663 | 0.805 | 0.400 | 0.565 | 0.605 | 0.507 | 0.989 | 0.670 | 0.500 | 0.635 |
| II | TTCCGG | 0.704 | 0.792 | 0.755 | 0.788 | 0.450 | 0.535 | 0.600 | 0.662 | 0.855 | 0.840 | 0.683 | 0.665 | 0.688 | 0.720 | 0.880 | 0.677 | 0.690 | 0.685 | 0.710 | 0.475 | 0.585 | 0.505 | 1.063 | 0.670 | 0.320 | 0.670 |
| II | CTGACG | 0.503 | 0.848 | 0.797 | 0.862 | 0.670 | 0.496 | 0.474 | 0.582 | 0.755 | 0.777 | 0.450 | 0.460 | 0.720 | 0.840 | 0.680 | 0.643 | 0.690 | 0.762 | 0.207 | 0.340 | 0.635 | 0.552 | 1.042 | 0.520 | 0.770 | 0.665 |
| II | GCGACG | 0.659 | 0.795 | 0.677 | 0.796 | 0.770 | 0.312 | 0.369 | 0.582 | 0.905 | 0.840 | 0.627 | 0.508 | 0.786 | 0.960 | 0.870 | 0.783 | 0.667 | 0.642 | 0.310 | 0.455 | 0.550 | 0.557 | 1.210 | 0.280 | 0.820 | 0.650 |
| II | GACGGG | 0.661 | 0.830 | 0.742 | 0.902 | 0.480 | 0.446 | 0.464 | 0.617 | 0.875 | 0.797 | 0.503 | 0.698 | 0.702 | 0.810 | 0.905 | 0.637 | 0.577 | 0.747 | 0.402 | 0.540 | 0.685 | 0.535 | 1.177 | 0.440 | 0.550 | 0.645 |
| II | GTGGCG | 0.644 | 0.862 | 0.783 | 0.950 | 0.670 | 0.273 | 0.385 | 0.770 | 0.910 | 0.890 | 0.670 | 0.670 | 0.668 | 0.750 | 0.890 | 0.750 | 0.443 | 0.800 | 0.325 | 0.435 | 0.535 | 0.383 | 1.218 | 0.720 | 0.730 | 0.665 |
| II | AAGGCG | 0.663 | 0.737 | 0.717 | 0.758 | 0.570 | 0.400 | 0.505 | 0.623 | 0.915 | 0.807 | 0.673 | 0.800 | 0.684 | 0.870 | 0.825 | 0.460 | 0.727 | 0.700 | 0.512 | 0.660 | 0.645 | 0.500 | 1.016 | 0.670 | 0.780 | 0.665 |
| II | CGAGCC | 0.620 | 0.858 | 0.600 | 0.760 | 0.790 | 0.592 | 0.530 | 0.735 | 0.905 | 0.877 | 0.670 | 0.695 | 0.692 | 0.640 | 0.825 | 0.857 | 0.443 | 0.605 | 0.680 | 0.620 | 0.760 | 0.595 | 1.190 | 0.490 | 0.870 | 0.560 |
| II | GGTCGG | 0.384 | 0.820 | 0.615 | 0.832 | 0.730 | 0.463 | 0.237 | 0.610 | 0.800 | 0.820 | 0.457 | 0.462 | 0.760 | 0.590 | 0.885 | 0.867 | 0.370 | 0.740 | 0.642 | 0.305 | 0.645 | 0.770 | 1.201 | 0.520 | 0.780 | 0.650 |
| II | GTGGCC | 0.712 | 0.855 | 0.747 | 0.820 | 0.680 | 0.481 | 0.486 | 0.830 | 0.845 | 1.027 | 0.743 | 0.443 | 0.610 | 0.750 | 0.895 | 0.890 | 0.227 | 0.825 | 0.555 | 0.535 | 0.675 | 0.610 | 1.203 | 0.940 | 0.830 | 0.735 |
| II | AGCGGC | 0.664 | 0.870 | 0.635 | 0.874 | 0.520 | 0.276 | 0.369 | 0.742 | 0.850 | 0.913 | 0.560 | 0.860 | 0.574 | 0.690 | 0.885 | 0.667 | 0.670 | 0.823 | 0.635 | 0.665 | 0.765 | 0.800 | 1.204 | 0.500 | 0.700 | 0.740 |
| II | AAACCG | 0.571 | 0.680 | 0.560 | 0.628 | 0.430 | 0.640 | 0.560 | 0.442 | 0.755 | 0.747 | 0.670 | 0.530 | 0.704 | 0.650 | 0.690 | 0.537 | 0.797 | 0.808 | 0.745 | 0.625 | 0.570 | 0.610 | 0.824 | 0.890 | 0.600 | 0.890 |
| II | TTCGGG | 0.599 | 0.892 | 0.668 | 0.902 | 0.670 | 0.593 | 0.535 | 0.540 | 0.895 | 0.830 | 0.507 | 0.833 | 0.696 | 0.710 | 0.810 | 0.727 | 0.587 | 0.722 | 0.785 | 0.545 | 0.700 | 0.515 | 1.066 | 0.670 | 0.280 | 0.665 |
| II | GCGGGT | 0.496 | 0.895 | 0.763 | 0.788 | 0.330 | 0.273 | 0.237 | 0.540 | 0.850 | 1.003 | 0.463 | 0.810 | 0.654 | 0.830 | 0.890 | 0.773 | 0.540 | 0.843 | 0.670 | 0.570 | 0.825 | 0.698 | 1.207 | 0.670 | 0.700 | 0.690 |
| II | CCGCCA | 0.528 | 0.900 | 0.915 | 0.924 | 0.690 | 0.102 | 0.301 | 0.663 | 0.885 | 0.850 | 0.603 | 0.560 | 0.710 | 0.880 | 0.835 | 0.663 | 0.580 | 0.808 | 0.450 | 0.340 | 0.650 | 0.507 | 1.226 | 0.670 | 0.480 | 0.565 |
| II | TGGCGG | 0.528 | 0.900 | 0.915 | 0.924 | 0.690 | 0.102 | 0.301 | 0.663 | 0.885 | 0.850 | 0.603 | 0.560 | 0.710 | 0.880 | 0.835 | 0.663 | 0.580 | 0.808 | 0.450 | 0.340 | 0.650 | 0.507 | 1.226 | 0.670 | 0.480 | 0.565 |
| II | CCGGAG | 0.682 | 0.955 | 0.575 | 0.942 | 0.670 | 0.478 | 0.505 | 0.603 | 1.005 | 0.930 | 0.453 | 0.610 | 0.770 | 0.740 | 0.945 | 0.853 | 0.803 | 0.792 | 0.800 | 0.545 | 0.705 | 0.695 | 1.228 | 0.670 | 0.220 | 0.670 |
| II | CCGACC | 0.384 | 0.820 | 0.615 | 0.832 | 0.730 | 0.463 | 0.237 | 0.610 | 0.800 | 0.820 | 0.457 | 0.462 | 0.760 | 0.590 | 0.885 | 0.867 | 0.370 | 0.740 | 0.642 | 0.305 | 0.645 | 0.770 | 1.201 | 0.520 | 0.780 | 0.650 |
| II | CCGGCT | 0.624 | 0.860 | 0.575 | 0.866 | 0.700 | 0.378 | 0.409 | 0.670 | 0.980 | 0.970 | 0.623 | 0.713 | 0.662 | 0.740 | 0.885 | 0.720 | 0.720 | 0.770 | 0.677 | 0.560 | 0.650 | 0.720 | 1.226 | 0.670 | 0.370 | 0.575 |
| II | AACTGT | 0.656 | 0.698 | 0.587 | 0.754 | 0.690 | 0.830 | 0.735 | 0.513 | 0.870 | 0.707 | 0.690 | 0.663 | 0.618 | 0.690 | 0.675 | 0.563 | 0.883 | 0.753 | 0.388 | 0.845 | 0.365 | 0.213 | 0.851 | 0.220 | 0.710 | 0.685 |
| II | CAGCGG | 0.644 | 0.910 | 0.817 | 0.902 | 0.690 | 0.402 | 0.454 | 0.712 | 0.970 | 0.857 | 0.683 | 0.435 | 0.450 | 0.820 | 0.910 | 0.583 | 0.867 | 0.708 | 0.795 | 0.685 | 0.780 | 0.800 | 1.221 | 0.670 | 0.610 | 0.565 |
| II | GCCGAG | 0.740 | 0.950 | 0.695 | 0.892 | 0.480 |       |       |       |       |       |       |       |       |       |       |       |       |       |       |       |       |       |       |       |       |       |



|     |        |       |       |       |       |       |       |       |       |       |       |       |       |       |       |       |       |       |       |       |       |       |       |       |       |       |       |
|-----|--------|-------|-------|-------|-------|-------|-------|-------|-------|-------|-------|-------|-------|-------|-------|-------|-------|-------|-------|-------|-------|-------|-------|-------|-------|-------|-------|
| II  | CCGTCA | 0.593 | 0.848 | 0.747 | 0.866 | 0.470 | 0.265 | 0.388 | 0.610 | 0.665 | 0.630 | 0.453 | 0.338 | 0.774 | 0.940 | 0.600 | 0.610 | 0.577 | 0.777 | 0.228 | 0.335 | 0.485 | 0.507 | 1.017 | 0.670 | 0.520 | 0.770 |
| II  | CCCGTT | 0.662 | 0.823 | 0.688 | 0.828 | 0.440 | 0.658 | 0.654 | 0.578 | 0.860 | 0.767 | 0.507 | 0.777 | 0.702 | 0.800 | 0.800 | 0.440 | 0.727 | 0.772 | 0.630 | 0.760 | 0.755 | 0.605 | 1.016 | 0.440 | 0.560 | 0.560 |
| III | GCCCGG | 0.714 | 1.045 | 0.782 | 1.018 | 0.710 | 0.497 | 0.533 | 0.788 | 1.000 | 0.913 | 0.447 | 0.655 | 0.654 | 0.810 | 1.130 | 0.880 | 0.507 | 0.797 | 0.755 | 0.740 | 0.685 | 0.680 | 1.399 | 0.500 | 0.380 | 0.610 |
| III | TAACCG | 0.494 | 0.658 | 0.638 | 0.542 | 0.210 | 0.613 | 0.543 | 0.443 | 0.655 | 0.597 | 0.673 | 0.325 | 0.678 | 0.780 | 0.525 | 0.587 | 0.800 | 0.690 | 0.677 | 0.590 | 0.650 | 0.625 | 0.796 | 0.890 | 0.470 | 0.670 |
| III | GAGGCC | 0.748 | 0.867 | 0.688 | 0.716 | 0.810 | 0.466 | 0.576 | 0.760 | 1.000 | 0.993 | 0.710 | 0.667 | 0.688 | 0.730 | 0.880 | 0.817 | 0.310 | 0.708 | 0.517 | 0.760 | 0.710 | 0.760 | 1.179 | 0.890 | 0.950 | 0.735 |
| III | AAGGGC | 0.663 | 0.673 | 0.618 | 0.836 | 0.660 | 0.652 | 0.672 | 0.630 | 0.840 | 0.683 | 0.533 | 0.742 | 0.618 | 0.690 | 0.810 | 0.487 | 0.520 | 0.748 | 0.695 | 0.880 | 0.845 | 0.753 | 1.009 | 0.660 | 0.830 | 0.525 |
| III | CCCATT | 0.629 | 0.645 | 0.732 | 0.628 | 0.660 | 0.747 | 0.698 | 0.678 | 0.645 | 0.543 | 0.727 | 0.802 | 0.690 | 0.780 | 0.600 | 0.517 | 0.520 | 0.812 | 0.788 | 0.790 | 0.680 | 0.608 | 0.796 | 0.520 | 0.780 | 0.565 |
| III | GGTCCA | 0.739 | 0.762 | 0.610 | 0.688 | 0.470 | 0.683 | 0.568 | 0.740 | 0.780 | 0.950 | 0.637 | 0.238 | 0.636 | 0.430 | 0.865 | 0.827 | 0.147 | 0.652 | 0.737 | 0.500 | 0.555 | 0.765 | 0.999 | 0.930 | 0.830 | 0.850 |
| III | AGTGGG | 0.466 | 0.843 | 0.825 | 0.858 | 0.710 | 0.635 | 0.484 | 0.603 | 0.780 | 0.770 | 0.677 | 0.705 | 0.514 | 0.920 | 0.720 | 0.643 | 0.300 | 0.805 | 0.770 | 0.575 | 0.650 | 0.640 | 1.014 | 0.300 | 0.760 | 0.665 |
| III | AACGAC | 0.440 | 0.705 | 0.602 | 0.744 | 0.660 | 0.638 | 0.393 | 0.523 | 0.630 | 0.547 | 0.470 | 0.665 | 0.734 | 0.580 | 0.555 | 0.533 | 0.667 | 0.725 | 0.465 | 0.455 | 0.660 | 0.642 | 0.798 | 0.670 | 0.860 | 0.745 |
| III | TATCGG | 0.603 | 0.468 | 0.528 | 0.510 | 0.490 | 0.497 | 0.462 | 0.652 | 0.695 | 0.600 | 0.630 | 0.605 | 0.710 | 0.610 | 0.625 | 0.653 | 0.590 | 0.747 | 0.675 | 0.335 | 0.645 | 0.660 | 0.837 | 0.730 | 0.490 | 0.565 |
| III | CCGAAT | 0.597 | 0.718 | 0.463 | 0.656 | 0.670 | 0.612 | 0.507 | 0.638 | 0.665 | 0.697 | 0.450 | 0.760 | 0.794 | 0.700 | 0.565 | 0.790 | 0.743 | 0.810 | 0.715 | 0.545 | 0.575 | 0.532 | 0.828 | 0.660 | 0.370 | 0.670 |
| III | AAAGCC | 0.768 | 0.647 | 0.597 | 0.620 | 0.780 | 0.677 | 0.660 | 0.670 | 0.780 | 0.767 | 0.707 | 0.790 | 0.710 | 0.600 | 0.710 | 0.540 | 0.670 | 0.760 | 0.692 | 0.890 | 0.750 | 0.672 | 0.822 | 0.890 | 0.670 | 0.735 |
| III | TCCGAA | 0.611 | 0.855 | 0.733 | 0.934 | 0.700 | 0.629 | 0.535 | 0.575 | 0.820 | 0.707 | 0.313 | 0.835 | 0.744 | 0.600 | 0.610 | 0.863 | 0.617 | 0.815 | 0.793 | 0.455 | 0.760 | 0.590 | 0.941 | 0.890 | 0.310 | 0.775 |
| III | GGGGTC | 0.686 | 0.847 | 0.627 | 0.698 | 0.580 | 0.479 | 0.536 | 0.735 | 1.000 | 1.010 | 0.713 | 0.637 | 0.734 | 0.680 | 0.875 | 0.843 | 0.230 | 0.823 | 0.527 | 0.715 | 0.655 | 0.682 | 1.181 | 0.720 | 0.620 | 0.850 |
| III | TCCGAC | 0.557 | 0.923 | 0.777 | 0.934 | 0.700 | 0.462 | 0.315 | 0.570 | 0.770 | 0.857 | 0.423 | 0.613 | 0.736 | 0.590 | 0.750 | 0.860 | 0.480 | 0.762 | 0.620 | 0.235 | 0.645 | 0.690 | 1.063 | 0.890 | 0.520 | 0.780 |
| III | ATTCGG | 0.597 | 0.718 | 0.463 | 0.656 | 0.670 | 0.612 | 0.507 | 0.638 | 0.665 | 0.697 | 0.450 | 0.760 | 0.794 | 0.700 | 0.565 | 0.790 | 0.743 | 0.810 | 0.715 | 0.545 | 0.575 | 0.532 | 0.828 | 0.660 | 0.370 | 0.670 |
| III | CCAACG | 0.351 | 0.868 | 0.835 | 0.834 | 0.650 | 0.614 | 0.428 | 0.508 | 0.760 | 0.653 | 0.453 | 0.307 | 0.684 | 0.910 | 0.805 | 0.640 | 0.557 | 0.728 | 0.598 | 0.540 | 0.645 | 0.720 | 1.048 | 0.300 | 0.870 | 0.560 |
| III | GGCTTT | 0.768 | 0.647 | 0.597 | 0.620 | 0.780 | 0.677 | 0.660 | 0.670 | 0.780 | 0.767 | 0.707 | 0.790 | 0.710 | 0.600 | 0.710 | 0.540 | 0.670 | 0.760 | 0.692 | 0.890 | 0.750 | 0.672 | 0.822 | 0.890 | 0.670 | 0.735 |
| III | GACCCA | 0.503 | 0.757 | 0.610 | 0.740 | 0.720 | 0.640 | 0.496 | 0.605 | 0.805 | 0.823 | 0.707 | 0.590 | 0.800 | 0.430 | 0.720 | 0.820 | 0.157 | 0.713 | 0.615 | 0.755 | 0.655 | 0.598 | 0.988 | 0.720 | 0.730 | 0.630 |
| III | TTTGGG | 0.544 | 0.720 | 0.820 | 0.786 | 0.670 | 0.615 | 0.654 | 0.605 | 0.700 | 0.757 | 0.677 | 0.670 | 0.704 | 0.730 | 0.800 | 0.653 | 0.367 | 0.833 | 0.843 | 0.570 | 0.650 | 0.595 | 0.896 | 0.520 | 0.510 | 0.650 |
| III | AATCCG | 0.724 | 0.620 | 0.470 | 0.408 | 0.660 | 0.630 | 0.649 | 0.513 | 0.575 | 0.590 | 0.673 | 0.718 | 0.686 | 0.500 | 0.485 | 0.750 | 0.793 | 0.802 | 0.733 | 0.610 | 0.745 | 0.480 | 0.793 | 0.890 | 0.390 | 0.885 |
| III | AAAGCC | 0.667 | 0.665 | 0.563 | 0.674 | 0.660 | 0.661 | 0.678 | 0.618 | 0.830 | 0.680 | 0.563 | 0.617 | 0.708 | 0.820 | 0.735 | 0.450 | 0.740 | 0.755 | 0.698 | 0.880 | 0.705 | 0.635 | 0.824 | 0.720 | 0.860 | 0.630 |
| III | CCGACA | 0.533 | 0.692 | 0.725 | 0.732 | 0.690 | 0.284 | 0.241 | 0.588 | 0.775 | 0.793 | 0.547 | 0.550 | 0.760 | 0.830 | 0.795 | 0.753 | 0.367 | 0.767 | 0.448 | 0.115 | 0.425 | 0.630 | 1.050 | 0.520 | 0.520 | 0.755 |
| III | GTGGAC | 0.721 | 0.910 | 0.672 | 0.842 | 0.680 | 0.663 | 0.567 | 0.713 | 0.625 | 0.987 | 0.593 | 0.268 | 0.486 | 0.520 | 0.865 | 0.800 | 0.147 | 0.775 | 0.653 | 0.450 | 0.455 | 0.772 | 1.020 | 0.950 | 0.720 | 0.850 |
| III | GTCGAG | 0.761 | 0.920 | 0.710 | 0.880 | 0.670 | 0.671 | 0.650 | 0.690 | 0.635 | 0.840 | 0.430 | 0.395 | 0.634 | 0.630 | 0.905 | 0.753 | 0.367 | 0.688 | 0.715 | 0.495 | 0.535 | 0.730 | 1.021 | 0.720 | 0.540 | 0.660 |
| III | GATGGG | 0.501 | 0.633 | 0.580 | 0.758 | 0.700 | 0.654 | 0.622 | 0.682 | 0.655 | 0.600 | 0.680 | 0.670 | 0.670 | 0.590 | 0.700 | 0.717 | 0.397 | 0.747 | 0.557 | 0.735 | 0.600 | 0.627 | 0.974 | 0.520 | 0.780 | 0.540 |
| III | ATCCGA | 0.643 | 0.662 | 0.445 | 0.746 | 0.690 | 0.626 | 0.521 | 0.493 | 0.700 | 0.773 | 0.557 | 0.722 | 0.726 | 0.320 | 0.570 | 0.750 | 0.673 | 0.785 | 0.845 | 0.465 | 0.780 | 0.630 | 0.862 | 0.890 | 0.380 | 0.685 |
| III | CCGAGA | 0.683 | 0.688 | 0.725 | 0.738 | 0.650 | 0.503 | 0.458 | 0.572 | 0.835 | 0.797 | 0.657 | 0.662 | 0.758 | 0.840 | 0.865 | 0.747 | 0.590 | 0.645 | 0.672 | 0.340 | 0.545 | 0.667 | 1.050 | 0.670 | 0.350 | 0.535 |
| III | CCGTAA | 0.556 | 0.738 | 0.603 | 0.788 | 0.220 | 0.428 | 0.604 | 0.395 | 0.690 | 0.610 | 0.230 | 0.535 | 0.728 | 0.710 | 0.595 | 0.603 | 0.797 | 0.733 | 0.440 | 0.565 | 0.585 | 0.347 | 0.838 | 0.670 | 0.280 | 0.665 |
| III | CCAATA | 0.526 | 0.557 | 0.707 | 0.464 | 0.710 | 0.723 | 0.684 | 0.670 | 0.535 | 0.370 | 0.730 | 0.670 | 0.638 | 0.800 | 0.575 | 0.653 | 0.587 | 0.705 | 0.790 | 0.560 | 0.645 | 0.745 | 0.647 | 0.670 | 0.700 | 0.640 |
| III | GAGTGG | 0.544 | 0.820 | 0.740 | 0.704 | 0.870 | 0.672 | 0.605 | 0.758 | 0.665 | 0.593 | 0.680 | 0.580 | 0.502 | 0.780 | 0.845 | 0.603 | 0.660 | 0.737 | 0.703 | 0.670 | 0.535 | 0.623 | 0.977 | 0.450 | 0.890 | 0.645 |
| III | ACGAGG | 0.643 | 0.743 | 0.758 | 0.874 | 0.690 | 0.672 | 0.632 | 0.430 | 0.850 | 0.770 | 0.743 | 0.623 | 0.806 | 0.920 | 0.690 | 0.547 | 0.873 | 0.705 | 0.445 | 0.680 | 0.540 | 0.608 | 1.013 | 0.220 | 0.680 | 0.450 |
| III | GGCTCA | 0.711 | 0.810 | 0.632 | 0.720 | 0.660 | 0.559 | 0.590 | 0.742 | 0.795 | 0.817 | 0.760 | 0.487 | 0.620 | 0.660 | 0.725 | 0.780 | 0.290 | 0.795 | 0.657 | 0.765 | 0.700 | 0.763 | 1.000 | 0.710 | 0.760 | 0.740 |
| III | GCTGAG | 0.678 | 0.800 | 0.680 | 0.868 | 0.690 | 0.513 | 0.562 | 0.620 | 0.715 | 0.803 | 0.747 | 0.490 | 0.520 | 0.710 | 0.690 | 0.773 | 0.593 | 0.785 | 0.682 | 0.665 | 0.605 | 0.675 | 1.018 | 0.720 | 0.630 | 0.645 |
| III | GGCTAA | 0.538 | 0.627 | 0.722 | 0.626 | 0.440 | 0.652 | 0.657 | 0.740 | 0.670 | 0.763 | 0.773 | 0.465 | 0.670 | 0.490 | 0.625 | 0.710 | 0.517 | 0.745 | 0.810 | 0.665 | 0.670 | 0.685 | 0.833 | 0.940 | 0.530 | 0.560 |
| III | ACCGAT | 0.511 | 0.675 | 0.495 | 0.712 | 0.430 | 0.669 | 0.397 | 0.577 | 0.665 | 0.587 | 0.550 | 0.867 | 0.734 | 0.520 | 0.565 | 0.593 | 0.740 | 0.767 | 0.855 | 0.565 | 0.850 | 0.665 | 0.814 | 0.890 | 0.580 | 0.675 |
| III | TGCCAG | 0.646 | 0.807 | 0.897 | 0.904 | 0.690 | 0.482 | 0.591 | 0.615 | 0.760 | 0.857 | 0.707 | 0.567 | 0.730 | 0.860 | 0.770 | 0.907 | 0.670 | 0.677 | 0.628 | 0.450 | 0.760 | 0.632 | 1.074 | 0.890 | 0.520 | 0.560 |
| III | GCCAGA | 0.700 | 0.838 | 0.930 | 0.814 | 0.670 | 0.609 | 0.665 | 0.710 | 0.775 | 0.743 | 0.557 | 0.610 | 0.654 | 0.840 | 0.775 | 0.833 | 0.527 | 0.607 | 0.677 | 0.565 | 0.565 | 0.775 | 1.010 | 0.500 | 0.500 | 0.535 |
| III | TGGGGT | 0.554 | 0.828 | 0.773 | 0.820 | 0.600 | 0.517 | 0.635 | 0.463 | 0.815 | 0.937 | 0.540 | 0.740 | 0.652 | 0.680 | 0.805 | 0.687 | 0.440 | 0.855 | 0.455 | 0.655 | 0.565 | 0.517 | 1.018 | 0.660 | 0.600 | 0.575 |
| III | TGTGGC | 0.637 | 0.805 | 0.863 | 0.814 | 0.680 | 0.448 | 0.498 | 0.685 | 0.845 | 0.757 | 0.560 | 0.667 | 0.656 | 0.900 | 0.780 | 0.837 | 0.300 | 0.698 | 0.557 | 0.450 | 0.345 | 0.677 | 1.011 | 0.270 | 0.710 | 0.645 |
| III | AAGTGG | 0.486 | 0.677 | 0.742 | 0.800 | 0.870 | 0.672 | 0.561 | 0.595 | 0.650 | 0.597 | 0.900 | 0.680 | 0.492 | 0.800 | 0.730 | 0.380 | 0.873 | 0.743 | 0.568 | 0.665 | 0.570 | 0.617 | 0.803 | 0.220 | 0.810 | 0.555 |
| III | TAAACG | 0.617 | 0.635 | 0.615 | 0.598 | 0.430 | 0.797 | 0.712 | 0.565 | 0.640 | 0.597 | 0.643 | 0.278 | 0.672 | 0.670 | 0.500 | 0.417 | 0.813 | 0.570 | 0.700 | 0.680 | 0.420 | 0.443 | 0.653 | 0.730 | 0.690 | 0.775 |
| III | TAATCG | 0.628 | 0.680 | 0.627 | 0.416 | 0.430 | 0.801 | 0.669 | 0.557 | 0.440 | 0.377 | 0.863 | 0.448 | 0.754 | 0.670 | 0.295 | 0.597 | 0.873 | 0.680 | 0.757 | 0.485 | 0.590 | 0.667 | 0.573 | 0.890 | 0.670 | 0.770 |
| III | ATCGAA | 0.560 | 0.667 | 0.597 | 0.850 | 0.700 | 0.79  |       |       |       |       |       |       |       |       |       |       |       |       |       |       |       |       |       |       |       |       |

|     |        |       |       |       |       |       |       |       |       |       |       |       |       |       |       |       |       |       |       |       |       |       |       |       |       |       |       |
|-----|--------|-------|-------|-------|-------|-------|-------|-------|-------|-------|-------|-------|-------|-------|-------|-------|-------|-------|-------|-------|-------|-------|-------|-------|-------|-------|-------|
| III | GGATAA | 0.618 | 0.442 | 0.522 | 0.414 | 0.440 | 0.836 | 0.725 | 0.693 | 0.665 | 0.563 | 0.820 | 0.465 | 0.694 | 0.680 | 0.475 | 0.567 | 0.663 | 0.708 | 0.762 | 0.470 | 0.700 | 0.772 | 0.643 | 1.100 | 0.330 | 0.780 |
| III | ATAAGG | 0.582 | 0.568 | 0.548 | 0.660 | 0.670 | 0.764 | 0.809 | 0.455 | 0.660 | 0.520 | 0.450 | 0.653 | 0.748 | 0.820 | 0.490 | 0.343 | 0.950 | 0.703 | 0.525 | 0.840 | 0.540 | 0.570 | 0.634 | 0.660 | 0.590 | 0.560 |
| III | CCACAG | 0.527 | 0.800 | 0.785 | 0.858 | 0.650 | 0.577 | 0.502 | 0.647 | 0.970 | 0.747 | 0.653 | 0.585 | 0.614 | 0.800 | 0.800 | 0.750 | 0.730 | 0.792 | 0.590 | 0.355 | 0.470 | 0.723 | 1.040 | 0.440 | 0.630 | 0.675 |
| III | AAATCC | 0.682 | 0.422 | 0.438 | 0.392 | 0.650 | 0.877 | 0.791 | 0.590 | 0.570 | 0.560 | 0.893 | 0.780 | 0.728 | 0.370 | 0.500 | 0.763 | 0.810 | 0.887 | 0.658 | 0.880 | 0.685 | 0.765 | 0.604 | 0.880 | 0.480 | 0.955 |
| III | ATCCAA | 0.506 | 0.610 | 0.557 | 0.782 | 0.670 | 0.741 | 0.711 | 0.565 | 0.475 | 0.783 | 0.727 | 0.603 | 0.738 | 0.210 | 0.570 | 0.793 | 0.597 | 0.745 | 0.867 | 0.560 | 0.640 | 0.588 | 0.686 | 1.110 | 0.600 | 0.575 |
| III | AGTGGA | 0.588 | 0.865 | 0.827 | 0.808 | 0.660 | 0.707 | 0.664 | 0.670 | 0.650 | 0.693 | 0.713 | 0.477 | 0.418 | 0.780 | 0.810 | 0.557 | 0.377 | 0.740 | 0.743 | 0.570 | 0.530 | 0.642 | 0.800 | 0.510 | 0.690 | 0.775 |
| III | ATGCCA | 0.713 | 0.647 | 0.765 | 0.682 | 0.670 | 0.512 | 0.618 | 0.672 | 0.670 | 0.813 | 0.697 | 0.662 | 0.782 | 0.690 | 0.635 | 0.753 | 0.667 | 0.735 | 0.427 | 0.615 | 0.780 | 0.522 | 0.860 | 0.890 | 0.660 | 0.680 |
| III | CATACG | 0.539 | 0.585 | 0.528 | 0.584 | 0.710 | 0.743 | 0.694 | 0.465 | 0.775 | 0.687 | 0.223 | 0.720 | 0.730 | 0.780 | 0.680 | 0.623 | 0.747 | 0.685 | 0.638 | 0.685 | 0.550 | 0.437 | 0.826 | 0.520 | 0.730 | 0.645 |
| III | TTATCC | 0.618 | 0.442 | 0.522 | 0.414 | 0.440 | 0.836 | 0.725 | 0.693 | 0.665 | 0.563 | 0.820 | 0.465 | 0.694 | 0.680 | 0.475 | 0.567 | 0.663 | 0.708 | 0.762 | 0.470 | 0.700 | 0.772 | 0.643 | 1.100 | 0.330 | 0.780 |
| III | GTCCAT | 0.676 | 0.762 | 0.645 | 0.688 | 0.490 | 0.699 | 0.576 | 0.655 | 0.405 | 0.747 | 0.530 | 0.443 | 0.714 | 0.580 | 0.695 | 0.737 | 0.367 | 0.703 | 0.745 | 0.570 | 0.485 | 0.672 | 0.801 | 0.880 | 0.760 | 0.855 |
| III | TATCCA | 0.532 | 0.385 | 0.482 | 0.418 | 0.650 | 0.732 | 0.736 | 0.620 | 0.490 | 0.567 | 0.717 | 0.578 | 0.768 | 0.450 | 0.535 | 0.790 | 0.597 | 0.662 | 0.838 | 0.480 | 0.505 | 0.670 | 0.677 | 1.110 | 0.490 | 0.660 |
| III | GATAAG | 0.561 | 0.400 | 0.450 | 0.538 | 0.480 | 0.866 | 0.822 | 0.530 | 0.565 | 0.477 | 0.667 | 0.613 | 0.792 | 0.640 | 0.530 | 0.407 | 0.797 | 0.670 | 0.645 | 0.855 | 0.670 | 0.520 | 0.613 | 0.720 | 0.840 | 0.650 |
| III | ATGTGG | 0.533 | 0.578 | 0.563 | 0.628 | 0.690 | 0.569 | 0.520 | 0.585 | 0.840 | 0.717 | 0.673 | 0.710 | 0.620 | 0.570 | 0.685 | 0.533 | 0.727 | 0.705 | 0.442 | 0.430 | 0.350 | 0.590 | 0.816 | 0.220 | 0.570 | 0.665 |
| III | ATCCTA | 0.561 | 0.583 | 0.437 | 0.652 | 0.700 | 0.818 | 0.731 | 0.352 | 0.690 | 0.597 | 0.560 | 0.785 | 0.686 | 0.420 | 0.350 | 0.667 | 0.663 | 0.568 | 0.840 | 0.670 | 0.830 | 0.700 | 0.689 | 0.890 | 0.610 | 0.460 |
| III | AAAATC | 0.748 | 0.270 | 0.427 | 0.344 | 0.850 | 1.035 | 0.914 | 0.750 | 0.555 | 0.507 | 0.930 | 0.753 | 0.770 | 0.430 | 0.465 | 0.537 | 0.963 | 0.740 | 0.670 | 1.040 | 0.660 | 0.735 | 0.431 | 0.890 | 0.920 | 0.795 |
| III | AATTGA | 0.630 | 0.625 | 0.782 | 0.674 | 0.650 | 1.044 | 0.777 | 0.752 | 0.210 | 0.333 | 0.767 | 0.440 | 0.614 | 0.560 | 0.495 | 0.487 | 0.817 | 0.790 | 0.688 | 0.790 | 0.670 | 0.750 | 0.401 | 0.670 | 0.740 | 0.775 |
| III | AGAGTG | 0.681 | 0.640 | 0.705 | 0.566 | 0.490 | 0.788 | 0.735 | 0.707 | 0.655 | 0.597 | 0.820 | 0.703 | 0.648 | 0.650 | 0.590 | 0.450 | 0.677 | 0.763 | 0.845 | 0.795 | 0.725 | 0.617 | 0.796 | 0.670 | 0.870 | 0.665 |
| III | ATCAGA | 0.687 | 0.565 | 0.603 | 0.700 | 0.850 | 0.836 | 0.729 | 0.640 | 0.465 | 0.597 | 0.697 | 0.665 | 0.652 | 0.400 | 0.340 | 0.693 | 0.737 | 0.743 | 0.685 | 0.675 | 0.765 | 0.750 | 0.679 | 0.890 | 0.600 | 0.695 |
| III | TCAGAA | 0.721 | 0.683 | 0.627 | 0.752 | 0.700 | 0.815 | 0.739 | 0.677 | 0.680 | 0.487 | 0.547 | 0.668 | 0.628 | 0.370 | 0.380 | 0.780 | 0.840 | 0.688 | 0.728 | 0.460 | 0.730 | 0.692 | 0.722 | 0.890 | 0.520 | 0.885 |
| III | ATTAAA | 0.681 | 0.565 | 0.807 | 0.656 | 0.450 | 0.975 | 0.997 | 0.632 | 0.230 | 0.537 | 0.833 | 0.603 | 0.760 | 0.470 | 0.545 | 0.500 | 0.940 | 0.848 | 0.718 | 0.815 | 0.680 | 0.607 | 0.288 | 1.110 | 0.790 | 0.780 |
| III | AAAATG | 0.752 | 0.335 | 0.570 | 0.512 | 0.710 | 0.980 | 0.867 | 0.642 | 0.630 | 0.513 | 0.890 | 0.695 | 0.704 | 0.650 | 0.490 | 0.407 | 1.090 | 0.688 | 0.705 | 1.000 | 0.560 | 0.623 | 0.448 | 0.660 | 0.980 | 0.885 |
| III | CTTATC | 0.561 | 0.400 | 0.450 | 0.538 | 0.480 | 0.866 | 0.822 | 0.530 | 0.565 | 0.477 | 0.667 | 0.613 | 0.792 | 0.640 | 0.530 | 0.407 | 0.797 | 0.670 | 0.645 | 0.855 | 0.670 | 0.520 | 0.613 | 0.720 | 0.840 | 0.650 |

Appendix Table 1
